# Supplementary material for: Associations of adiposity measurements with thyroid nodules in Chinese children living in iodine-sufficient areas: an observational study
Source: PubMed Central journal article supplement — BMJ Open. 2017 Oct 30;7(10):e016706. doi: 10.1136/bmjopen-2017-016706 (PMC5665290; doi:10.1136/bmjopen-2017-016706), 2017-10-30
Supplement: bmjopen-2017-016706.draft_revisions.pdf [file bmjopen-2017-016706.draft_revisions.pdf]

# BMJ Open

BMJ Open is committed to open peer review. As part of this commitment we make the peer review history of every article we publish publicly available.

When an article is published we post the peer reviewers' comments and the authors' responses online. We also post the versions of the paper that were used during peer review. These are the versions that the peer review comments apply to.

The versions of the paper that follow are the versions that were submitted during the peer review process. They are not the versions of record or the final published versions. They should not be cited or distributed as the published version of this manuscript.

BMJ Open is an open access journal and the full, final, typeset and author-corrected version of record of the manuscript is available on our site with no access controls, subscription charges or pay-per-view fees (<http://bmjopen.bmj.com>).

If you have any questions on BMJ Open's open peer review process please email [editorial.bmjopen@bmj.com](mailto:editorial.bmjopen@bmj.com)

# BMJ Open

## Associations of adiposity measurements with thyroid nodules in Chinese children living in iodine-sufficiency areas: an observational study

|                                 |                                                                                                                                                                                                                                                                                      |
|---------------------------------|--------------------------------------------------------------------------------------------------------------------------------------------------------------------------------------------------------------------------------------------------------------------------------------|
| Journal:                        | <i>BMJ Open</i>                                                                                                                                                                                                                                                                      |
| Manuscript ID                   | bmjopen-2017-016706                                                                                                                                                                                                                                                                  |
| Article Type:                   | Research                                                                                                                                                                                                                                                                             |
| Date Submitted by the Author:   | 06-Mar-2017                                                                                                                                                                                                                                                                          |
| Complete List of Authors:       | Wang, Na; Fudan University, Key Laboratory of Public Health Safety of Ministry of Education, School of Public Health, Fudan University, Shanghai 200032, China<br>Fang, Hong<br>Fu, Chaowei<br>Huang, Peixin<br>Su, Meifang<br>Jiang, Feng<br>Zhao, Qi<br>Chen, Yue<br>Jiang, Qingwu |
| <b>Primary Subject Heading</b>: | Epidemiology                                                                                                                                                                                                                                                                         |
| Secondary Subject Heading:      | Paediatrics, Nutrition and metabolism                                                                                                                                                                                                                                                |
| Keywords:                       | adiposity, thyroid nodule(s), children, iodine                                                                                                                                                                                                                                       |
|                                 |                                                                                                                                                                                                                                                                                      |

SCHOLARONE™  
Manuscripts

1  
2  
3  
4 **Associations of adiposity measurements with thyroid nodules in**  
5  
6 **Chinese children living in iodine-sufficiency areas: an observational**  
7  
8 **study**  
9

10  
11  
12 **Na Wang<sup>1</sup>, Hong Fang<sup>2</sup>, Chaowei Fu<sup>1</sup>, Peixin Huang<sup>3</sup>, Meifang Su<sup>4</sup>, Feng Jiang<sup>1</sup>,**  
13 **Qi Zhao<sup>1\*</sup>, Yue Chen<sup>5</sup>, Qingwu Jiang<sup>1</sup>**  
14

15  
16 1 Department of Epidemiology, School of Public Health, Key Laboratory of Public  
17 Health Safety of Ministry of Education, Fudan University, Shanghai, China  
18

19  
20 2 Department of Chronic Disease Control and Prevention, Shanghai Minhang Center  
21 for Disease Control and Prevention, Shanghai, China  
22

23  
24 3 Department of Chronic Disease Control and Prevention, Haimen City Center for  
25 Disease Control and Prevention, Haimen, China  
26

27  
28 4 Department of Chronic Disease Control and Prevention, Yuhuan County Center of  
29 Disease Control and Prevention, Taizhou, China  
30

31  
32 5 School of Epidemiology, Public Health and Preventive Medicine, Faculty of  
33 Medicine, University of Ottawa, Ottawa, Canada  
34

35 \* Author to whom correspondence should be address;E-mail: [zhaoqi@shmu.edu.cn](mailto:zhaoqi@shmu.edu.cn)  
36  
37 Tel: +86-21-54237355 Address: Room 421, Building 8, No.130 Dongan Road, Xuhui  
38 District, Shanghai 200032, China  
39

40 **Word Count: 2503 Figures: 1 Tables:3**  
41

42  
43 Keywords: adiposity, thyroid nodule(s), children, iodine  
44  
45  
46  
47  
48  
49  
50  
51  
52  
53  
54  
55  
56  
57  
58  
59  
60

## Abstract

**Objectives:** Obesity has been found to be associated with an elevated risk of thyroid nodule(s), mainly in adults; however, evidence for this association in children was limited. The objective of this study was to investigate the association of adiposity and thyroid nodule(s) in children living in iodine-sufficiency areas.

**Setting and participants:** We examined the associations of a number of anthropometric measurements with thyroid nodule(s) using a cross-sectional study data from 1,403 Chinese children living in the East Coast of China in 2014.

**Outcome measures:** Anthropometric measures, including height, weight, and waist and hip circumferences were collected and body mass index (BMI), body surface area (BSA), and waist-hip-ratio (WHR) were then calculated. Thyroid ultrasonography was performed to assess thyroid volume and nodules.

**Results:** Based on BMI, 255(18.17%) children were overweight and 174(12.40%) were obese. Thyroid nodule(s) was detected in 18.46% of all participants and showed little age- and sex-variations. As compared with normal weight children, obese children, but not overweight ones, experienced significantly higher risks for solitary (OR: 2.07 (95% CI: 1.16, 3.71)) and multiple (OR:1.67(95%CI:1.03, 2.70)) thyroid nodules. Similar associations were observed with waist circumference (WC) and BSA, while WHR showed no association with thyroid(s). There were no notable differences in the associations between children consuming iodized and non-iodized salt.

**Conclusions:** These findings provide further evidence that childhood obesity is associated with the risk for thyroid nodule(s).

**Strengths and limitations of this study:**

- Used large sample size, directly measured thyroid ultrasonography and anthropometric measurements following a standardized protocol.
- Permitted analysis of a large number of children with detailed information distinguishing solitary and multiple nodules and household iodized salt consumption status on the individual level.
- Lack of information on thyroid function and then unable to further evaluate potential mechanisms.

## INTRODUCTION

Thyroid nodule (TN) is a common thyroid disorder that has a global influence<sup>1 2</sup>.

Thyroid ultrasound investigations have documented very high prevalences (approaching 50%) of thyroid nodules worldwide<sup>3-5</sup>. Potential risk factors for thyroid nodules included age, sex, iodine intake<sup>3 6-8</sup>, demographic parameters, clinical history and waist circumference (WC)<sup>2 9</sup>.

Obesity is a known risk factor for a number of chronic conditions, and may also increase the risk of thyroid cancer<sup>10-14</sup>. The recent increase in thyroid nodules and thyroid cancer may partly be due to the epidemic of obesity<sup>9 15 16</sup>. Elevated thyroid stimulating hormone (TSH) levels and declined free thyroxin (FT4) levels have been observed in obese patients<sup>15</sup>. However, previous studies explored the associations between obesity and thyroid mainly in adults and the results were not entirely consistent. Whether these data from adults can be applied to children is not clear, particularly because the body weight and body surface area (BSA) of children are rather different (smaller) from those of adults<sup>15</sup>.

In the current study, we conducted a large-scale epidemiological study to determine the associations of a number of anthropometric measurements including body mass index (BMI), BSA, WC and waist-hip ratio (WHR) with solitary or multiple thyroid nodules in school age children.

## METHODS

### Study population

1  
2  
3  
4  
5  
6  
7  
8  
9  
10  
11  
12  
13  
14  
15  
16  
17  
18  
19  
20  
21  
22  
23  
24  
25  
26  
27  
28  
29  
30  
31  
32  
33  
34  
35  
36  
37  
38  
39  
40  
41  
42  
43  
44  
45  
46  
47  
48  
49  
50  
51  
52  
53  
54  
55  
56  
57  
58  
59  
60

Details of the study methodologies have been reported previously<sup>17</sup>. Briefly, three primary schools were selected from Minhang District in Shanghai, Haimen City in Jiangsu Province and Taizhou City in Zhejiang Province, respectively. Four classes in each grade from grade 3 to grade 5 in these schools were randomly selected and all students without preexisting thyroid conditions in selected classes were enrolled into this study. Among 1444 children enrolled, 1343 provided first morning urine samples and 1403 students completed routine physical examinations. An ultra-sound test for thyroid gland volume was performed on 1429 students. After excluding those with no physical examinations or thyroid test, we included 1403 students in the current analysis. Written consent from parents or guardians of all participants were received and the study was approved by the Ethical Review Board of the School of Public Health of Fudan University.

### **Anthropometric measurements**

Anthropometric measurements, including standing height (cm), weight (kg), and circumferences of the waist, hip and chest (cm) were taken by trained health professionals according to a standard protocol. The standing height was measured to the nearest 0.1cm without shoes. Weight was measured to the nearest 0.1kg using a digital weight scale. Body mass index was calculated as weight in kilograms divided by the square of height in meters and overweight/obese status were assessed using the BMI growth reference values for Chinese children<sup>18</sup>. The cutoffs for overweight and obesity in boys were 17.8 and 20.1 for age 8, 18.5 and 21.1 for age 9, 19.5 and 22.2 for age 10, and 20.1 and 23.2 for age 11. The corresponding cutoffs for girls were

1  
2  
3  
4  
5  
6  
7  
8  
9  
10  
11  
12  
13  
14  
15  
16  
17  
18  
19  
20  
21  
22  
23  
24  
25  
26  
27  
28  
29  
30  
31  
32  
33  
34  
35  
36  
37  
38  
39  
40  
41  
42  
43  
44  
45  
46  
47  
48  
49  
50  
51  
52  
53  
54  
55  
56  
57  
58  
59  
60

17.3 and 19.5, 17.9 and 20.4, 18.7 and 21.5, 19.6 and 22.7, respectively. Body surface area was calculated by using the following formula:  
$$\text{BSA} = (\text{Weight}^{0.425}) * (\text{Height}^{0.725}) * 0.007184.$$
 Waist-hip-ratio was calculated as waist circumference divided by hip circumference.

### **Test for thyroid nodules**

All participants received thyroid ultrasonography performed by experienced examiners at school using a real-time sector scanner with a 7.5-MHz/40-mm probe linear transducer. The ultrasonographic examination was carried out on the children lying on a desk with the neck extended. Standardized thyroid ultrasound technique was adopted according to the method described by Fuse et al<sup>19</sup>. Discrete lesion(s) within the thyroid gland that is palpably and/or ultrasonographically distinct from the surrounding thyroid parenchyma were defined as thyroid nodule(s)<sup>20</sup>. In case of abnormality in the sonographic examination of the thyroid, parents of the children would receive a written note describing the abnormal results of the examination.

### **Urine and salt samples collection and iodine concentration analyses**

First morning urine samples were collected for each participant. Students were also asked to bring a salt sample of more than 20g from home for iodine measurement. Urinary iodine concentrations (UICs) were determined following the method proposed by the Ministry of Health of the People's Republic of China (WS / T107. 2006, and GB/T13025.7—1999)<sup>21</sup>. Salt iodine content was also measured using a national standard method with a proper quality control<sup>22</sup> (GB/T 13025.7-1999) . 10% urine samples were assayed in duplicate.



1  
2  
3  
4 Iodine nutrition was determined according to WHO/UNICEF/ICCIDD: insufficient  
5  
6 (UIC  $\leq 100 \mu\text{g/L}$ ), sufficient (100-200  $\mu\text{g/L}$ ), and more than adequate (UIC  $> 200 \mu$   
7  
8  $\text{g/L}$ ). Iodized salt consumption status was categorized by using salt iodine  
9  
10 concentration: non-iodized salt ( $< 5 \text{ mg/kg}$ ) and iodized salt ( $\geq 5 \text{ mg/kg}$ ).  
11  
12

### 13 14 **Statistical analysis**

15  
16 All participants were categorized as having no nodule, solitary nodule, and multiple  
17  
18 nodules according to their thyroid nodule detection status, and into three groups of  
19  
20 under/normal weight, overweight and obesity status according to BMI. WC, WHR  
21  
22 and BSA were categorized into quintiles to assess their relations with thyroid nodules.  
23  
24 Chi-square analysis was performed to test the distribution of thyroid nodules in  
25  
26 relation to sex, age, BMI, iodized salt consumption status, urinary iodine level and  
27  
28 study area. Multinomial logistic regression analysis was used to examine the  
29  
30 associations of various anthropometric measurements with the frequency of thyroid  
31  
32 nodules (no, solitary nodule, and multiple nodules). Due to a considerable day-to-day  
33  
34 variation in iodine excretion, one-spot urinary iodine level was not a proper indicator  
35  
36 of iodine status for individuals<sup>23</sup>. Therefore, in current analysis, iodized salt  
37  
38 consumption instead of iodine concentration in urine, was included in the multivariate  
39  
40 models. We also assessed the correlation between urinary iodine concentration (UIC)  
41  
42 and iodized salt consumption and observed a significantly higher level of UIC in  
43  
44 children who consumed iodized salt at home, suggesting that iodized salt consumption  
45  
46 status could be a good proxy for iodine nutrition at a population level. Multivariable  
47  
48 logistic regression models were then used to adjust for age, sex, and iodized salt  
49  
50  
51  
52  
53  
54  
55  
56  
57  
58  
59  
60

1  
2  
3  
4 consumption. Potential effect modifications by sex, age and iodized salt consumption  
5  
6 on the associations of interest were also examined.  
7

8  
9 All analyses were performed by using SAS, version 9.3 software (SAS Institute, Inc.,  
10  
11 Cary, NC, USA), and all tests of statistical significance were base on two-side  
12  
13 probability.  
14

## 15 16 17 18 19 **RESULTS**

20  
21 Table 1 shows the demographic characteristics as well as iodine nutrition status for  
22  
23 the 1403 participants included in the analysis. The mean age was 9.54( $\pm$ 0.98) years,  
24  
25 the median BMI was 17.05(IQR: 15.55, 19.35) kg/m<sup>2</sup>, and the median UIC was  
26  
27  
28  
29 184.90 $\mu$ g/l.  
30  
31  
32  
33  
34  
35  
36  
37  
38  
39  
40  
41  
42  
43  
44  
45  
46  
47  
48  
49  
50  
51  
52  
53  
54  
55  
56  
57  
58  
59  
60

Table 1. General characteristics for children from Shanghai, Haimen and Taizhou, China, 2014

|              | Male |       | Female |       | X <sup>2</sup> | P     |
|--------------|------|-------|--------|-------|----------------|-------|
|              | No.  | %     | No.    | %     |                |       |
| Total        | 739  | 52.67 | 664    | 47.33 |                |       |
| Age (years)  |      |       |        |       | 0.788          | 0.852 |
| 8            | 116  | 15.70 | 111    | 16.72 |                |       |
| 9            | 246  | 33.29 | 215    | 32.38 |                |       |
| 10           | 237  | 32.07 | 204    | 30.72 |                |       |
| 11           | 140  | 18.94 | 134    | 20.18 |                |       |
| BMI          |      |       |        |       | 11.56          | 0.003 |
| Normal       | 531  | 71.85 | 443    | 66.72 |                |       |
| Overweight   | 110  | 14.88 | 145    | 21.84 |                |       |
| Obese        | 98   | 13.26 | 76     | 11.45 |                |       |
| Area         |      |       |        |       | 6.182          | 0.046 |
| Minhang      | 294  | 39.78 | 226    | 34.04 |                |       |
| Haimen       | 234  | 31.66 | 214    | 32.23 |                |       |
| Yuhuan       | 211  | 28.55 | 224    | 33.73 |                |       |
| UIC( μ g/L)* |      |       |        |       | 4.118          | 0.128 |
| <100         | 122  | 17.35 | 132    | 20.63 |                |       |
| 100-200      | 282  | 10.11 | 226    | 35.31 |                |       |
| >200         | 299  | 42.53 | 282    | 44.06 |                |       |

|               |     |     |       |       |       |
|---------------|-----|-----|-------|-------|-------|
| Iodized salt  |     |     |       | 0.015 | 0.901 |
| consumption** |     |     |       |       |       |
|               | No  | 250 | 36.39 | 235   | 36.72 |
|               | Yes | 437 | 63.61 | 405   | 63.28 |

\*60 missing

\*\* 76 missing

Thyroid nodule(s) were detected in 259 children, accounting for 18.46% of all the participants. Most nodules were accompanied by hypoechogenicity. The prevalence of multiple thyroid nodules was 12.54% (176/1403), which was twice of the proportion of solitary nodule (5.92% (83/1403)). The frequency of thyroid nodules showed no age or sex related difference (Table 2). The median UIC in children without nodules, with single nodule and multiple nodule were 187.80  $\mu$ g/L, 195.55  $\mu$ g/L, and 160.45  $\mu$ g/L, respectively. UIC was significantly lower in children with multiple nodules than those in the other two groups ( $X^2=7.44$ ,  $P=0.024$ ). The prevalence of multiple thyroid nodules was much higher in children consuming non-iodized salt than those consuming iodized salt.

Table 2. Comparison of the prevalence of thyroid nodules in different subgroups for children from Shanghai, Haimen and Taizhou, China, 2014

| Characteristics                     | Thyroid nodules |                   |                         |                          | $\chi^2$ | P-value |
|-------------------------------------|-----------------|-------------------|-------------------------|--------------------------|----------|---------|
|                                     | No.             | No nodule (N (%)) | Solitary nodule (N (%)) | Multiple nodules (N (%)) |          |         |
| All                                 | 1403            | 1144(81.54%)      | 83(5.92%)               | 176(12.54%)              |          |         |
| Sex                                 |                 |                   |                         |                          | 4.264    | 0.119   |
| Male                                | 739             | 617(83.49%)       | 37(5.01)                | 85(11.50%)               |          |         |
| Female                              | 664             | 527(79.37%)       | 46(6.93%)               | 91(13.70%)               |          |         |
| Age (years)                         |                 |                   |                         |                          | 11.61    | 0.071   |
| 8                                   | 227             | 192(84.58%)       | 12(5.29%)               | 23(10.13%)               |          |         |
| 9                                   | 461             | 359(77.87%)       | 34(7.38%)               | 68(14.75%)               |          |         |
| 10                                  | 441             | 374(84.81%)       | 24(5.44%)               | 43(9.75%)                |          |         |
| 11                                  | 274             | 219(79.93%)       | 13(4.74%)               | 42(15.33%)               |          |         |
| Iodized salt consumption*           |                 |                   |                         |                          | 12.46    | 0.002   |
| No                                  | 485             | 380(78.35%)       | 26(5.36%)               | 79(16.29%)               |          |         |
| Yes                                 | 842             | 708(84.09%)       | 52(6.18%)               | 82(9.74%)                |          |         |
| Urinary iodine( $\mu\text{g/l}$ )** |                 |                   |                         |                          | 13.20    | 0.010   |
| <100                                | 254             | 204(80.31%)       | 12(4.72%)               | 38(14.96%)               |          |         |
| 100-200                             | 508             | 400(78.74%)       | 31(6.10%)               | 77(15.16%)               |          |         |
| >200                                | 581             | 493(84.85%)       | 37(6.37%)               | 51(8.78%)                |          |         |
| Area                                |                 |                   |                         |                          | 155.80   | <0.001  |
| Shanghai                            | 520             | 344(66.15%)       | 49(9.42%)               | 127(24.42%)              |          |         |
| Haimen                              | 448             | 426(95.09%)       | 20(4.46%)               | 2(0.45%)                 |          |         |
| Taizhou                             | 435             | 374(85.95%)       | 14(3.22%)               | 47(10.80%)               |          |         |

\* 76 missing

\*\* 60 missing

1  
2  
3  
4 Based on BMI, 255(18.17%) were overweight and 174(12.40%) were obese. Girls  
5  
6 were more likely to be overweight/obese than boys and the prevalence of  
7  
8 overweight/obese decreased with age in both sexes.  
9

10  
11 Both univariate and multivariable analysis revealed an association of obesity with  
12  
13 thyroid nodules (Table 3). As compared with normal weight children, obese children  
14  
15 experienced significantly higher risks for solitary and multiple thyroid nodules. The  
16  
17 association between obesity and multiple nodules tended to be more evident in girls  
18  
19 (OR: 2.10 (95% CI: 0.89, 4.89)) than in boys (OR: 1.29 (95% CI: 0.62, 2.70)) and in  
20  
21 children aged 9 years than the other age groups. In contrast, the association between  
22  
23 obesity and solitary nodule was more evident in children aged 10. Overweight was not  
24  
25 significantly associated with thyroid nodules in general, except an association with  
26  
27 multiple nodules in children aged 8.  
28  
29  
30  
31  
32  
33  
34  
35  
36  
37  
38  
39  
40  
41  
42  
43  
44  
45  
46  
47  
48  
49  
50  
51  
52  
53  
54  
55  
56  
57  
58  
59  
60

Table 3. Multinomial logistic regression analysis of obesity and thyroid nodules for children from Shanghai, Haimen and Taizhou, China, 2014

|                          |                  | Overweight              |                         | Obesity                 |                         |
|--------------------------|------------------|-------------------------|-------------------------|-------------------------|-------------------------|
|                          |                  | Solitary nodule         | Multiple nodules        | Solitary nodule         | Multiple nodules        |
|                          |                  | OR (95%CI) <sup>a</sup> | OR (95%CI) <sup>a</sup> | OR (95%CI) <sup>a</sup> | OR (95%CI) <sup>a</sup> |
| All subjects             | Model 1          | 0.62(0.30, 1.26)        | 1.37(0.92, 2.03)        | 1.84(1.04, 3.25)        | 1.44(0.91, 2.30)        |
|                          | Model 2          | 0.58(0.28, 1.20)        | 1.35(0.90, 2.00)        | 1.82(1.02, 3.24)        | 1.47(0.92, 2.35)        |
|                          | Model 3          | 0.53(0.25, 1.13)        | 1.33(0.88, 2.03)        | 1.82(0.99, 3.36)        | 1.62(0.98, 2.70)        |
|                          | Model 4          | 0.54(0.25, 1.16)        | 1.24(0.82, 1.88)        | 2.07(1.16, 3.71)        | 1.67(1.03, 2.70)        |
| Sex                      | Male (Model 3)   | 0.17(0.02, 1.28)        | 1.18(0.61, 2.26)        | 1.53(0.63, 3.71)        | 1.29(0.62, 2.70)        |
|                          | Female (Model 3) | 0.77(0.33, 1.82)        | 1.49(0.86, 2.59)        | 2.09(0.89, 4.89)        | 2.10(1.03, 4.31)        |
| Age (years)              | 8 (Model 3)      | 0.91(0.18, 4.53)        | 3.12(1.13, 8.61)        | 0.67(0.08, 5.67)        | 1.76(0.44, 7.02)        |
|                          | 9 (Model 3)      | 0.48(0.14, 1.67)        | 1.58(0.79, 3.18)        | 1.96(0.81, 4.76)        | 2.09(1.01, 4.31)        |
|                          | 10 (Model 3)     | 0.44(0.10, 1.98)        | 0.70(0.28, 1.80)        | 3.86(1.36, 10.98)       | 1.66(0.53, 5.21)        |
|                          | 11 (Model 3)     | 0.44(0.06, 3.56)        | 1.18(0.47, 2.94)        | -                       | 0.61(0.13, 2.80)        |
| Iodized salt consumption | Yes (Model 3)    | 0.48(0.18, 1.27)        | 1.76(1.03, 3.02)        | 1.76(0.88, 3.54)        | 1.50(0.78, 2.90)        |
|                          | No (Model 3)     | 0.59(0.17, 2.08)        | 0.88(0.45, 1.75)        | 1.84(0.50, 6.79)        | 1.97(0.86, 4.48)        |

Model 1: Univariate analysis

Model 2: Adjusted for sex and age

Model 3: Adjusted for sex, age, and urinary iodine concentration

Model 4: Adjusted for sex, age, and iodized salt consumption status

1  
2  
3  
4  
5  
6  
7  
8  
9  
10  
11  
12  
13  
14  
15  
16  
17  
18  
19  
20  
21  
22  
23  
24  
25  
26  
27  
28  
29  
30  
31  
32  
33  
34  
35  
36  
37  
38  
39  
40  
41  
42  
43  
44  
45  
46  
47  
48  
49  
50  
51  
52  
53  
54  
55  
56  
57  
58  
59  
60

Figures 1 presents multivariate-adjusted ORs and 95% confidence intervals for solitary and multiple thyroid nodules associated with the quintiles of BMI, BSA, WC, and WHR, respectively. After adjustment for potential confounders, greater BSA and WC were significantly related to elevated risks of both solitary and multiple nodules (p values for trend were 0.015 and 0.013, respectively). As compared with children in the lowest quintile, ORs of solitary and multiple nodules were 2.45 (95% CI: 1.24, 4.87) and 2.76 (95% CI: 1.54, 4.97) for those in the highest quintile of BSA and 3.46 (95% CI: 1.54, 7.80) and 2.18 (95% CI: 1.27, 3.74) for those in the highest quintile of WC, respectively.

The results for BMI and WHR were less consistent. BMI was positively associated with the risk of multiple nodules, while WHR showed no association with either solitary or multiple nodules.

When stratified by sex and iodized salt consumption status, the associations of BSA and WC with multiply nodules were comparable between boys and girls. However, the association of BSA with solitary nodule seemed stronger in boys (OR=5.34 (95% CI: 1.64, 17.31)) than in girls (1.47 (95% CI: 0.60, 3.61)). Those associations above were similar between children consuming iodized salt and non-iodized salt.

## DISCUSSION

In this large cross-sectional study of children living in an iodine sufficient area in East China, we observed a high prevalence of thyroid nodules and positive associations of obesity with both solitary and multiple thyroid nodules. Among several



1  
2  
3 anthropometric measurements, BSA and WC were related to the risks for both solitary  
4  
5 and multiple thyroid nodules. These findings were generally consistent across sex  
6  
7  
8  
9 groups and independent of iodized salt consumption status.

10  
11 Thyroid nodule(s) is common in adults and its impact on thyroid cancer risk is still  
12  
13 unclear<sup>15</sup>. The prevalence of incidental thyroid nodules detected by ultrasound  
14  
15 examinations is high in adults (close to 50%) even in iodine-deficient countries<sup>3-5 24</sup>.  
16  
17  
18 However, few studies have investigated the prevalence, and the spectrum of  
19  
20 appearance of ultrasound-detected findings in children. Thyroid nodules were  
21  
22 identified in 1.65% of children aged 3 to 18 years in three Japanese prefectures, and  
23  
24 the prevalence increased with age with a female predominance<sup>25</sup>. The information  
25  
26 released by Fukushima Prefecture indicated that 2014 (1.15%) of 75216 children aged  
27  
28 0-18 showed thyroid nodules<sup>26</sup>. Avula et al. conducted a retrospective analysis in 287  
29  
30 Canadian children (mean age=6.2) and detected only 1 child with multiple thyroid  
31  
32 nodules<sup>27</sup>. In healthy Greek children living in an iodine-replete area, one or more  
33  
34 nodules were observed in 5.1% of them<sup>28</sup>. For 2410 children aged 6-17 years living in  
35  
36 Hangzhou, thyroid nodules were detected in 10.66% of them<sup>29</sup>. These results showed  
37  
38 much lower frequencies than those observed in our current study, in which thyroid  
39  
40 nodules existed in 18.46% of in 1433 Chinese children with little age- and  
41  
42 sex-variations. Influencing factors include age composition, inter-observer variation,  
43  
44 iodine intake, socio-ecological status and individual and family history, as well as  
45  
46 detection sensitivity and image quality of ultrasound machine<sup>25</sup>.  
47  
48  
49  
50  
51  
52  
53  
54  
55

56 Thyroid nodule has multiple known risk factors, which include demographic  
57  
58  
59  
60

1  
2  
3 parameters, clinical history, age, sex<sup>6-8</sup> and urinary iodine excretion<sup>3</sup>. The association  
4  
5 of thyroid nodule(s) with obesity has been explored mostly in adults with inconsistent  
6  
7 results (2)(16)<sup>30 31</sup>.

8  
9  
10 Obesity is a risk factor for several chronic conditions, as well as goiter in adults<sup>32</sup>. Its  
11  
12 impact on thyroid nodules has also been investigated by using different  
13  
14 anthropometric parameters in adults. Among various parameters, BMI was most  
15  
16 frequently used as a measure of general adiposity. It has been increasingly recognized  
17  
18 that the adverse effects of obesity relate not only to the amount but also to the  
19  
20 distribution of excess body fat. Therefore, the use of BMI alone to infer health risks in  
21  
22 Asians may underestimate excess adiposity's detrimental health effects<sup>33</sup>. WHR and  
23  
24 WC were good proxy measures of central adiposity. It has been suggested that WC is  
25  
26 a better marker for total body adiposity than it is for visceral fat<sup>34</sup>. Another study has  
27  
28 shown that both WC and BMI appear to perform equally well for estimating children  
29  
30 and adolescents total and abdominal visceral fat<sup>35</sup>. BSA is a better indicator of the  
31  
32 circulating blood volume, oxygen consumption, and basal energy expenditure than  
33  
34 BMI<sup>30</sup> and has been shown to be the best independent predictor of the thyroid volume  
35  
36 in both sexes.

37  
38  
39 Several studies have found significant associations between measures of obesity and  
40  
41 risk of thyroid nodules. For example, a study conducted in Hangzhou, China observed  
42  
43 a prevalence of TN being 34.97% (33.97 for men and 36.92% for women) and  
44  
45 concluded that great WC was risk factor for new TN in this iodine-adequate area<sup>2</sup>.

46  
47  
48 Another study of postmenopausal women also revealed that WC and BMI were  
49  
50  
51  
52  
53  
54  
55  
56  
57  
58  
59  
60

1  
2  
3 associated with thyroid nodules<sup>36</sup>. A higher BMI was associated with nodule growth  
4  
5 among older patients with multiple nodules and larger dominant nodules<sup>16</sup>, which  
6  
7 was consistent with recent reports linking thyroid nodular disease to obesity and  
8  
9 insulin resistance<sup>37</sup>. The presence of insulin resistance (IR) was associated with larger  
10  
11 thyroid gland volume and an increased prevalence of thyroid nodules<sup>38,39</sup>, which  
12  
13 might be explained by obesity-related subclinical inflammation and an associated  
14  
15 increase in levels of insulin-like growth factor-1(IGF-1)<sup>38</sup>. However, some other study  
16  
17 yielded conflicting results, which suggested that patients with normal weight or  
18  
19 overweight based on BMI tended to have an increased risk of thyroid nodules, as  
20  
21 compared with obese people<sup>31</sup>.  
22  
23  
24  
25  
26  
27

28  
29 Our findings of increased risk for thyroid nodules in obese children are generally  
30  
31 consistent with those in obese adults of other studies. The association of BSA with  
32  
33 thyroid volume in children has been well established<sup>28</sup>, while its relation to thyroid  
34  
35 nodules has seldom been explored. Kim et al.<sup>31</sup> examined 7763 healthy Korean  
36  
37 population and observed a significantly smaller BSA in those with thyroid nodules  
38  
39 compared to the others, which was opposite to our findings. Considering the great  
40  
41 difference in BSA between adults and children, it need to be cautious to generalize the  
42  
43 results to children<sup>15</sup>. Xu et.al<sup>29</sup> conducted a cross-sectional study in Hangzhou, China,  
44  
45 and reported an OR of 2.97 (95% CI: 1.85 to 4.77) for thyroid nodules for children  
46  
47 with median BSA level or above as compared with those with less than median BSA.  
48  
49 However, the number of thyroid nodules was not recorded in the study.  
50  
51  
52  
53  
54

55  
56 The strengths of our study include large sample size, directly measured thyroid  
57  
58  
59  
60

1  
2  
3 ultrasonography and anthropometric measurements following a standardized protocol,  
4  
5  
6 and the abilities to distinguish solitary and multiple nodules and to adjust for  
7  
8  
9 household iodized salt consumption status. Our study also has several limitations. We  
10  
11 did not have any information on thyroid function. Therefore, we were unable to  
12  
13 further evaluate potential mechanisms that may explain the observed associations. In  
14  
15 addition, the current analysis examined thyroid and physical measurement assessed  
16  
17 only once; changes in physical measurement and thyroid nodules overtime were not  
18  
19 taken into account.  
20  
21  
22

## 23 **CONCLUSION**

24  
25 By this cross-sectional study in a relatively lean children population, we found that  
26  
27 increasing levels of general or abdominal adiposity, measured by BMI, BSA and WC,  
28  
29 were associated with a significant increase in the risk of thyroid nodule(s), especially  
30  
31 for multiple nodules in girls and solitary nodule in boys. Our findings, along with  
32  
33 those observed from mostly adult populations, emphasize the importance of  
34  
35 preventing excess adiposity for primary prevention of thyroid nodules.  
36  
37  
38  
39  
40  
41  
42  
43  
44  
45

46 **Contributors** NW, HF, CWF, PXH, MFS, QZ, and QWJ contributed to the study  
47  
48 design; NW, HF, CWF, PXH, MFS, FJ, QZ and QWJ contributed to data acquisition  
49  
50 and collection; NW, QZ, YC contributed to data analysis and interpretation; NW, QZ  
51  
52 and YC drafted the manuscript; all authors contributed to the preparation of the final  
53  
54 document, read and approved the final manuscript.  
55  
56  
57  
58  
59  
60

1  
2  
3  
4 **Funding** This work was supported by the Chinese National Natural Science  
5  
6 Foundation (No. 81602806), Shanghai Municipal Commission of Health and Family  
7  
8 Planning (No. 20144Y0104), and Shanghai Key Discipline Construction Project of  
9  
10 Shanghai Municipal Public Health (No. 15GWZK0801).  
11  
12

13  
14 **Competing interests** None declared.  
15

16 **Ethics approval** The study was approved by the Ethical Review Board of the  
17  
18 School of Public Health of Fudan University (#2012-03-0350S).  
19  
20

21 **Provenance and peer review** Not commissioned; externally peer reviewed.  
22  
23

24 **Data sharing statement** No additional data are available.  
25

26 **Open Access** This is an Open Access article distributed in accordance with the  
27  
28 Creative Commons Attribution Non Commercial (CC BY-NC 4.0) license, which  
29  
30 permits others to distribute, remix, adapt, build upon this work noncommercially, and  
31  
32 license their derivative works on different terms, provided the original work is  
33  
34 properly cited and the use is non-commercial. See: [http://](http://creativecommons.org/licenses/by-nc/4.0/)  
35  
36 [creativecommons.org/licenses/by-nc/4.0/](http://creativecommons.org/licenses/by-nc/4.0/)  
37  
38  
39  
40  
41  
42  
43  
44  
45  
46  
47  
48  
49  
50  
51  
52  
53  
54  
55  
56  
57  
58  
59  
60

## REFERENCES

1. Aydin Y, Besir FH, Erkan ME, et al. Spectrum and prevalence of nodular thyroid diseases detected by ultrasonography in the Western Black Sea region of Turkey. *Medical Ultrasonography* 2014;16(2):100-06.
2. Yin J, Wang C, Shao Q, et al. Relationship between the Prevalence of Thyroid Nodules and Metabolic Syndrome in the Iodine-Adequate Area of Hangzhou, China: A Cross-Sectional and Cohort Study. *Int J Endocrinol* 2014;2014:675796. doi: 10.1155/2014/675796
3. Carle A, Krejbjerg A, Laurberg P. Epidemiology of nodular goitre. Influence of iodine intake. *Best Pract Res Clin Endoc Metab* 2014;28(4):465-79.
4. Ajmal S, Rapoport S, Battle HR, et al. The Natural History of the Benign Thyroid Nodule: What Is the Appropriate Follow-Up Strategy? *Journal of the American College of Surgeons* 2015;220(6):987-92.
5. Guo HW, Sun M, He W, et al. The prevalence of thyroid nodules and its relationship with metabolic parameters in a Chinese community-based population aged over 40 years. *Endocrine* 2014;45(2):230-35.
6. Luo J, McManus C, Chen H, et al. Are There Predictors of Malignancy in Patients with Multinodular Goiter? *J Surg Res* 2012;174(2):207-10.
7. Akushevich I, Kravchenko J, Ukraintseva S, et al. Time trends of incidence of age-associated diseases in the US elderly population: medicare-based analysis. *Age Ageing* 2013;42(4):494-500.
8. Huan Q, Wang K, Lou FC, et al. Epidemiological characteristics of thyroid nodules and risk factors for malignant nodules: a retrospective study from 6 304 surgical cases. *Chin Med J* 2014;127(12):2286-92.
9. Shin J, Kim MH, Yoon KH, et al. Relationship between metabolic syndrome and thyroid nodules in healthy Koreans. *Korean J Intern Med* 2016;31(1):98-105.
10. Guignard R, Truong T, Rougier Y, et al. Alcohol drinking, tobacco smoking, and anthropometric characteristics as risk factors for thyroid cancer: A countrywide

- 1  
2  
3 case-control study in New Caledonia. *Am J Epidemiol* 2007;166(10):1140-49.  
4  
5 11. Leitzmann MF, Brenner A, Moore SC, et al. Prospective study of body mass index,  
6 physical activity and thyroid cancer. *Int J Cancer* 2010;126(12):2947-56.  
7  
8 12. Samanic C, Chow WH, Gridley G, et al. Relation of body mass index to cancer  
9 risk in 362,552 Swedish men. *Cancer Causes Control* 2006;17(7):901-9.  
10  
11 13. Rapp K, Schroeder J, Klenk J, et al. Obesity and incidence of cancer: a large  
12 cohort study of over 145,000 adults in Austria. *Br J Cancer* 2005;93(9):1062-7.  
13  
14 14. Han JM, Kim TY, Jeon MJ, et al. Obesity is a risk factor for thyroid cancer in a  
15 large, ultrasonographically screened population. *Eur J Endocrinol*  
16 2013;168(6):879-86.  
17  
18 15. Niedziela M. Thyroid nodules. *Best Pract Res Clin Endoc Metab*  
19 2014;28(2):245-77.  
20  
21 16. Durante C, Costante G, Lucisano G, et al. The Natural History of Benign Thyroid  
22 Nodules. *JAMA-J Am Med Assoc* 2015;313(9):926-35.  
23  
24 17. Wang N, Zhou Y, Fu C, et al. Influence of Bisphenol A on Thyroid Volume and  
25 Structure Independent of Iodine in School Children. *PLoS One*  
26 2015;10(10):e0141248.  
27  
28 18. Li H, Zong XN, Ji CY, et al. [Body mass index cut-offs for overweight and obesity  
29 in Chinese children and adolescents aged 2 - 18 years]. *Chin J Epidemiol*  
30 2010;31(6):616-20.  
31  
32 19. Fuse Y, Saito N, Tsuchiya T, et al. Smaller thyroid gland volume with high urinary  
33 iodine excretion in Japanese schoolchildren: normative reference values in an  
34 iodine-sufficient area and comparison with the WHO/ICCIDD reference. *Thyroid*  
35 2007;17(2):145-55.  
36  
37 20. Cooper DS, Doherty GM, Haugen BR, et al. Revised American Thyroid  
38 Association management guidelines for patients with thyroid nodules and  
39 differentiated thyroid cancer. *Thyroid* 2009;19(11):1167-214.  
40  
41 21. Sang Z, Wang PP, Yao Z, et al. Exploration of the safe upper level of iodine intake  
42 in euthyroid Chinese adults: a randomized double-blind trial. *Am J Clin Nutr*  
43 2012;95(2):367-73.  
44  
45  
46  
47  
48  
49  
50  
51  
52  
53  
54  
55  
56  
57  
58  
59  
60

- 1  
2  
3  
4  
5  
6  
7  
8  
9  
10  
11  
12  
13  
14  
15  
16  
17  
18  
19  
20  
21  
22  
23  
24  
25  
26  
27  
28  
29  
30  
31  
32  
33  
34  
35  
36  
37  
38  
39  
40  
41  
42  
43  
44  
45  
46  
47  
48  
49  
50  
51  
52  
53  
54  
55  
56  
57  
58  
59  
60
22. Tong YK HC, Li BQ, Li MH, Zhang NJ, Min SH, Fu SY General test method in salt industry: determination of iodide ion (GB/T 13025.7-1999). Beijing,China: China Criteria Publishing House, 1999:1-5.
  23. Jooste PL, Strydom E. Methods for determination of iodine in urine and salt. *Best Pract Res Clin Endocrinol Metab* 2010;24(1):77-88.
  24. Vander JB, Gaston EA, Dawber TR. SIGNIFICANCE OF NONTOXIC THYROID NODULES - FINAL REPORT OF A 15-YEAR STUDY OF INCIDENCE OF THYROID MALIGNANCY. *Ann Intern Med* 1968;69(3):537-&.
  25. Hayashida N, Imaizumi M, Shimura H, et al. Thyroid Ultrasound Findings in Children from Three Japanese Prefectures: Aomori, Yamanashi and Nagasaki. *PLoS One* 2013;8(12) doi: e8322010.1371/journal.pone.0083220
  26. Yasumura S, Hosoya M, Yamashita S, et al. Study protocol for the Fukushima Health Management Survey. *J Epidemiol* 2012;22(5):375-83.
  27. Avula S, Daneman A, Navarro OM, et al. Incidental thyroid abnormalities identified on neck US for non-thyroid disorders. *Pediatr Radiol* 2010;40(11):1774-80.
  28. Kaloumenou I, Alevizaki M, Ladopoulos C, et al. Thyroid volume and echostructure in schoolchildren living in an iodine-replete area: relation to age, pubertal stage, and body mass index. *Thyroid* 2007;17(9):875-81.
  29. Xu W, Chen Z, Li N, et al. Relationship of anthropometric measurements to thyroid nodules in a Chinese population. *BMJ Open* 2015;5(12):e008452.
  30. Clero E, Leux C, Brindel P, et al. Pooled analysis of two case-control studies in New Caledonia and French Polynesia of body mass index and differentiated thyroid cancer: the importance of body surface area. *Thyroid* 2010;20(11):1285-93.
  31. Kim JY, Jung EJ, Park ST, et al. Body size and thyroid nodules in healthy Korean population. *J Korean Surg Soc* 2012;82(1):13-7.
  32. Kocak M, Erem C, Deger O, et al. Current prevalence of goiter determined by ultrasonography and associated risk factors in a formerly iodine-deficient area of



- 1  
2  
3 Turkey. *Endocrine* 2014;47(1):290-98.  
4  
5 33. Consultation WE. Appropriate body-mass index for Asian populations and its  
6 implications for policy and intervention strategies. *Lancet*  
7 2004;363(9403):157-63.  
8  
9  
10 34. Sardinha LB, Santos DA, Silva AM, et al. A Comparison between BMI, Waist  
11 Circumference, and Waist-To-Height Ratio for Identifying Cardio-Metabolic Risk  
12 in Children and Adolescents. *PLoS One* 2016;11(2):e0149351.  
13  
14  
15 35. Katzmarzyk PT, Bouchard C. Where is the beef? Waist circumference is more  
16 highly correlated with BMI and total body fat than with abdominal visceral fat in  
17 children. *Int J Obes (Lond)* 2014;38(6):753-4.  
18  
19  
20 36. Zheng L, Yan WH, Kong Y, et al. An Epidemiological Study of Risk Factors of  
21 Thyroid Nodule and Goiter in Chinese Women. *Int J Environ Res Public Health*  
22 2015;12(9):11608-20.  
23  
24  
25 37. Anil C, Akkurt A, Ayturk S, et al. Impaired glucose metabolism is a risk factor for  
26 increased thyroid volume and nodule prevalence in a mild-to-moderate iodine  
27 deficient area. *Metabolism* 2013;62(7):970-5.  
28  
29  
30 38. Balkan F, Onal ED, Usluogullari A, et al. "Is there any association between insulin  
31 resistance and thyroid cancer? : a case control study". *Endocrine*  
32 2014;45(1):55-60.  
33  
34  
35 39. Ayturk S, GURSOY A, Kut A, et al. Metabolic syndrome and its components are  
36 associated with increased thyroid volume and nodule prevalence in a  
37 mild-to-moderate iodine-deficient area. *Eur J Endocrinol* 2009;161(4):599-605.  
38  
39  
40  
41  
42  
43  
44  
45  
46  
47  
48  
49  
50  
51  
52  
53  
54  
55  
56  
57  
58  
59  
60

1  
2  
3  
4  
5 Figure1. Associations of Different Physical Measurements (BMI, BSA, WC, and  
6  
7 WHR) with Thyroid Nodules for children from Shanghai, Haimen and Taizhou, China,  
8  
9 2014  
10  
11  
12  
13  
14  
15  
16  
17  
18  
19  
20  
21  
22  
23  
24  
25  
26  
27  
28  
29  
30  
31  
32  
33  
34  
35  
36  
37  
38  
39  
40  
41  
42  
43  
44  
45  
46  
47  
48  
49  
50  
51  
52  
53  
54  
55  
56  
57  
58  
59  
60

For peer review only

1  
2  
3  
4  
5  
6  
7  
8  
9  
10  
11  
12  
13  
14  
15  
16  
17  
18  
19  
20  
21  
22  
23  
24  
25  
26  
27  
28  
29  
30  
31  
32  
33  
34  
35  
36  
37  
38  
39  
40  
41  
42  
43  
44  
45  
46  
47  
48  
49  
50  
51  
52  
53  
54  
55  
56  
57  
58  
59  
60

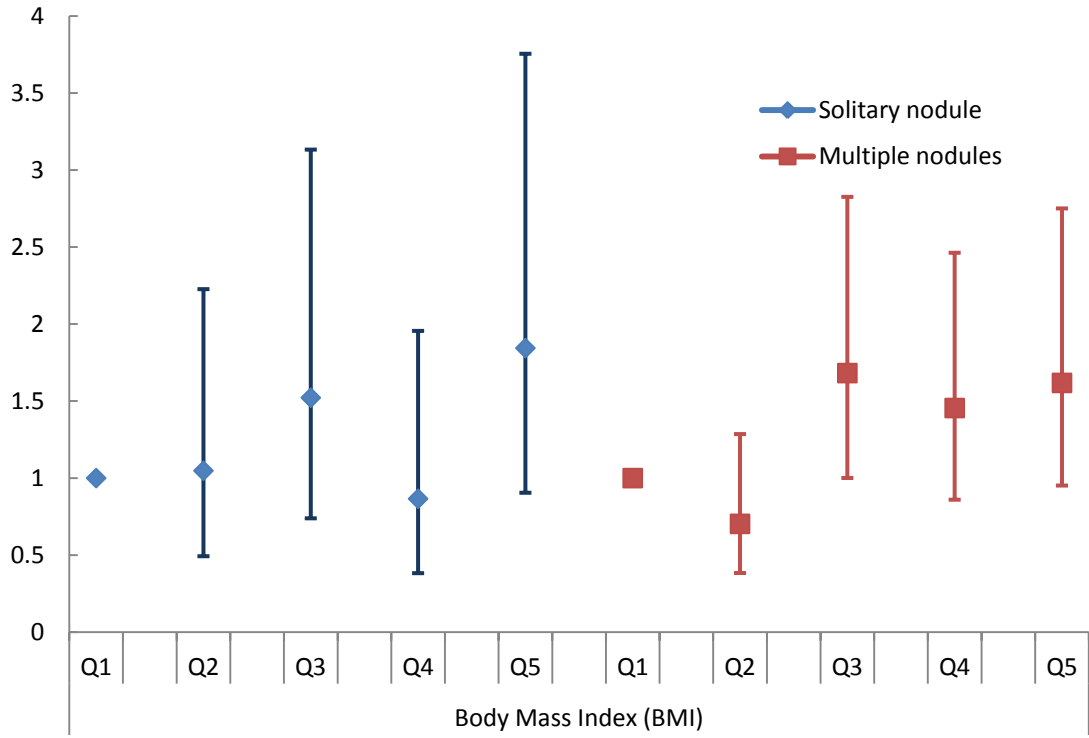

Peer review only

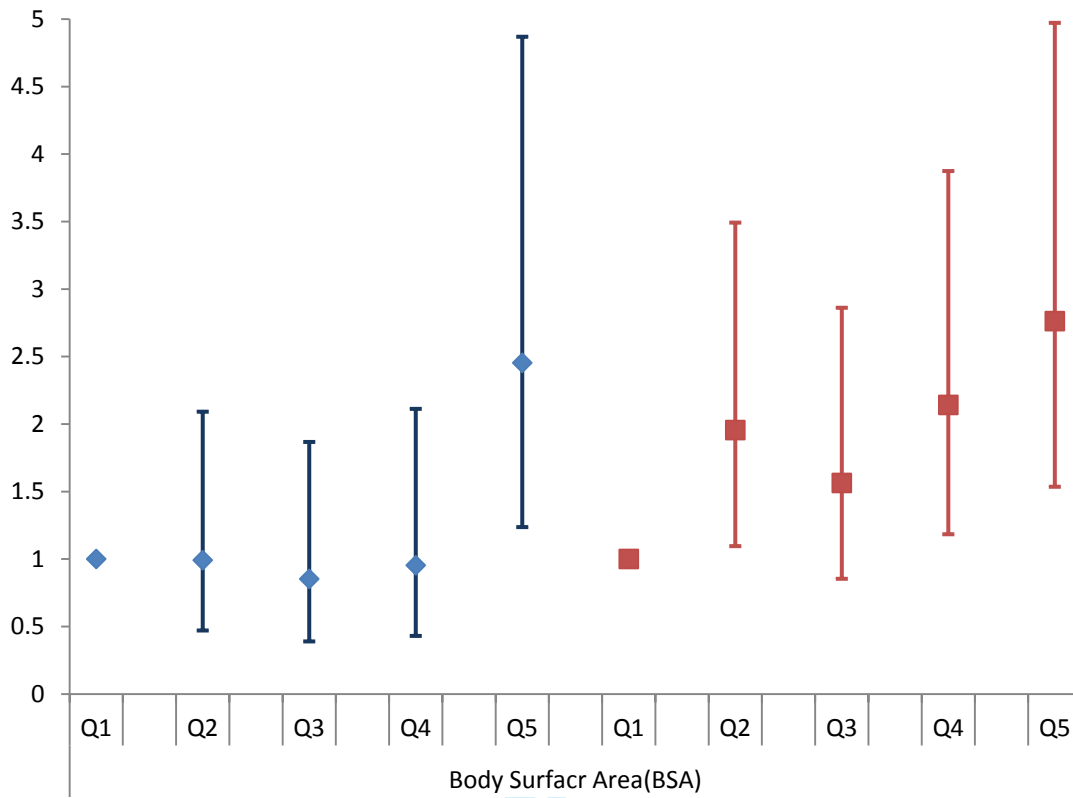

Body Surface Area(BSA)

Review only

1  
2  
3  
4  
5  
6  
7  
8  
9  
10  
11  
12  
13  
14  
15  
16  
17  
18  
19  
20  
21  
22  
23  
24  
25  
26  
27  
28  
29  
30  
31  
32  
33  
34  
35  
36  
37  
38  
39  
40  
41  
42  
43  
44  
45  
46  
47  
48  
49  
50  
51  
52  
53  
54  
55  
56  
57  
58  
59  
60

1  
2  
3  
4  
5  
6  
7  
8  
9  
10  
11  
12  
13  
14  
15  
16  
17  
18  
19  
20  
21  
22  
23  
24  
25  
26  
27  
28  
29  
30  
31  
32  
33  
34  
35  
36  
37  
38  
39  
40  
41  
42  
43  
44  
45  
46  
47  
48  
49  
50  
51  
52  
53  
54  
55  
56  
57  
58  
59  
60

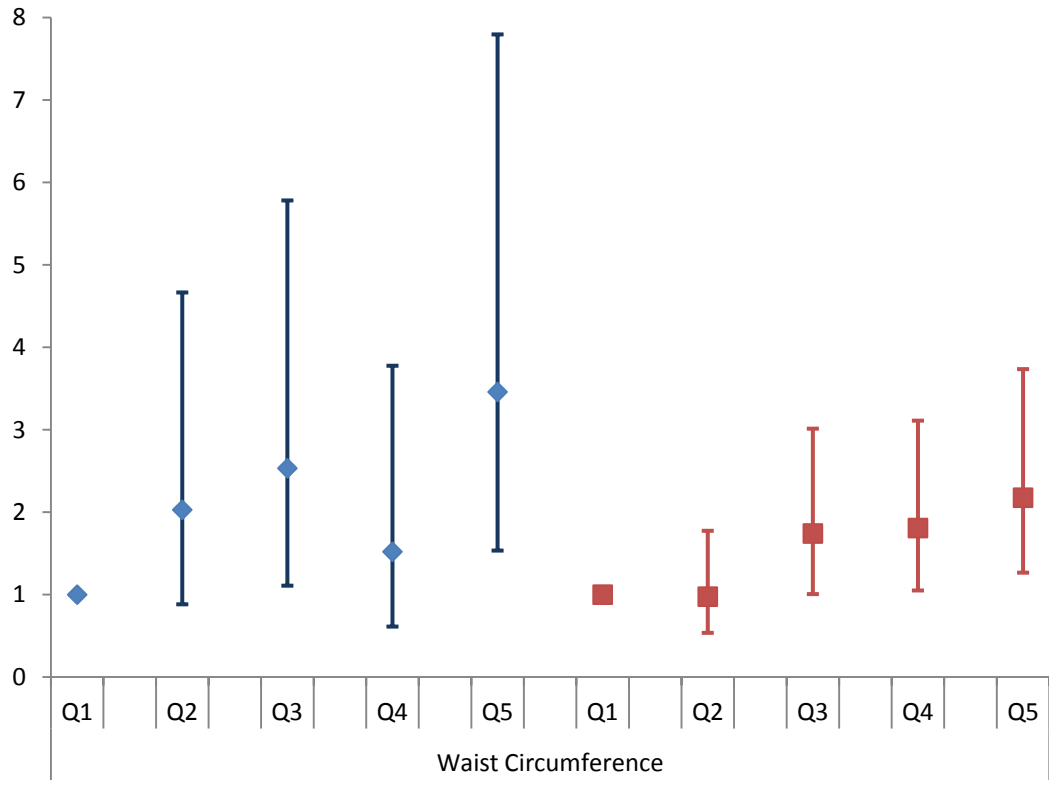

Review only

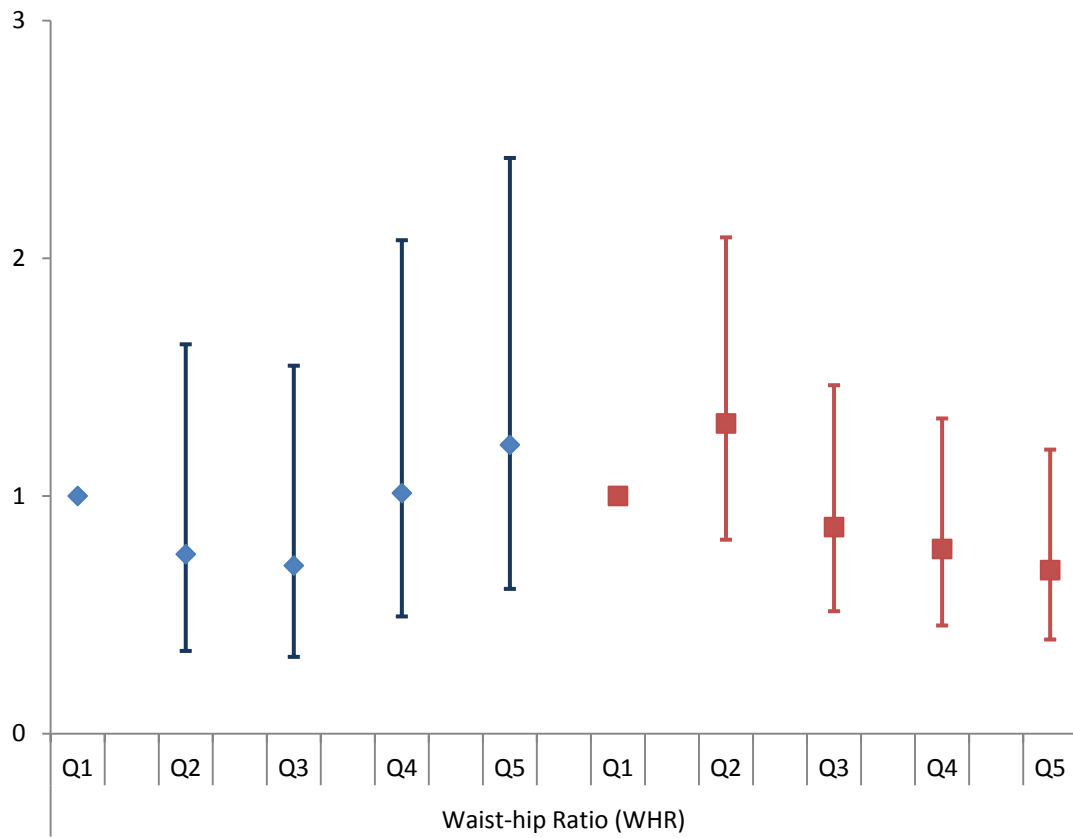

Review only

1  
2  
3  
4  
5  
6  
7  
8  
9  
10  
11  
12  
13  
14  
15  
16  
17  
18  
19  
20  
21  
22  
23  
24  
25  
26  
27  
28  
29  
30  
31  
32  
33  
34  
35  
36  
37  
38  
39  
40  
41  
42  
43  
44  
45  
46  
47  
48  
49  
50  
51  
52  
53  
54  
55  
56  
57  
58  
59  
60

STROBE 2007 (v4) Statement—Checklist of items that should be included in reports of *cross-sectional studies*

| Section/Topic             | Item # | Recommendation                                                                                                                                                                       | Reported on page # |
|---------------------------|--------|--------------------------------------------------------------------------------------------------------------------------------------------------------------------------------------|--------------------|
| Title and abstract        | 1      | (a) Indicate the study’s design with a commonly used term in the title or the abstract                                                                                               | 1                  |
|                           |        | (b) Provide in the abstract an informative and balanced summary of what was done and what was found                                                                                  | 2                  |
| <b>Introduction</b>       |        |                                                                                                                                                                                      |                    |
| Background/rationale      | 2      | Explain the scientific background and rationale for the investigation being reported                                                                                                 | 4                  |
| Objectives                | 3      | State specific objectives, including any prespecified hypotheses                                                                                                                     | 4                  |
| <b>Methods</b>            |        |                                                                                                                                                                                      |                    |
| Study design              | 4      | Present key elements of study design early in the paper                                                                                                                              | 5                  |
| Setting                   | 5      | Describe the setting, locations, and relevant dates, including periods of recruitment, exposure, follow-up, and data collection                                                      | 5,6                |
| Participants              | 6      | (a) Give the eligibility criteria, and the sources and methods of selection of participants                                                                                          | 5                  |
| Variables                 | 7      | Clearly define all outcomes, exposures, predictors, potential confounders, and effect modifiers. Give diagnostic criteria, if applicable                                             | 5,6                |
| Data sources/ measurement | 8*     | For each variable of interest, give sources of data and details of methods of assessment (measurement). Describe comparability of assessment methods if there is more than one group | 6                  |
| Bias                      | 9      | Describe any efforts to address potential sources of bias                                                                                                                            | 6                  |
| Study size                | 10     | Explain how the study size was arrived at                                                                                                                                            | 5                  |
| Quantitative variables    | 11     | Explain how quantitative variables were handled in the analyses. If applicable, describe which groupings were chosen and why                                                         | 7                  |
| Statistical methods       | 12     | (a) Describe all statistical methods, including those used to control for confounding                                                                                                | 7                  |
|                           |        | (b) Describe any methods used to examine subgroups and interactions                                                                                                                  | 7                  |
|                           |        | (c) Explain how missing data were addressed                                                                                                                                          | 7                  |
|                           |        | (d) If applicable, describe analytical methods taking account of sampling strategy                                                                                                   |                    |
|                           |        | (e) Describe any sensitivity analyses                                                                                                                                                | 7                  |
| <b>Results</b>            |        |                                                                                                                                                                                      | 8                  |

|                          |     |                                                                                                                                                                                                              |    |
|--------------------------|-----|--------------------------------------------------------------------------------------------------------------------------------------------------------------------------------------------------------------|----|
| Participants             | 13* | (a) Report numbers of individuals at each stage of study—eg numbers potentially eligible, examined for eligibility, confirmed eligible, included in the study, completing follow-up, and analysed            | 5  |
|                          |     | (b) Give reasons for non-participation at each stage                                                                                                                                                         | 5  |
|                          |     | (c) Consider use of a flow diagram                                                                                                                                                                           |    |
| Descriptive data         | 14* | (a) Give characteristics of study participants (eg demographic, clinical, social) and information on exposures and potential confounders                                                                     | 10 |
|                          |     | (b) Indicate number of participants with missing data for each variable of interest                                                                                                                          | 10 |
| Outcome data             | 15* | Report numbers of outcome events or summary measures                                                                                                                                                         | 10 |
| Main results             | 16  | (a) Give unadjusted estimates and, if applicable, confounder-adjusted estimates and their precision (eg, 95% confidence interval). Make clear which confounders were adjusted for and why they were included | 12 |
|                          |     | (b) Report category boundaries when continuous variables were categorized                                                                                                                                    | 6  |
|                          |     | (c) If relevant, consider translating estimates of relative risk into absolute risk for a meaningful time period                                                                                             |    |
| Other analyses           | 17  | Report other analyses done—eg analyses of subgroups and interactions, and sensitivity analyses                                                                                                               | 14 |
| <b>Discussion</b>        |     |                                                                                                                                                                                                              |    |
| Key results              | 18  | Summarise key results with reference to study objectives                                                                                                                                                     | 14 |
| Limitations              | 19  | Discuss limitations of the study, taking into account sources of potential bias or imprecision. Discuss both direction and magnitude of any potential bias                                                   | 18 |
| Interpretation           | 20  | Give a cautious overall interpretation of results considering objectives, limitations, multiplicity of analyses, results from similar studies, and other relevant evidence                                   | 17 |
| Generalisability         | 21  | Discuss the generalisability (external validity) of the study results                                                                                                                                        | 18 |
| <b>Other information</b> |     |                                                                                                                                                                                                              |    |
| Funding                  | 22  | Give the source of funding and the role of the funders for the present study and, if applicable, for the original study on which the present article is based                                                | 19 |

\*Give information separately for cases and controls in case-control studies and, if applicable, for exposed and unexposed groups in cohort and cross-sectional studies.

**Note:** An Explanation and Elaboration article discusses each checklist item and gives methodological background and published examples of transparent reporting. The STROBE checklist is best used in conjunction with this article (freely available on the Web sites of PLoS Medicine at <http://www.plosmedicine.org/>, Annals of Internal Medicine at <http://www.annals.org/>, and Epidemiology at <http://www.epidem.com/>). Information on the STROBE Initiative is available at [www.strobe-statement.org](http://www.strobe-statement.org).



# BMJ Open

## Associations of adiposity measurements with thyroid nodules in Chinese children living in iodine-sufficiency areas: an observational study

|                                 |                                                                                                                                                                                                                                                                                      |
|---------------------------------|--------------------------------------------------------------------------------------------------------------------------------------------------------------------------------------------------------------------------------------------------------------------------------------|
| Journal:                        | <i>BMJ Open</i>                                                                                                                                                                                                                                                                      |
| Manuscript ID                   | bmjopen-2017-016706.R1                                                                                                                                                                                                                                                               |
| Article Type:                   | Research                                                                                                                                                                                                                                                                             |
| Date Submitted by the Author:   | 30-May-2017                                                                                                                                                                                                                                                                          |
| Complete List of Authors:       | Wang, Na; Fudan University, Key Laboratory of Public Health Safety of Ministry of Education, School of Public Health, Fudan University, Shanghai 200032, China<br>Fang, Hong<br>Fu, Chaowei<br>Huang, Peixin<br>Su, Meifang<br>Jiang, Feng<br>Zhao, Qi<br>Chen, Yue<br>Jiang, Qingwu |
| <b>Primary Subject Heading</b>: | Epidemiology                                                                                                                                                                                                                                                                         |
| Secondary Subject Heading:      | Paediatrics, Nutrition and metabolism                                                                                                                                                                                                                                                |
| Keywords:                       | adiposity, thyroid nodule(s), children, iodine                                                                                                                                                                                                                                       |
|                                 |                                                                                                                                                                                                                                                                                      |

SCHOLARONE™  
Manuscripts

1  
2  
3  
4 **Associations of adiposity measurements with thyroid nodules in**  
5  
6 **Chinese children living in iodine-sufficiency areas: an observational**  
7  
8 **study**  
9

10  
11  
12 **Na Wang<sup>1</sup>, Hong Fang<sup>2</sup>, Chaowei Fu<sup>1</sup>, Peixin Huang<sup>3</sup>, Meifang Su<sup>4</sup>, Feng Jiang<sup>1</sup>,**  
13 **Qi Zhao<sup>1\*</sup>, Yue Chen<sup>5</sup>, Qingwu Jiang<sup>1</sup>**  
14

15  
16 1 Department of Epidemiology, School of Public Health, Key Laboratory of Public  
17 Health Safety of Ministry of Education, Fudan University, Shanghai, China  
18

19  
20 2 Department of Chronic Disease Control and Prevention, Shanghai Minhang Center  
21 for Disease Control and Prevention, Shanghai, China  
22

23  
24 3 Department of Chronic Disease Control and Prevention, Haimen City Center for  
25 Disease Control and Prevention, Haimen, China  
26

27  
28 4 Department of Chronic Disease Control and Prevention, Yuhuan County Center of  
29 Disease Control and Prevention, Taizhou, China  
30

31  
32 5 School of Epidemiology, Public Health and Preventive Medicine, Faculty of  
33 Medicine, University of Ottawa, Ottawa, Canada  
34

35 \* Author to whom correspondence should be address; E-mail: [zhaoqi@shmu.edu.cn](mailto:zhaoqi@shmu.edu.cn)  
36  
37 Tel: +86-21-54237355 Address: Room 421, Building 8, No.130 Dongan Road, Xuhui  
38 District, Shanghai 200032, China  
39

40 **Word Count: 2853 Figures: 2 Tables:3**  
41

42  
43 Keywords: adiposity, thyroid nodule(s), children, iodine  
44  
45  
46  
47  
48  
49  
50  
51  
52  
53  
54  
55  
56  
57  
58  
59  
60

## Abstract

**Objectives:** Obesity has been found to be associated with an elevated risk of thyroid nodule(s), mainly in adults; however, evidence for this association in children was limited. The objective of this study was to investigate the association of adiposity and thyroid nodule(s) in children living in iodine-sufficiency areas.

**Setting and participants:** We conducted a cross-sectional study of 1,403 Chinese children living in the East Coast of China in 2014.

**Outcome measures:** Anthropometric measures, including height, weight, and waist and hip circumferences were taken and body mass index (BMI), body surface area (BSA), and waist-hip-ratio (WHR) were then calculated. Thyroid ultrasonography was performed to assess thyroid volume and nodules.

**Results:** Based on BMI, 255 (18.17%) children were overweight and 174 (12.40%) were obese. Thyroid nodule(s) was detected in 18.46% of all participants and showed little age- and sex-variations. As compared with normal weight children, obese children experienced significantly higher risks for solitary (OR: 2.07 (95% CI: 1.16, 3.71)) and multiple (OR: 1.67 (95%CI: 1.03, 2.70)) thyroid nodules. Similar associations with thyroid nodule(s) were observed with adiposity measured by waist circumference (WC) and BSA, but not WHR. There were no notable differences in the associations between children consuming iodized and non-iodized salt.

**Conclusions:** These findings provide further evidence that childhood obesity is associated with the risk for thyroid nodule(s).

**Strengths and limitations of this study:**

- Large sample size, directly measured thyroid ultrasonography and various anthropometric measurements following a standardized protocol.
- Detailed information distinguishing solitary and multiple nodules and household iodized salt consumption status at the individual level.
- Lack of information on thyroid function.

## INTRODUCTION

Thyroid nodule (TN) is a common thyroid disorder globally and the incidence has been increasing in recent decades<sup>1-2</sup>. Thyroid ultrasound investigations have documented very high prevalences (approaching 50%) of thyroid nodules worldwide<sup>3-5</sup>. Potential risk factors for thyroid nodules include age, sex, iodine intake<sup>3 6-8</sup>, demographic parameters, clinical history and waist circumference (WC)<sup>2 9</sup>. Both mildly deficient iodine intake and excessive iodine intake are risk factors for thyroid nodule(s) in normal subjects<sup>10</sup>.

Obesity is a known risk factor for a number of chronic conditions, and may also increase the risk of thyroid cancer<sup>11-15</sup>. The recent increase in thyroid nodules and thyroid cancer may partly be due to the epidemic of obesity<sup>9 16-17</sup>. Elevated thyroid stimulating hormone (TSH) levels and declined free thyroxin (FT4) levels have been observed in obese patients<sup>16</sup>. However, previous studies of the associations between obesity and thyroid were mainly conducted in adults and the results were not entirely consistent. Whether these observations from adults can be applied to children is not clear, particularly because the incidence of thyroid nodules is lower but the risk for malignancy is greater in children as compared to adults<sup>18</sup>.

In the current study, we conducted a large-scale epidemiological study to determine the associations of a number of anthropometric measurements including body mass index (BMI), body surface area (BSA), WC and waist-hip ratio (WHR) with solitary or multiple thyroid nodules in school age children.

## METHODS

### Study population

Randomized cluster sampling was used to selected subjects. Similar study methodologies have been reported for an earlier study<sup>19</sup>. Briefly, three coastal cities in east China (Minhang District in Shanghai, Haimen City in Jiangsu Province and Taizhou City in Zhejiang Province) were selected by purposive sampling. Previous studies have revealed an iodine sufficient status<sup>20-22</sup> along with distinguished iodized salt consumption proportions among three sites. One primary school (students were mainly local residents) was selected from each city to ensure a good representativeness. Four classes in each grade from grade 3 to grade 5 in these schools were randomly selected in 2014 and all students in 12 selected classes in each school were enrolled into this study (Figure 1). Among 1444 eligible children, 1343 provided first morning urine samples and 1403 students completed routine physical examinations. An ultra-sound test for thyroid gland volume was performed on 1429 students. After excluding those with no physical examinations or thyroid test, we included 1403 students in the current analysis. Written consent from parents or guardians of all participants were received and the study was approved by the Ethical Review Board of the School of Public Health of Fudan University.

## Study variables

The outcome variables in this study were having thyroid nodule(s) (no, yes) and number of thyroid nodules (no nodule, solitary nodule, multiple nodules). Adiposity measurements were explanatory variables, including body mass index, body surface area, waist circumferences and waist-hip-ratio. Sex, age, urinary iodine concentrations, and iodized salt consumption status were covariates in the multivariate regression models.

## Anthropometric measurements

Anthropometric measurements, including standing height (cm), weight (kg), and circumferences of the waist, hip and chest (cm) were taken by trained health professionals according to a standard protocol. The standing height was measured to the nearest 0.1cm without shoes. Weight was measured to the nearest 0.1kg using a digital weight scale. BMI was calculated as weight in kilograms divided by the square of height in meters and all participants were categorized into three groups of under/normal weight, overweight and obesity status according to the BMI growth reference values for Chinese children<sup>23</sup>. The cutoffs for overweight and obesity in boys were 17.8 and 20.1 for age 8, 18.5 and 21.1 for age 9, 19.5 and 22.2 for age 10, and 20.1 and 23.2 for age 11. The corresponding cutoffs for girls were 17.3 and 19.5, 17.9 and 20.4, 18.7 and 21.5, 19.6 and 22.7, respectively. Body surface area was calculated by using the following formula:  $BSA = (Weight^{0.425}) * (Height^{0.725}) * 0.007184$ <sup>24</sup>. Waist-hip-ratio was calculated as waist circumference divided by hip circumference. BSA, WC, and WHR were categorized into quintiles to assess their

1  
2  
3  
4 relations with thyroid nodules.

### 5 6 **Thyroid ultrasonography**

7  
8 All participants received thyroid ultrasonography performed by experienced  
9  
10 examiners at school using a real-time sector scanner with a 7.5-MHz/40-mm probe  
11  
12 linear transducer. The ultrasonographic examination was carried out on the children  
13  
14 lying on a desk with the neck extended. Standardized thyroid ultrasound technique  
15  
16 was adopted according to the method described by Fuse et al<sup>25</sup>. Discrete lesion(s)  
17  
18 within the thyroid gland that was palpably and/or ultrasonographically distinct from  
19  
20 the surrounding thyroid parenchyma were defined as thyroid nodule(s)<sup>26</sup>. In case of  
21  
22 abnormality in the sonographic examination of the thyroid, parents of the children  
23  
24 would receive a written note describing the abnormal results of the examination and  
25  
26 be advised to take their children to visit a physician. All participants were categorized  
27  
28 as having no nodule, having nodule(s) (solitary nodule, and multiple nodules)  
29  
30 according to their thyroid nodule detection status.  
31  
32  
33  
34  
35  
36  
37  
38

### 39 **Urine and salt samples collection and iodine concentration analyses**

40  
41 First morning urine sample was collected for each participant. Students were also  
42  
43 asked to bring a salt sample of more than 20g from home for iodine measurement.

44  
45 Urinary iodine concentration (UIC) was determined following the method proposed  
46  
47 by the Ministry of Health of the People's Republic of China (WS / T107. 2006, and  
48  
49 GB/T13025.7—1999)<sup>27</sup>. Salt iodine content was also measured using a national  
50  
51 standard method with a proper quality control<sup>28</sup> (GB/T 13025.7-1999). 10% urine  
52  
53 samples were assayed in duplicate and no statistical differences were observed as  
54  
55  
56  
57  
58  
59  
60



1  
2  
3  
4 compared with the primary results.

5  
6 Iodine nutrition status was determined at a population level according to  
7  
8 WHO/UNICEF/ICCIDD: insufficient (UIC <100  $\mu$  g/L), sufficient (100-199  $\mu$  g/L),  
9  
10 more than adequate (200-299  $\mu$  g/L), and excessive ( $\geq$  300  $\mu$  g/L). Iodized salt  
11  
12 consumption status was grouped into two categories: non-iodized salt (<5 mg/kg) and  
13  
14 iodized salt ( $\geq$  5 mg/kg)<sup>29</sup>.  
15  
16

### 17 18 19 **Statistical analysis**

20  
21 ,Chi-square test was used to examine thyroid nodules in relation to sex, age, BMI,  
22  
23 iodized salt consumption status, urinary iodine level and study area. Multinomial  
24  
25 logistic regression analysis was used to examine the associations of various  
26  
27 anthropometric measurements with the frequency of thyroid nodules (no nodule,  
28  
29 solitary nodule, and multiple nodules). Due to a considerable day-to-day variation in  
30  
31 iodine excretion, one-spot urinary iodine level was not a proper indicator of iodine  
32  
33 status for individuals<sup>30-31</sup>. Therefore, in current analysis, iodized salt consumption  
34  
35 instead of iodine concentration in urine, was included in the multivariate models. We  
36  
37 also assessed the correlation between urinary iodine concentration (UIC) and iodized  
38  
39 salt consumption and observed a significantly higher level of UIC in children who  
40  
41 consumed iodized salt at home, suggesting that iodized salt consumption status could  
42  
43 be a good proxy for iodine nutrition at a population level. Multivariable logistic  
44  
45 regression models were then used to adjust for age, sex, and iodized salt consumption.  
46  
47 Potential effect modifications by sex, age and iodized salt consumption on the  
48  
49 associations of interest were also examined by including associated interaction terms  
50  
51  
52  
53  
54  
55  
56  
57  
58  
59  
60

1  
2  
3  
4 into the multivariate analysis.  
5

6 All analyses were performed by using SAS, version 9.3 software (SAS Institute, Inc.,  
7  
8 Cary, NC, USA), and all statistical significance was based on two-side probability.  
9  
10

## 11 12 13 **RESULTS**

14  
15  
16 Table 1 shows the demographic characteristics as well as iodine nutrition status for  
17  
18 the 1403 participants included in the analysis. The mean age was 9.54 ( $\pm 0.98$ ) years,  
19  
20 the median BMI was 17.05 (IQR: 15.55, 19.35) kg/m<sup>2</sup>, and the median UIC was  
21  
22 184.90 $\mu$ g/l.  
23  
24  
25  
26  
27  
28  
29  
30  
31  
32  
33  
34  
35  
36  
37  
38  
39  
40  
41  
42  
43  
44  
45  
46  
47  
48  
49  
50  
51  
52  
53  
54  
55  
56  
57  
58  
59  
60

Table 1. General characteristics for children from Shanghai, Haimen and Taizhou, China, 2014

|                  | Male |       | Female |       | $\chi^2$ | P     |
|------------------|------|-------|--------|-------|----------|-------|
|                  | No.  | %     | No.    | %     |          |       |
| Total            | 739  | 52.67 | 664    | 47.33 |          |       |
| Age<br>(years)   |      |       |        |       | 0.788    | 0.852 |
| 8                | 116  | 15.70 | 111    | 16.72 |          |       |
| 9                | 246  | 33.29 | 215    | 32.38 |          |       |
| 10               | 237  | 32.07 | 204    | 30.72 |          |       |
| 11               | 140  | 18.94 | 134    | 20.18 |          |       |
| BMI              |      |       |        |       | 11.56    | 0.003 |
| Normal           | 531  | 71.85 | 443    | 66.72 |          |       |
| Overweight       | 110  | 14.88 | 145    | 21.84 |          |       |
| Obese            | 98   | 13.26 | 76     | 11.45 |          |       |
| Area             |      |       |        |       | 6.182    | 0.046 |
| Minhang          | 294  | 39.78 | 226    | 34.04 |          |       |
| Haimen           | 234  | 31.66 | 214    | 32.23 |          |       |
| Yuhuan           | 211  | 28.55 | 224    | 33.73 |          |       |
| UIC( $\mu$ g/L)* |      |       |        |       | 4.198    | 0.241 |
| <100             | 122  | 17.35 | 132    | 20.63 |          |       |
| 100-199          | 282  | 40.11 | 226    | 35.31 |          |       |

|  |                            |     |       |     |       |       |       |
|--|----------------------------|-----|-------|-----|-------|-------|-------|
|  | 200-299                    | 171 | 23.14 | 158 | 24.69 |       |       |
|  | ≥300                       | 128 | 17.32 | 124 | 19.38 |       |       |
|  | Iodized salt consumption** |     |       |     |       | 0.015 | 0.901 |
|  | No                         | 250 | 36.39 | 235 | 36.72 |       |       |
|  | Yes                        | 437 | 63.61 | 405 | 63.28 |       |       |

\*60 missing: 36(60.00%) were male and 24(40.00%) were female.

\*\* 76 missing: 52(68.42%) were male and 24(31.58%) were female.

Thyroid nodule(s) were detected in 259 children, accounting for 18.46% of all the participants. Most nodules were accompanied by hypoechogenicity. Of the participants, 5.92% (83/1403) had solitary nodule and 12.54% (176/1403) had multiple thyroid nodules. The frequency of thyroid nodules showed no age or sex related difference (Table 2). The median UIC in children without nodules, with single nodule and multiple nodules were 187.80  $\mu$ g/L, 195.55  $\mu$ g/L, and 160.45  $\mu$ g/L, respectively. UIC was significantly lower in children with multiple nodules than those in the other two groups ( $X^2=7.44$ ,  $P=0.024$ ). The prevalence of multiple thyroid nodules was much higher in children consuming non-iodized salt than those consuming iodized salt.

Table 2. Comparison of the prevalence of thyroid nodules in different subgroups for children from Shanghai, Haimen and Taizhou, China, 2014

| Characteristics              | No.  | Nodule(s)          |                         | Total      | $\chi^2$ , <i>P</i> -value <sup>#</sup> | $\chi^2$ , <i>P</i> -value <sup>##</sup> |
|------------------------------|------|--------------------|-------------------------|------------|-----------------------------------------|------------------------------------------|
|                              |      | No nodule<br>N (%) | Solitary nodule (N (%)) |            |                                         |                                          |
| All                          | 1403 | 1144(81.54)        | 83(5.92)                | 176(12.54) | 259(18.46)                              |                                          |
| Sex                          |      |                    |                         |            | 3.95, 0.047                             | 4.264, 0.119                             |
| Male                         | 739  | 617(83.49)         | 37(5.01)                | 85(11.50)  | 122(16.51)                              |                                          |
| Female                       | 664  | 527(79.37)         | 46(6.93)                | 91(13.70)  | 137(20.63)                              |                                          |
| Age (years)                  |      |                    |                         |            | 9.11, 0.028                             | 11.61, 0.071                             |
| 8                            | 227  | 192(84.58)         | 12(5.29)                | 23(10.13)  | 35(15.42)                               |                                          |
| 9                            | 461  | 359(77.87)         | 34(7.38)                | 68(14.75)  | 102(22.13)                              |                                          |
| 10                           | 441  | 374(84.81)         | 24(5.44)                | 43(9.75)   | 67(15.19)                               |                                          |
| 11                           | 274  | 219(79.93)         | 13(4.74)                | 42(15.33)  | 55(20.07)                               |                                          |
| Iodized salt consumption*    |      |                    |                         |            | 6.85, 0.009                             | 12.46, 0.002                             |
| No                           | 485  | 380(78.35)         | 26(5.36)                | 79(16.29)  | 105(21.65)                              |                                          |
| Yes                          | 842  | 708(84.09)         | 52(6.18)                | 82(9.74)   | 134(15.91)                              |                                          |
| Urinary iodine( $\mu$ g/l)** |      |                    |                         |            | 13.00, 0.005                            | 13.20, 0.010                             |
| $\leq$ 100                   | 254  | 204(80.31)         | 12(4.72)                | 38(14.96)  | 50(19.69)                               |                                          |
| 100-200                      | 508  | 400(78.74)         | 31(6.10)                | 77(15.16)  | 108(21.26)                              |                                          |
| 200-300                      | 329  | 268(81.46)         | 37(6.37)                | 51(8.78)   | 61(18.54)                               |                                          |
| $>$ 300                      | 252  | 225(89.29)         |                         |            | 27(10.71)                               |                                          |
| Area                         |      |                    |                         |            | 142.11, $<$ 0.001                       | 155.80, $<$ 0.001                        |
| Shanghai                     | 520  | 344(66.15)         | 49(9.42)                | 127(24.42) | 176(33.85)                              |                                          |
| Haimen                       | 448  | 426(95.09)         | 20(4.46)                | 2(0.45)    | 22(4.91)                                |                                          |
| Taizhou                      | 435  | 374(85.95)         | 14(3.22)                | 47(10.80)  | 61(14.02)                               |                                          |

\* 76 missing

1  
2  
3  
4  
5  
6  
7  
8  
9  
10  
11  
12  
13  
14  
15  
16  
17  
18  
19  
20  
21  
22  
23  
24  
25  
26  
27  
28  
29  
30  
31  
32  
33  
34  
35  
36  
37  
38  
39  
40  
41  
42  
43  
44  
45  
46  
47  
48  
49

\*\* 60 missing

# Comparison between participants with/without thyroid nodule(s)

## Comparison among participants without nodule/ with solitary nodule/ with multiple nodules

For peer review only

1  
2  
3  
4 Based on BMI, 255(18.17%) were overweight and 174(12.40%) were obese. Girls  
5  
6 were more likely to be overweight than boys and the prevalence of overweight/obese  
7  
8 decreased with age in both sexes (P-trend: 0.033 for boys and 0.010 for girls). The  
9  
10 prevalences of solitary and multiple nodules in overweight subjects were 3.53%  
11  
12 (9/255) and 15.29% (39/255), while the corresponding prevalence were 20.48%  
13  
14 (17/174) and 14.77% (26/174) in obese ones, respectively.  
15  
16

17  
18 Multivariable analysis revealed significant associations of obesity with both solitary  
19  
20 nodule and multiple thyroid nodules (Table 3). As compared with normal weight  
21  
22 children, obese children experienced significantly higher risks for solitary and  
23  
24 multiple thyroid nodules. The association between obesity and multiple nodules  
25  
26 tended to be more evident in girls (OR: 2.10, 95% CI: 0.89, 4.89) than in boys (OR:  
27  
28 1.29, 95% CI: 0.62, 2.70) although both were not statistically significant. Associations  
29  
30 of multiple nodules with overweight (OR: 1.87, 95% CI: 1.07, 3.29) and obesity (OR:  
31  
32 2.00, 95%CI: 1.05, 3.78) were observed in children aged 8 or 9 years, but not in older  
33  
34 ones. Overweight was not significantly associated with solitary thyroid nodule in  
35  
36 general, which might be due to small number of children with this thyroid condition.  
37  
38 However, overweight children had an increased risk for multiple thyroid nodules (OR:  
39  
40 1.76, 95% CI :1.03, 3.02) only in iodized salt consumers.  
41  
42  
43  
44  
45  
46  
47  
48  
49  
50  
51  
52  
53  
54  
55  
56  
57  
58  
59  
60

Table 3. Multinomial logistic regression analysis of obesity and thyroid nodules for children from Shanghai, Haimen and Taizhou, China, 2014

|    |                            | Normal    |  |                 |      |                  |      | Overweight      |                         |                  |                         | Obesity         |                         |                  |                         |
|----|----------------------------|-----------|--|-----------------|------|------------------|------|-----------------|-------------------------|------------------|-------------------------|-----------------|-------------------------|------------------|-------------------------|
|    |                            | No nodule |  | Solitary nodule |      | Multiple nodules |      | Solitary nodule |                         | Multiple nodules |                         | Solitary nodule |                         | Multiple nodules |                         |
|    |                            | N         |  | N               | OR   | N                | OR   | N               | OR (95%CI) <sup>a</sup> | N                | OR (95%CI) <sup>a</sup> | N               | OR (95%CI) <sup>a</sup> | N                | OR (95%CI) <sup>a</sup> |
| 14 | All subjects*              | 806       |  | 57              |      | 111              |      | 9               |                         | 39               |                         | 39              |                         | 26               |                         |
| 15 | Model 1                    |           |  |                 | 1.00 |                  | 1.00 |                 | 0.62(0.30, 1.26)        |                  | 1.37(0.92, 2.03)        |                 | 1.84(1.04, 3.25)        |                  | 1.44(0.91, 2.30)        |
| 16 | Model 2                    |           |  |                 | 1.00 |                  | 1.00 |                 | 0.53(0.25, 1.13)        |                  | 1.33(0.88, 2.03)        |                 | 1.82(0.99, 3.36)        |                  | 1.62(0.98, 2.70)        |
| 17 | Model 3                    |           |  |                 | 1.00 |                  | 1.00 |                 | 0.54(0.25, 1.16)        |                  | 1.24(0.82, 1.88)        |                 | 2.07(1.16, 3.71)        |                  | 1.67(1.03, 2.70)        |
| 18 | Sex**                      |           |  |                 |      |                  |      |                 |                         |                  |                         |                 |                         |                  |                         |
| 19 | Male                       | 617       |  | 28              | 1.00 | 58               | 1.00 | 2               | 0.17(0.02, 1.28)        | 15               | 1.18(0.61, 2.26)        | 7               | 1.53(0.63, 3.71)        | 12               | 1.29(0.62, 2.70)        |
| 20 | Female                     | 527       |  | 29              | 1.00 | 53               | 1.00 | 7               | 0.77(0.33, 1.82)        | 24               | 1.49(0.86, 2.59)        | 10              | 2.09(0.89, 4.89)        | 14               | 2.10(1.03, 4.31)        |
| 21 | Age (years)#               |           |  |                 |      |                  |      |                 |                         |                  |                         |                 |                         |                  |                         |
| 22 | 8-9                        | 551       |  | 31              | 1.00 | 49               | 1.00 | 5               | 0.63(0.24, 1.68)        | 24               | 1.87(1.07, 3.29)        | 10              | 1.60(0.71, 3.57)        | 18               | 2.00(1.05, 3.78)        |
| 23 | 10-11                      | 593       |  | 26              | 1.00 | 62               | 1.00 | 4               | 0.46(0.14, 1.55)        | 15               | 0.95(0.50, 1.82)        | 7               | 2.05(0.80, 5.25)        | 8                | 1.05(0.43, 2.60)        |
| 24 | Iodized salt consumption## |           |  |                 |      |                  |      |                 |                         |                  |                         |                 |                         |                  |                         |
| 25 | Yes                        | 708       |  | 35              | 1.00 | 46               | 1.00 | 5               | 0.48(0.18, 1.27)        | 23               | 1.76(1.03, 3.02)        | 12              | 1.76(0.88, 3.54)        | 13               | 1.50(0.78, 2.90)        |
| 26 | No                         | 380       |  | 20              | 1.00 | 58               | 1.00 | 3               | 0.59(0.17, 2.08)        | 12               | 0.88(0.45, 1.75)        | 3               | 1.84(0.50, 6.79)        | 9                | 1.97(0.86, 4.48)        |

\* Model 1: univariate analysis

Model 2: adjustment for sex, age, iodized salt consumption

Model 3: adjustment for sex, age, urinary iodine concentration

\*\* Adjustment for age and iodized salt consumption

# Adjustment for sex and iodized salt consumption

## Adjustment for sex, and age



1  
2  
3  
4  
5  
6  
7  
8  
9  
10  
11  
12  
13  
14  
15  
16  
17  
18  
19  
20  
21  
22  
23  
24  
25  
26  
27  
28  
29  
30  
31  
32  
33  
34  
35  
36  
37  
38  
39  
40  
41  
42  
43  
44  
45  
46  
47  
48  
49  
50  
51  
52  
53  
54  
55  
56  
57  
58  
59  
60

Figures 2 presents multivariate-adjusted ORs and 95% confidence intervals for solitary and multiple thyroid nodules associated with the quintiles of BSA, WC, BMI, and WHR, respectively. After adjustment for sex, age, and iodized salt consumption status, BSA and WC were positively related to the risks of solitary and multiple nodules (p values for trend were 0.015 and 0.013, respectively). As compared with children in the lowest quintile, the ORs of solitary and multiple nodules were 2.45 (95% CI: 1.24, 4.87) and 2.76 (95% CI: 1.54, 4.97) for those in the highest quintile of BSA and 3.46 (95% CI: 1.54, 7.80) and 2.18 (95% CI: 1.27, 3.74) for those in the highest quintile of WC, respectively. The interaction between BSA and sex on thyroid nodules was not statistically significant (p-interaction: 0.785 for solitary nodule and 0.600 for multiple nodules).

The results for BMI and WHR were less consistent. BMI was positively associated with the risk of multiple nodules (p-trend=0.005), while WHR showed no association with either solitary or multiple nodules.

## DISCUSSION

In this large cross-sectional study of children living in iodine sufficient areas in East China, we observed a high prevalence of thyroid nodules and positive associations of obesity with both solitary and multiple thyroid nodules. Among several anthropometric measurements, BSA and WC were related to the risks for both solitary and multiple thyroid nodules. These findings were generally consistent across sex groups and independent of iodized salt consumption status.

1  
2  
3  
4 Thyroid nodule(s) is common in adults and its impact on thyroid cancer risk is still  
5  
6 unclear<sup>16</sup>. The prevalence of incidental thyroid nodules detected by ultrasound  
7  
8 examinations is high in adults (close to 50%) as well as in iodine-deficient countries<sup>3-5</sup>.  
9  
10  
11 However, few studies have investigated the prevalence, and the spectrum of  
12  
13 appearance of ultrasound-detected findings in children. Thyroid nodules were  
14  
15 identified in 1.65% of children aged 3 to 18 years in three Japanese prefectures, and  
16  
17 the prevalence increased with age with a female predominance<sup>32</sup>. The information  
18  
19 released by Fukushima Prefecture indicated that 2014 (1.15%) of 75216 Japanese  
20  
21 children aged 0-18 had thyroid nodules<sup>33</sup>. Avula et al. conducted a retrospective  
22  
23 analysis in 287 Canadian children (mean age=6.2) and detected only 1 child with  
24  
25 multiple thyroid nodules but 52(18%) children with thyroid abnormalities<sup>34</sup>. In  
26  
27 healthy Greek children living in an iodine-replete area, one or more nodules were  
28  
29 observed in 5.1% of them<sup>35</sup>. For 2410 children aged 6-17 years living in Hangzhou,  
30  
31 China, thyroid nodules were detected in 10.66% of them<sup>36</sup>. These results showed  
32  
33 much lower frequencies than those observed in the current study, in which thyroid  
34  
35 nodules existed in 18.46% of 1433 Chinese children with little age- and sex-variations.  
36  
37 Influencing factors include age composition, inter-observer variation, iodine intake,  
38  
39 socio-economic status and individual and/or family history, as well as detection  
40  
41 sensitivity and image quality of ultrasound machine<sup>32</sup>.  
42  
43  
44  
45  
46  
47  
48  
49  
50  
51  
52  
53  
54  
55  
56  
57  
58  
59  
60  
61  
62  
63  
64  
65  
66  
67  
68  
69  
70  
71  
72  
73  
74  
75  
76  
77  
78  
79  
80  
81  
82  
83  
84  
85  
86  
87  
88  
89  
90  
91  
92  
93  
94  
95  
96  
97  
98  
99  
100  
101  
102  
103  
104  
105  
106  
107  
108  
109  
110  
111  
112  
113  
114  
115  
116  
117  
118  
119  
120  
121  
122  
123  
124  
125  
126  
127  
128  
129  
130  
131  
132  
133  
134  
135  
136  
137  
138  
139  
140  
141  
142  
143  
144  
145  
146  
147  
148  
149  
150  
151  
152  
153  
154  
155  
156  
157  
158  
159  
160  
161  
162  
163  
164  
165  
166  
167  
168  
169  
170  
171  
172  
173  
174  
175  
176  
177  
178  
179  
180  
181  
182  
183  
184  
185  
186  
187  
188  
189  
190  
191  
192  
193  
194  
195  
196  
197  
198  
199  
200  
201  
202  
203  
204  
205  
206  
207  
208  
209  
210  
211  
212  
213  
214  
215  
216  
217  
218  
219  
220  
221  
222  
223  
224  
225  
226  
227  
228  
229  
230  
231  
232  
233  
234  
235  
236  
237  
238  
239  
240  
241  
242  
243  
244  
245  
246  
247  
248  
249  
250  
251  
252  
253  
254  
255  
256  
257  
258  
259  
260  
261  
262  
263  
264  
265  
266  
267  
268  
269  
270  
271  
272  
273  
274  
275  
276  
277  
278  
279  
280  
281  
282  
283  
284  
285  
286  
287  
288  
289  
290  
291  
292  
293  
294  
295  
296  
297  
298  
299  
300  
301  
302  
303  
304  
305  
306  
307  
308  
309  
310  
311  
312  
313  
314  
315  
316  
317  
318  
319  
320  
321  
322  
323  
324  
325  
326  
327  
328  
329  
330  
331  
332  
333  
334  
335  
336  
337  
338  
339  
340  
341  
342  
343  
344  
345  
346  
347  
348  
349  
350  
351  
352  
353  
354  
355  
356  
357  
358  
359  
360  
361  
362  
363  
364  
365  
366  
367  
368  
369  
370  
371  
372  
373  
374  
375  
376  
377  
378  
379  
380  
381  
382  
383  
384  
385  
386  
387  
388  
389  
390  
391  
392  
393  
394  
395  
396  
397  
398  
399  
400  
401  
402  
403  
404  
405  
406  
407  
408  
409  
410  
411  
412  
413  
414  
415  
416  
417  
418  
419  
420  
421  
422  
423  
424  
425  
426  
427  
428  
429  
430  
431  
432  
433  
434  
435  
436  
437  
438  
439  
440  
441  
442  
443  
444  
445  
446  
447  
448  
449  
450  
451  
452  
453  
454  
455  
456  
457  
458  
459  
460  
461  
462  
463  
464  
465  
466  
467  
468  
469  
470  
471  
472  
473  
474  
475  
476  
477  
478  
479  
480  
481  
482  
483  
484  
485  
486  
487  
488  
489  
490  
491  
492  
493  
494  
495  
496  
497  
498  
499  
500  
501  
502  
503  
504  
505  
506  
507  
508  
509  
510  
511  
512  
513  
514  
515  
516  
517  
518  
519  
520  
521  
522  
523  
524  
525  
526  
527  
528  
529  
530  
531  
532  
533  
534  
535  
536  
537  
538  
539  
540  
541  
542  
543  
544  
545  
546  
547  
548  
549  
550  
551  
552  
553  
554  
555  
556  
557  
558  
559  
560  
561  
562  
563  
564  
565  
566  
567  
568  
569  
570  
571  
572  
573  
574  
575  
576  
577  
578  
579  
580  
581  
582  
583  
584  
585  
586  
587  
588  
589  
590  
591  
592  
593  
594  
595  
596  
597  
598  
599  
600  
601  
602  
603  
604  
605  
606  
607  
608  
609  
610  
611  
612  
613  
614  
615  
616  
617  
618  
619  
620  
621  
622  
623  
624  
625  
626  
627  
628  
629  
630  
631  
632  
633  
634  
635  
636  
637  
638  
639  
640  
641  
642  
643  
644  
645  
646  
647  
648  
649  
650  
651  
652  
653  
654  
655  
656  
657  
658  
659  
660  
661  
662  
663  
664  
665  
666  
667  
668  
669  
670  
671  
672  
673  
674  
675  
676  
677  
678  
679  
680  
681  
682  
683  
684  
685  
686  
687  
688  
689  
690  
691  
692  
693  
694  
695  
696  
697  
698  
699  
700  
701  
702  
703  
704  
705  
706  
707  
708  
709  
710  
711  
712  
713  
714  
715  
716  
717  
718  
719  
720  
721  
722  
723  
724  
725  
726  
727  
728  
729  
730  
731  
732  
733  
734  
735  
736  
737  
738  
739  
740  
741  
742  
743  
744  
745  
746  
747  
748  
749  
750  
751  
752  
753  
754  
755  
756  
757  
758  
759  
760  
761  
762  
763  
764  
765  
766  
767  
768  
769  
770  
771  
772  
773  
774  
775  
776  
777  
778  
779  
780  
781  
782  
783  
784  
785  
786  
787  
788  
789  
790  
791  
792  
793  
794  
795  
796  
797  
798  
799  
800  
801  
802  
803  
804  
805  
806  
807  
808  
809  
810  
811  
812  
813  
814  
815  
816  
817  
818  
819  
820  
821  
822  
823  
824  
825  
826  
827  
828  
829  
830  
831  
832  
833  
834  
835  
836  
837  
838  
839  
840  
841  
842  
843  
844  
845  
846  
847  
848  
849  
850  
851  
852  
853  
854  
855  
856  
857  
858  
859  
860  
861  
862  
863  
864  
865  
866  
867  
868  
869  
870  
871  
872  
873  
874  
875  
876  
877  
878  
879  
880  
881  
882  
883  
884  
885  
886  
887  
888  
889  
890  
891  
892  
893  
894  
895  
896  
897  
898  
899  
900  
901  
902  
903  
904  
905  
906  
907  
908  
909  
910  
911  
912  
913  
914  
915  
916  
917  
918  
919  
920  
921  
922  
923  
924  
925  
926  
927  
928  
929  
930  
931  
932  
933  
934  
935  
936  
937  
938  
939  
940  
941  
942  
943  
944  
945  
946  
947  
948  
949  
950  
951  
952  
953  
954  
955  
956  
957  
958  
959  
960  
961  
962  
963  
964  
965  
966  
967  
968  
969  
970  
971  
972  
973  
974  
975  
976  
977  
978  
979  
980  
981  
982  
983  
984  
985  
986  
987  
988  
989  
990  
991  
992  
993  
994  
995  
996  
997  
998  
999  
1000

1  
2  
3 adults with inconsistent results<sup>37-38</sup>.

4  
5  
6 Obesity is a risk factor for several chronic conditions, as well as goiter in adults<sup>39</sup>. Its  
7  
8 impact on thyroid nodules has also been investigated by using different  
9  
10 anthropometric parameters in adults. Among various parameters, BMI was most  
11  
12 frequently used as a measure of general adiposity. It has been increasingly recognized  
13  
14 that the adverse effects of obesity relate not only to the amount but also to the  
15  
16 distribution of excess body fat. Therefore, the use of BMI alone to infer health risks in  
17  
18 Asians may underestimate the detrimental health effects of excess adiposity<sup>40</sup>. WHR  
19  
20 and WC were good proxy measures of central adiposity. It has been suggested that  
21  
22 WC is a better marker for total body adiposity than it is for visceral fat<sup>41</sup>. Another  
23  
24 study has shown that both WC and BMI appear to perform equally well for estimating  
25  
26 children and adolescents's total adiposity<sup>42</sup>. BSA is a better indicator of the circulating  
27  
28 blood volume, oxygen consumption, and basal energy expenditure than BMI<sup>37</sup> and  
29  
30 has been shown to be the best independent predictor of the thyroid volume in both  
31  
32 sexes.  
33  
34  
35  
36  
37  
38  
39

40  
41 Several studies have found significant associations between measures of obesity and  
42  
43 the risk of thyroid nodules. For example, a study conducted in Hangzhou, China  
44  
45 observed a prevalence of TN being 34.97% (33.97 for men and 36.92% for women)  
46  
47 and great WC as a risk factor for new TN in this iodine-adequate area<sup>2</sup>. Similar trends  
48  
49 were observed for females and males, but the association was not statistically  
50  
51 significant in men<sup>2</sup>, which was similar to our findings in children. Another study of  
52  
53 postmenopausal women also revealed that WC and BMI were associated with thyroid  
54  
55  
56  
57  
58  
59  
60

1  
2  
3  
4  
5  
6  
7  
8  
9  
10  
11  
12  
13  
14  
15  
16  
17  
18  
19  
20  
21  
22  
23  
24  
25  
26  
27  
28  
29  
30  
31  
32  
33  
34  
35  
36  
37  
38  
39  
40  
41  
42  
43  
44  
45  
46  
47  
48  
49  
50  
51  
52  
53  
54  
55  
56  
57  
58  
59  
60

nodules<sup>43</sup>. Large BMI was associated with nodule growth among older patients with multiple nodules and larger dominant nodules<sup>17</sup>. Study conducted by Shin et al linked thyroid nodular disease to WC for males and glycated hemoglobin for females<sup>44</sup>, suggesting potential sex disparity. The presence of insulin resistance (IR) was associated with larger thyroid gland volume and an increased prevalence of thyroid nodules<sup>45-46</sup>, which might be explained by obesity-related subclinical inflammation and an associated increase in levels of insulin-like growth factor-1(IGF-1)<sup>45</sup>. However, another study yielded conflicting results, which suggested that adult patients with normal weight or overweight based on BMI tended to have an increased risk of thyroid nodules, as compared with underweight or obese people<sup>38</sup>. Evidence in children had been relatively limited.

The prevalence of obesity and overweight in our study population was slightly higher than that in students from four Chinese megacities (25.6%)<sup>47</sup> but lower than urban students of similar age groups in the National Surveys on Chinese Students' Constitution and Health (37.0% for overweight and 20.3% for obesity)<sup>48</sup>. Our findings of increased risk for thyroid nodules in obese children are generally consistent with those in obese adults of other studies. The association of BSA with thyroid volume in children has been well established<sup>35</sup>, while its relation to thyroid nodules has been seldom explored. Kim et al.<sup>38</sup> examined 7763 healthy Korean individuals and observed a significantly smaller BSA in those with thyroid nodules compared to the others, which was opposite to our findings. Considering the great difference in BSA between adults and children, it need to be cautious to generalize the results to children

1  
2  
3  
4  
5  
6  
7  
8  
9  
10  
11  
12  
13  
14  
15  
16  
17  
18  
19  
20  
21  
22  
23  
24  
25  
26  
27  
28  
29  
30  
31  
32  
33  
34  
35  
36  
37  
38  
39  
40  
41  
42  
43  
44  
45  
46  
47  
48  
49  
50  
51  
52  
53  
54  
55  
56  
57  
58  
59  
60

<sup>16</sup>. Xu et.al<sup>36</sup> conducted a cross-sectional study in Hangzhou, China, and reported an OR of 2.97 (95% CI: 1.85 to 4.77) for thyroid nodules for children with average BSA or above as compared with those with less than average BSA. However, they did not collect the information on waist and hip circumferences and number of thyroid nodules. Therefore, it was not possible to determine different associations between WC, WHR and different kinds of nodules in that study. The potential effect of iodized salt consumption, and sex on the association of overweight and multiple nodules also needs further investigations.

The strengths of our study include large sample size, directly measured thyroid ultrasonography and anthropometric measurements following a standardized protocol, and the abilities to distinguish solitary and multiple nodules and to adjust for household iodized salt consumption status. Our study has several limitations. Firstly, we did not have any information on thyroid function. Therefore, we were unable to further search potential mechanisms that might explain the observed associations. Secondly, there were no information on the amount of salt, and milk consumption. In addition, the cross-sectional design prevents us from making causal inferences.

## CONCLUSION

In this cross-sectional study of a relatively lean children population, we found that elevated levels of general or abdominal adiposity, measured by BMI, BSA and WC, were associated with a significant increase in the risk of thyroid nodule(s), especially multiple nodules in girls and solitary nodule in boys. Our findings, along with those observed from adult populations, emphasize the importance of preventing excess

1  
2  
3 adiposity for primary prevention of thyroid nodules.  
4  
5  
6  
7

8  
9 **Contributors** NW, HF, CWF, PXH, MFS, QZ, and QWJ contributed to the study  
10  
11 design; NW, HF, CWF, PXH, MFS, FJ, QZ and QWJ contributed to data acquisition  
12  
13 and collection; NW, QZ, YC contributed to data analysis and interpretation; NW, QZ  
14  
15 and YC drafted the manuscript; all authors contributed to the preparation of the final  
16  
17 document, read and approved the final manuscript.  
18  
19

20  
21 **Funding** This work was supported by the Chinese National Natural Science  
22  
23 Foundation (No. 81602806), Shanghai Municipal Commission of Health and Family  
24  
25 Planning (No. 20144Y0104), and Shanghai Key Discipline Construction Project of  
26  
27 Shanghai Municipal Public Health (No. 15GWZK0801).  
28  
29

30  
31 **Competing interests** None declared.  
32  
33

34 **Ethics approval** The study was approved by the Ethical Review Board of the  
35  
36 School of Public Health of Fudan University (#2012-03-0350S).  
37  
38

39 **Provenance and peer review** Not commissioned; externally peer reviewed.  
40  
41

42 **Data sharing statement** No additional data are available.  
43  
44

45 **Open Access** This is an Open Access article distributed in accordance with the  
46  
47 Creative Commons Attribution Non Commercial (CC BY-NC 4.0) license, which  
48  
49 permits others to distribute, remix, adapt, build upon this work noncommercially, and  
50  
51 license their derivative works on different terms, provided the original work is  
52  
53 properly cited and the use is non-commercial. See: [http://](http://creativecommons.org/licenses/by-nc/4.0/)  
54  
55  
56  
57  
58  
59  
60

## REFERENCES

1. Aydin Y, Besir FH, Erkan ME, et al. Spectrum and prevalence of nodular thyroid diseases detected by ultrasonography in the Western Black Sea region of Turkey. *Medical Ultrasonography* 2014;16(2):100-06.
2. Yin J, Wang C, Shao Q, et al. Relationship between the Prevalence of Thyroid Nodules and Metabolic Syndrome in the Iodine-Adequate Area of Hangzhou, China: A Cross-Sectional and Cohort Study. *Int J Endocrinol* 2014;2014:675796.
3. Carle A, Krejbjerg A, Laurberg P. Epidemiology of nodular goitre. Influence of iodine intake. *Best Pract Res Clin Endoc Metab* 2014;28(4):465-79.
4. Ajmal S, Rapoport S, Battle HR, et al. The Natural History of the Benign Thyroid Nodule: What Is the Appropriate Follow-Up Strategy? *Journal of the American College of Surgeons* 2015;220(6):987-92.
5. Guo HW, Sun M, He W, et al. The prevalence of thyroid nodules and its relationship with metabolic parameters in a Chinese community-based population aged over 40 years. *Endocrine* 2014;45(2):230-35.
6. Luo J, McManus C, Chen H, et al. Are There Predictors of Malignancy in Patients with Multinodular Goiter? *J Surg Res* 2012;174(2):207-10.
7. Akushevich I, Kravchenko J, Ukrainseva S, et al. Time trends of incidence of age-associated diseases in the US elderly population: medicare-based analysis. *Age Ageing* 2013;42(4):494-500.
8. Huan Q, Wang K, Lou FC, et al. Epidemiological characteristics of thyroid nodules and risk factors for malignant nodules: a retrospective study from 6 304 surgical cases. *Chin Med J* 2014;127(12):2286-92.
9. Shin J, Kim MH, Yoon KH, et al. Relationship between metabolic syndrome and thyroid nodules in healthy Koreans. *Korean J Intern Med* 2016;31(1):98-105.
10. Teng WP, Shan ZY, Teng XC, et al. Effect of iodine intake on thyroid diseases in China. *New Engl J Med* 2006;354(26):2783-93.
11. Guignard R, Truong T, Rougier Y, et al. Alcohol drinking, tobacco smoking, and anthropometric characteristics as risk factors for thyroid cancer: A countrywide case-control study in New Caledonia. *Am J Epidemiol* 2007;166(10):1140-49.
12. Leitzmann MF, Brenner A, Moore SC, et al. Prospective study of body mass index, physical activity and thyroid cancer. *Int J Cancer* 2010;126(12):2947-56.
13. Samanic C, Chow WH, Gridley G, et al. Relation of body mass index to cancer risk in 362,552 Swedish men. *Cancer Causes Control* 2006;17(7):901-9.
14. Rapp K, Schroeder J, Klenk J, et al. Obesity and incidence of cancer: a large cohort study of over 145,000 adults in Austria. *Br J Cancer* 2005;93(9):1062-7.



15. Han JM, Kim TY, Jeon MJ, et al. Obesity is a risk factor for thyroid cancer in a large, ultrasonographically screened population. *Eur J Endocrinol* 2013;168(6):879-86.
16. Niedziela M. Thyroid nodules. *Best Pract Res Clin Endoc Metab* 2014;28(2):245-77.
17. Durante C, Costante G, Lucisano G, et al. The Natural History of Benign Thyroid Nodules. *JAMA-J Am Med Assoc* 2015;313(9):926-35.
18. LaFranchi SH. Inaugural Management Guidelines for Children with Thyroid Nodules and Differentiated Thyroid Cancer: Children Are Not Small Adults. *Thyroid* 2015;25(7):713-5.
19. Wang N, Zhou Y, Fu C, et al. Influence of Bisphenol A on Thyroid Volume and Structure Independent of Iodine in School Children. *PLoS One* 2015;10(10):e0141248.
20. Peixin H, Feng J, Xin F, et al. A cross-sectional study of urinary iodine and salt iodine content among schoolchildren and their families in Haimen City, Jiangsu Province. *Chinese Journal of Endemiology* 2014;6(33):654-56.
21. Liu Pu, Fang Hong, Wang Na, et al. Investigation on urinary and salt iodine levels of school-aged children in Minhang District of Shanghai. *Fudan University Journal of Medical Sciences* 2014;41(2):179-82.
22. Su Meifang, Wang Congyun, Li Songtao, et al. A cross-sectional study on urinary iodine and iodine content of salt among school children aged 8-10 years old in Yuhuan County, Zhejiang Province in 2012. *Journal of Hygiene Research* 2013;42(6):893-96.
23. Li H, Zong XN, Ji CY, et al. Body mass index cut-offs for overweight and obesity in Chinese children and adolescents aged 2 - 18 years. *Chin J Epidemiol* 2010;31(6):616-20.
24. Mosteller RD. Simplified Calculation of Body-Surface Area. *New Engl J Med* 1987;317(17):1098-98.
25. Fuse Y, Saito N, Tsuchiya T, et al. Smaller thyroid gland volume with high urinary iodine excretion in Japanese schoolchildren: normative reference values in an iodine-sufficient area and comparison with the WHO/ICCIDD reference. *Thyroid* 2007;17(2):145-55.
26. Cooper DS, Doherty GM, Haugen BR, et al. Revised American Thyroid Association management guidelines for patients with thyroid nodules and differentiated thyroid cancer. *Thyroid* 2009;19(11):1167-214.
27. National Committee of standards for endemic and parasites, Ministry of Health of Peoples republic of China. WS/T107-2006 Method for measuring iodine in urine by As<sup>3+</sup>-Ce<sup>4+</sup> catalytic spectrophotometry. Beijing: China Standard Press, 2006.
28. Tong YK HC, Li BQ, Li MH, Zhang NJ, Min SH, Fu SY General test method in



- 1  
2  
3 salt industry: determination of iodide ion (GB/T 13025.7-1999). Beijing,China:  
4 China Criteria Publishing House, 1999:1-5.  
5  
6 29. Ministry of Health of Peoples republic of China. GB160062-2008 Iodine  
7 Deficiency Disease elimination standard. Beijing, China: China Standard Press  
8 2008.  
9  
10 30. Zimmermann MB, Andersson M. Assessment of iodine nutrition in populations:  
11 past, present, and future. *Nutrition Reviews* 2012;70(10):553-70.  
12  
13 31. Jooste PL, Strydom E. Methods for determination of iodine in urine and salt. *Best*  
14 *Pract Res Clin Endocrinol Metab* 2010;24(1):77-88.  
15  
16 32. Hayashida N, Imaizumi M, Shimura H, et al. Thyroid Ultrasound Findings in  
17 Children from Three Japanese Prefectures: Aomori, Yamanashi and Nagasaki.  
18 *PLoS One* 2013;8(12) doi: e8322010.1371  
19  
20 33. Yasumura S, Hosoya M, Yamashita S, et al. Study protocol for the Fukushima  
21 Health Management Survey. *J Epidemiol* 2012;22(5):375-83.  
22  
23 34. Avula S, Daneman A, Navarro OM, et al. Incidental thyroid abnormalities  
24 identified on neck US for non-thyroid disorders. *Pediatr Radiol*  
25 2010;40(11):1774-80.  
26  
27 35. Kaloumenou I, Alevizaki M, Ladopoulos C, et al. Thyroid volume and  
28 echostructure in schoolchildren living in an iodine-replete area: relation to age,  
29 pubertal stage, and body mass index. *Thyroid* 2007;17(9):875-81.  
30  
31 36. Xu W, Chen Z, Li N, et al. Relationship of anthropometric measurements to  
32 thyroid nodules in a Chinese population. *BMJ Open* 2015;5(12):e008452.  
33  
34 37. Clero E, Leux C, Brindel P, et al. Pooled analysis of two case-control studies in  
35 New Caledonia and French Polynesia of body mass index and differentiated  
36 thyroid cancer: the importance of body surface area. *Thyroid*  
37 2010;20(11):1285-93.  
38  
39 38. Kim JY, Jung EJ, Park ST, et al. Body size and thyroid nodules in healthy Korean  
40 population. *J Korean Surg Soc* 2012;82(1):13-7.  
41  
42 39. Kocak M, Erem C, Deger O, et al. Current prevalence of goiter determined by  
43 ultrasonography and associated risk factors in a formerly iodine-deficient area of  
44 Turkey. *Endocrine* 2014;47(1):290-98.  
45  
46 40. WHO expert consultation. Appropriate body-mass index in Asian populations and  
47 its implications for policy and intervention strategies. *Lancet*  
48 2004;363(9412):902-02.  
49  
50 41. Sardinha LB, Santos DA, Silva AM, et al. A Comparison between BMI, Waist  
51 Circumference, and Waist-To-Height Ratio for Identifying Cardio-Metabolic Risk  
52 in Children and Adolescents. *PLoS One* 2016;11(2):e0149351.  
53  
54 42. Katzmarzyk PT, Bouchard C. Where is the beef? Waist circumference is more  
55 highly correlated with BMI and total body fat than with abdominal visceral fat in  
56  
57  
58  
59  
60

- 1  
2  
3 children. *Int J Obes (Lond)* 2014;38(6):753-4.  
4  
5 43. Zheng L, Yan WH, Kong Y, et al. An epidemiological study of risk factors of  
6 thyroid nodule and goiter in Chinese women. *International Journal of Clinical  
7 and Experimental Medicine* 2015;8(7):11379-87.  
8  
9 44. Shin J, Kim MH, Yoon KH, et al. Relationship between metabolic syndrome and  
10 thyroid nodules in healthy Koreans. *Korean Journal of Internal Medicine*  
11 2016;31(1):98-U211.  
12  
13 45. Balkan F, Onal ED, Usluogullari A, et al. "Is there any association between insulin  
14 resistance and thyroid cancer? : a case control study". *Endocrine*  
15 2014;45(1):55-60.  
16  
17 46. Ayturk S, GURSOY A, Kut A, et al. Metabolic syndrome and its components are  
18 associated with increased thyroid volume and nodule prevalence in a  
19 mild-to-moderate iodine-deficient area. *Eur J Endocrinol* 2009;161(4):599-605.  
20  
21 47. Jia P, Li M, Xue H, et al. School environment and policies, child eating behavior  
22 and overweight/obesity in urban China: the childhood obesity study in China  
23 megacities. *Int J Obes (Lond)* 2017;41(5):813-19.  
24  
25 48. Zhou Y, Wang S, Zhang Q, et al. Prevalence of overweight and obesity among  
26 children and adolescents increased rapidly in Chinese rural regions while level off  
27 in urban areas. *Int J Cardiol* 2016;223:61-62.  
28  
29  
30  
31  
32  
33  
34  
35  
36  
37  
38  
39  
40  
41  
42  
43  
44  
45  
46  
47  
48  
49  
50  
51  
52  
53  
54  
55  
56  
57  
58  
59  
60

1  
2  
3  
4  
5  
6  
7  
8  
9  
10  
11  
12  
13  
14  
15  
16  
17  
18  
19  
20  
21  
22  
23  
24  
25  
26  
27  
28  
29  
30  
31  
32  
33  
34  
35  
36  
37  
38  
39  
40  
41  
42  
43  
44  
45  
46  
47  
48  
49  
50  
51  
52  
53  
54  
55  
56  
57  
58  
59  
60

Figure 1. Flow chart for the study design

Figure 2. Associations of Different Physical Measurements (BSA, WC, BMI, and WHR) with Thyroid Nodules for children from Shanghai, Haimen and Taizhou, China, 2014

For peer review only

1  
2  
3  
4  
5  
6  
7  
8  
9  
10  
11  
12  
13  
14  
15  
16  
17  
18  
19  
20  
21  
22  
23  
24  
25  
26  
27  
28  
29  
30  
31  
32  
33  
34  
35  
36  
37  
38  
39  
40  
41  
42  
43  
44  
45  
46  
47  
48  
49  
50  
51  
52  
53  
54  
55  
56  
57  
58  
59  
60

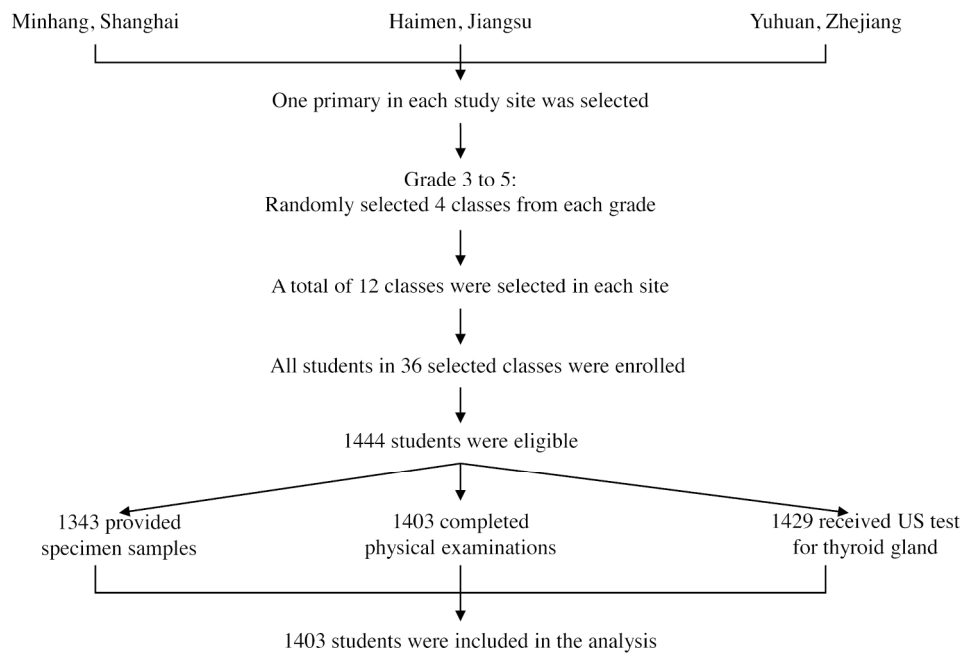

197x131mm (300 x 300 DPI)

view only

1  
2  
3  
4  
5  
6  
7  
8  
9  
10  
11  
12  
13  
14  
15  
16  
17  
18  
19  
20  
21  
22  
23  
24  
25  
26  
27  
28  
29  
30  
31  
32  
33  
34  
35  
36  
37  
38  
39  
40  
41  
42  
43  
44  
45  
46  
47  
48  
49  
50  
51  
52  
53  
54  
55  
56  
57  
58  
59  
60

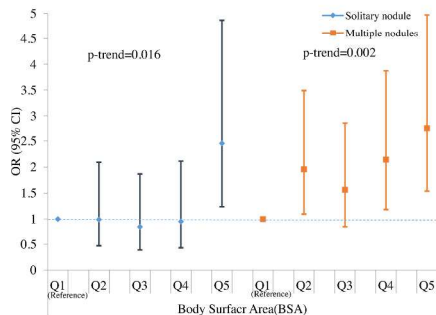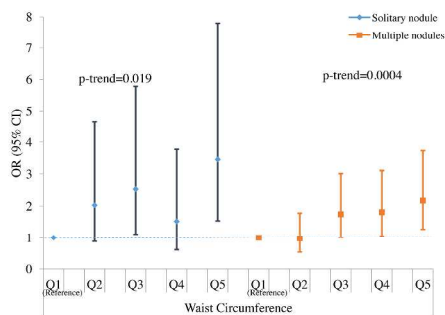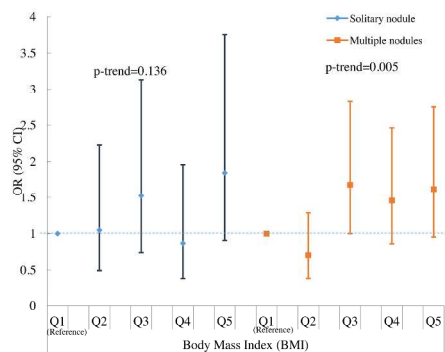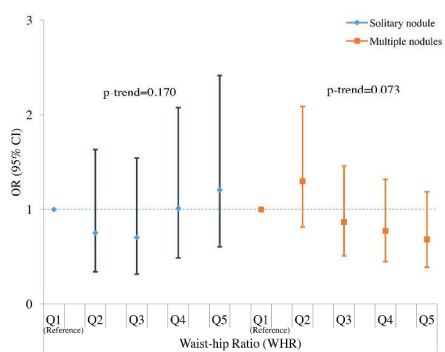

\*: Adjustment for age, sex, and iodized salt consumption status

330x299mm (300 x 300 DPI)

only

STROBE 2007 (v4) Statement—Checklist of items that should be included in reports of *cross-sectional studies*

| Section/Topic                | Item # | Recommendation                                                                                                                                                                       | Reported on page # |
|------------------------------|--------|--------------------------------------------------------------------------------------------------------------------------------------------------------------------------------------|--------------------|
| Title and abstract           | 1      | (a) Indicate the study's design with a commonly used term in the title or the abstract                                                                                               | 1                  |
|                              |        | (b) Provide in the abstract an informative and balanced summary of what was done and what was found                                                                                  | 2                  |
| <b>Introduction</b>          |        |                                                                                                                                                                                      |                    |
| Background/rationale         | 2      | Explain the scientific background and rationale for the investigation being reported                                                                                                 | 4                  |
| Objectives                   | 3      | State specific objectives, including any prespecified hypotheses                                                                                                                     | 4                  |
| <b>Methods</b>               |        |                                                                                                                                                                                      |                    |
| Study design                 | 4      | Present key elements of study design early in the paper                                                                                                                              | 5                  |
| Setting                      | 5      | Describe the setting, locations, and relevant dates, including periods of recruitment, exposure, follow-up, and data collection                                                      | 5,6                |
| Participants                 | 6      | (a) Give the eligibility criteria, and the sources and methods of selection of participants                                                                                          | 5                  |
| Variables                    | 7      | Clearly define all outcomes, exposures, predictors, potential confounders, and effect modifiers. Give diagnostic criteria, if applicable                                             | 5,6                |
| Data sources/<br>measurement | 8*     | For each variable of interest, give sources of data and details of methods of assessment (measurement). Describe comparability of assessment methods if there is more than one group | 6                  |
| Bias                         | 9      | Describe any efforts to address potential sources of bias                                                                                                                            | 6                  |
| Study size                   | 10     | Explain how the study size was arrived at                                                                                                                                            | 5                  |
| Quantitative variables       | 11     | Explain how quantitative variables were handled in the analyses. If applicable, describe which groupings were chosen and why                                                         | 7                  |
| Statistical methods          | 12     | (a) Describe all statistical methods, including those used to control for confounding                                                                                                | 7                  |
|                              |        | (b) Describe any methods used to examine subgroups and interactions                                                                                                                  | 7                  |
|                              |        | (c) Explain how missing data were addressed                                                                                                                                          | 7                  |
|                              |        | (d) If applicable, describe analytical methods taking account of sampling strategy                                                                                                   |                    |
|                              |        | (e) Describe any sensitivity analyses                                                                                                                                                | 7                  |
| <b>Results</b>               |        |                                                                                                                                                                                      | 8                  |

|                          |     |                                                                                                                                                                                                              |    |
|--------------------------|-----|--------------------------------------------------------------------------------------------------------------------------------------------------------------------------------------------------------------|----|
| Participants             | 13* | (a) Report numbers of individuals at each stage of study—eg numbers potentially eligible, examined for eligibility, confirmed eligible, included in the study, completing follow-up, and analysed            | 5  |
|                          |     | (b) Give reasons for non-participation at each stage                                                                                                                                                         | 5  |
|                          |     | (c) Consider use of a flow diagram                                                                                                                                                                           |    |
| Descriptive data         | 14* | (a) Give characteristics of study participants (eg demographic, clinical, social) and information on exposures and potential confounders                                                                     | 10 |
|                          |     | (b) Indicate number of participants with missing data for each variable of interest                                                                                                                          | 10 |
| Outcome data             | 15* | Report numbers of outcome events or summary measures                                                                                                                                                         | 10 |
| Main results             | 16  | (a) Give unadjusted estimates and, if applicable, confounder-adjusted estimates and their precision (eg, 95% confidence interval). Make clear which confounders were adjusted for and why they were included | 12 |
|                          |     | (b) Report category boundaries when continuous variables were categorized                                                                                                                                    | 6  |
|                          |     | (c) If relevant, consider translating estimates of relative risk into absolute risk for a meaningful time period                                                                                             |    |
| Other analyses           | 17  | Report other analyses done—eg analyses of subgroups and interactions, and sensitivity analyses                                                                                                               | 14 |
| <b>Discussion</b>        |     |                                                                                                                                                                                                              |    |
| Key results              | 18  | Summarise key results with reference to study objectives                                                                                                                                                     | 14 |
| Limitations              | 19  | Discuss limitations of the study, taking into account sources of potential bias or imprecision. Discuss both direction and magnitude of any potential bias                                                   | 18 |
| Interpretation           | 20  | Give a cautious overall interpretation of results considering objectives, limitations, multiplicity of analyses, results from similar studies, and other relevant evidence                                   | 17 |
| Generalisability         | 21  | Discuss the generalisability (external validity) of the study results                                                                                                                                        | 18 |
| <b>Other information</b> |     |                                                                                                                                                                                                              |    |
| Funding                  | 22  | Give the source of funding and the role of the funders for the present study and, if applicable, for the original study on which the present article is based                                                | 19 |

\*Give information separately for cases and controls in case-control studies and, if applicable, for exposed and unexposed groups in cohort and cross-sectional studies.

**Note:** An Explanation and Elaboration article discusses each checklist item and gives methodological background and published examples of transparent reporting. The STROBE checklist is best used in conjunction with this article (freely available on the Web sites of PLoS Medicine at <http://www.plosmedicine.org/>, Annals of Internal Medicine at <http://www.annals.org/>, and Epidemiology at <http://www.epidem.com/>). Information on the STROBE Initiative is available at [www.strobe-statement.org](http://www.strobe-statement.org).

# BMJ Open

## Associations of adiposity measurements with thyroid nodules in Chinese children living in iodine-sufficiency areas: an observational study

|                                 |                                                                                                                                                                                                                                                                                                                                                                           |
|---------------------------------|---------------------------------------------------------------------------------------------------------------------------------------------------------------------------------------------------------------------------------------------------------------------------------------------------------------------------------------------------------------------------|
| Journal:                        | <i>BMJ Open</i>                                                                                                                                                                                                                                                                                                                                                           |
| Manuscript ID                   | bmjopen-2017-016706.R2                                                                                                                                                                                                                                                                                                                                                    |
| Article Type:                   | Research                                                                                                                                                                                                                                                                                                                                                                  |
| Date Submitted by the Author:   | 20-Jul-2017                                                                                                                                                                                                                                                                                                                                                               |
| Complete List of Authors:       | Wang, Na; Fudan University, Key Laboratory of Public Health Safety of Ministry of Education, School of Public Health, Fudan University, Shanghai 200032, China<br>Fang, Hong<br>Fu, Chaowei<br>Huang, Peixin<br>Su, Meifang<br>Jiang, Feng<br>Zhao, Qi<br>Chen, Yue; Faculty of Medicine, University of Ottawa, School of Epidemiology and Public Health<br>Jiang, Qingwu |
| <b>Primary Subject Heading</b>: | Epidemiology                                                                                                                                                                                                                                                                                                                                                              |
| Secondary Subject Heading:      | Paediatrics, Nutrition and metabolism                                                                                                                                                                                                                                                                                                                                     |
| Keywords:                       | adiposity, thyroid nodule(s), children, iodine                                                                                                                                                                                                                                                                                                                            |
|                                 |                                                                                                                                                                                                                                                                                                                                                                           |

SCHOLARONE™  
Manuscripts



1  
2  
3  
4 **Associations of adiposity measurements with thyroid nodules in**  
5  
6 **Chinese children living in iodine-sufficiency areas: an observational**  
7  
8 **study**  
9

10  
11  
12 **Na Wang<sup>1</sup>, Hong Fang<sup>2</sup>, Chaowei Fu<sup>1</sup>, Peixin Huang<sup>3</sup>, Meifang Su<sup>4</sup>, Feng Jiang<sup>1</sup>,**  
13 **Qi Zhao<sup>1\*</sup>, Yue Chen<sup>5</sup>, Qingwu Jiang<sup>1</sup>**  
14

15  
16 1 Department of Epidemiology, School of Public Health, Key Laboratory of Public  
17 Health Safety of Ministry of Education, Fudan University, Shanghai, China  
18

19  
20 2 Department of Chronic Disease Control and Prevention, Shanghai Minhang Center  
21 for Disease Control and Prevention, Shanghai, China  
22

23  
24 3 Department of Chronic Disease Control and Prevention, Haimen City Center for  
25 Disease Control and Prevention, Haimen, China  
26

27  
28 4 Department of Chronic Disease Control and Prevention, Yuhuan County Center of  
29 Disease Control and Prevention, Taizhou, China  
30

31  
32 5 School of Epidemiology and Public Health, Faculty of Medicine, University of  
33 Ottawa, Ottawa, Canada  
34

35 \* Author to whom correspondence should be address; E-mail: [zhaoqi@shmu.edu.cn](mailto:zhaoqi@shmu.edu.cn)  
36  
37 Tel: +86-21-54237355 Address: Room 421, Building 8, No.130 Dongan Road, Xuhui  
38 District, Shanghai 200032, China  
39

40 **Word Count:** 2940 **Figures:** 2 **Tables:**4  
41

42  
43 **Keywords:** adiposity, thyroid nodule(s), children, iodine  
44  
45  
46  
47  
48  
49  
50  
51  
52  
53  
54  
55  
56  
57  
58  
59  
60

## Abstract

**Objectives:** Obesity has been found to be associated with an elevated risk of thyroid nodule(s), mainly in adults; however, evidence for this association in children was limited. The objective of this study was to investigate the association of adiposity and thyroid nodule(s) in children living in iodine-sufficiency areas.

**Setting and participants:** We conducted a cross-sectional study of 1,403 Chinese children living in the East Coast of China in 2014.

**Outcome measures:** Anthropometric measures, including height, weight, and waist and hip circumferences were taken and body mass index (BMI), body surface area (BSA), and waist-hip-ratio (WHR) were then calculated. Thyroid ultrasonography was performed to assess thyroid volume and nodules.

**Results:** Based on BMI, 255 (18.17%) children were overweight and 174 (12.40%) were obese. Thyroid nodule(s) was detected in 18.46% of all participants and showed little age- and sex-variations. As compared with normal weight children, obese children experienced significantly higher risks for solitary (OR: 2.07 (95% CI: 1.16, 3.71)) and multiple (OR: 1.67 (95%CI: 1.03, 2.70)) thyroid nodules. Similar associations with thyroid nodule(s) were observed with adiposity measured by waist circumference (WC) and BSA, but not WHR. There were no notable differences in the associations between children consuming iodized and non-iodized salt.

**Conclusions:** These findings provide further evidence that childhood obesity is associated with the risk for thyroid nodule(s).

**Strengths and limitations of this study:**

- Large sample size, directly measured thyroid ultrasonography and various anthropometric measurements following a standardized protocol.
- Detailed information distinguishing solitary and multiple nodules and household iodized salt consumption status at the individual level.
- Lack of information on thyroid function.

## INTRODUCTION

Thyroid nodule (TN) is a common thyroid disorder globally and the incidence has been increasing in recent decades<sup>1-2</sup>. Thyroid ultrasound investigations have documented very high prevalences (approaching 50%) of thyroid nodules worldwide<sup>3-5</sup>. Potential risk factors for thyroid nodules include age, sex, iodine intake<sup>3 6-8</sup>, demographic parameters, clinical history and waist circumference (WC)<sup>2 9</sup>. Both mildly deficient iodine intake and excessive iodine intake are risk factors for thyroid nodule(s) in normal subjects<sup>10</sup>.

Obesity is a known risk factor for a number of chronic conditions, and may also increase the risk of thyroid cancer<sup>11-15</sup>. The recent increase in thyroid nodules and thyroid cancer may partly be due to the epidemic of obesity<sup>9 16-17</sup>. Elevated thyroid stimulating hormone (TSH) levels and declined free thyroxin (FT4) levels have been observed in obese patients<sup>16</sup>. However, previous studies of the associations between obesity and thyroid were mainly conducted in adults and the results were not entirely consistent. Whether these observations from adults can be applied to children is not clear, particularly because the incidence of thyroid nodules is lower but the risk for malignancy is greater in children as compared to adults<sup>18</sup>.

In the current study, we conducted a large-scale epidemiological study to determine the associations of a number of anthropometric measurements including body mass index (BMI), body surface area (BSA), WC and waist-hip ratio (WHR) with solitary or multiple thyroid nodules in school age children.

## METHODS

### Study population

Randomized cluster sampling was used to selected subjects. Similar study methodologies have been reported for an earlier study<sup>19</sup>. Briefly, three coastal cities in east China (Minhang District in Shanghai, Haimen City in Jiangsu Province and Taizhou City in Zhejiang Province) were selected by purposive sampling. Previous studies have revealed an iodine sufficient status<sup>20-22</sup> along with distinguished iodized salt consumption proportions among three sites. One primary school (students were mainly local residents) was selected from each city to ensure a good representativeness. Four classes in each grade from grade 3 to grade 5 in these schools were randomly selected in 2014 and all students in 12 selected classes in each school were enrolled into this study (Figure 1). Among 1444 eligible children, an ultra-sound test for thyroid gland volume was performed on 1429 students and 1403 of them completed routine physical examinations. 1375 students provided first morning urine samples. Based on data from 1403 students who completed physical examinations and thyroid test, we determined the prevalence of thyroid nodule(s) and the influences of overweight and obesity. Written consent from parents or guardians of all participants were received and the study was approved by the Ethical Review Board of the School of Public Health of Fudan University.

## Study variables

The outcome variables in this study were having thyroid nodule(s) (no, yes) and number of thyroid nodules (no nodule, solitary nodule, multiple nodules). Adiposity measurements were explanatory variables, including body mass index, body surface area, waist circumferences and waist-hip-ratio. Sex, age, urinary iodine concentrations, and iodized salt consumption status were covariates in the multivariate regression models.

## Anthropometric measurements

Anthropometric measurements, including standing height (cm), weight (kg), and circumferences of the waist, hip and chest (cm) were taken by trained health professionals according to a standard protocol. The standing height was measured to the nearest 0.1cm without shoes. Weight was measured to the nearest 0.1kg using a digital weight scale. BMI was calculated as weight in kilograms divided by the square of height in meters and all participants were categorized into three groups of under/normal weight, overweight and obesity status according to the BMI growth reference values for Chinese children<sup>23</sup>. The cutoffs for overweight and obesity in boys were 17.8 and 20.1 for age 8, 18.5 and 21.1 for age 9, 19.5 and 22.2 for age 10, and 20.1 and 23.2 for age 11. The corresponding cutoffs for girls were 17.3 and 19.5, 17.9 and 20.4, 18.7 and 21.5, 19.6 and 22.7, respectively. Body surface area was calculated by using the following formula:  $BSA = (\text{Weight}^{0.425}) * (\text{Height}^{0.725}) * 0.007184$ <sup>24</sup>. Waist-hip-ratio was calculated as waist circumference divided by hip circumference. BSA, WC, and WHR were categorized into quintiles to assess their

1  
2  
3  
4 relations with thyroid nodules.  
5

### 6 **Thyroid ultrasonography**

7  
8 All participants received thyroid ultrasonography performed by experienced  
9 examiners at school using a real-time sector scanner with a 7.5-MHz/40-mm probe  
10 linear transducer. The ultrasonographic examination was carried out on the children  
11 lying on a desk with the neck extended. Standardized thyroid ultrasound technique  
12 was adopted according to the method described by Fuse et al<sup>25</sup>. Discrete lesion(s)  
13 within the thyroid gland that was palpably and/or ultrasonographically distinct from  
14 the surrounding thyroid parenchyma were defined as thyroid nodule(s)<sup>26</sup>. In case of  
15 abnormality in the sonographic examination of the thyroid, parents of the children  
16 would receive a written note describing the abnormal results of the examination and  
17 be advised to take their children to visit a physician. All participants were categorized  
18 as having no nodule, having nodule(s) (solitary nodule, and multiple nodules)  
19 according to their thyroid nodule detection status.  
20  
21  
22  
23  
24  
25  
26  
27  
28  
29  
30  
31  
32  
33  
34  
35  
36  
37  
38

### 39 **Urine and salt samples collection and iodine concentration analyses**

40 First morning urine sample was collected for each participant. Students were also  
41 asked to bring a salt sample of more than 20g from home for iodine measurement.  
42  
43

44 Urinary iodine concentration (UIC) was determined following the method proposed  
45 by the Ministry of Health of the People's Republic of China (WS / T107. 2006, and  
46 GB/T13025.7—1999)<sup>27</sup>. Salt iodine content was also measured using a national  
47 standard method with a proper quality control<sup>28</sup> (GB/T 13025.7-1999). 10% urine  
48 samples were assayed in duplicate and no statistical differences were observed as  
49  
50  
51  
52  
53  
54  
55  
56  
57  
58  
59  
60

1  
2  
3  
4 compared with the primary results.

5  
6 Iodine nutrition status was determined at a population level according to  
7  
8 WHO/UNICEF/ICCIDD: insufficient (UIC <100  $\mu$  g/L), sufficient (100-199  $\mu$  g/L),  
9  
10 more than adequate (200-299  $\mu$  g/L), and excessive ( $\geq$  300  $\mu$  g/L). Iodized salt  
11  
12 consumption status was grouped into two categories: non-iodized salt (<5 mg/kg) and  
13  
14 iodized salt ( $\geq$  5 mg/kg)<sup>29</sup>.  
15  
16

### 17 18 19 **Statistical analysis**

20  
21 ,Chi-square test was used to examine thyroid nodules in relation to sex, age, BMI,  
22  
23 iodized salt consumption status, urinary iodine level and study area. Multinomial  
24  
25 logistic regression analysis was used to examine the associations of various  
26  
27 anthropometric measurements with the frequency of thyroid nodules (no nodule,  
28  
29 solitary nodule, and multiple nodules). Due to a considerable day-to-day variation in  
30  
31 iodine excretion, one-spot urinary iodine level was not a proper indicator of iodine  
32  
33 status for individuals<sup>30-31</sup>. Therefore, in current analysis, iodized salt consumption  
34  
35 instead of iodine concentration in urine, was included in the multivariate models. We  
36  
37 also assessed the correlation between urinary iodine concentration (UIC) and iodized  
38  
39 salt consumption and observed a significantly higher level of UIC in children who  
40  
41 consumed iodized salt at home, suggesting that iodized salt consumption status could  
42  
43 be a good proxy for iodine nutrition at a population level. Multivariable logistic  
44  
45 regression models were then used to adjust for age, sex, and iodized salt consumption.  
46  
47 Potential effect modifications by sex, age and iodized salt consumption on the  
48  
49 associations of interest were also examined by including associated interaction terms  
50  
51  
52  
53  
54  
55  
56  
57  
58  
59  
60



1  
2  
3 into the multivariate analysis. We also re-analyzed the data by using mixed-effects  
4  
5  
6 with survey schools as random effect and observed no statistical significance of  
7  
8  
9 random effect in the GLMM (p=0.320).

10  
11 All analyses were performed by using SAS, version 9.3 software (SAS Institute, Inc.,  
12  
13 Cary, NC, USA), and all statistical significance was based on two-side probability.  
14  
15

## 16 17 18 19 **RESULTS**

20  
21 Table 1 shows the demographic characteristics as well as iodine nutrition status for  
22  
23 the 1403 participants included in the analysis. The mean age was 9.54 ( $\pm 0.98$ ) years,  
24  
25 the median BMI was 17.05 (IQR: 15.55, 19.35) kg/m<sup>2</sup>, and the median UIC was  
26  
27  
28  
29 184.90 $\mu$ g/l.  
30  
31  
32  
33  
34  
35  
36  
37  
38  
39  
40  
41  
42  
43  
44  
45  
46  
47  
48  
49  
50  
51  
52  
53  
54  
55  
56  
57  
58  
59  
60

Table 1. General characteristics for children from Shanghai, Haimen and Taizhou, China, 2014

|                  | Male |       | Female |       | $\chi^2$ | P     |
|------------------|------|-------|--------|-------|----------|-------|
|                  | No.  | %     | No.    | %     |          |       |
| Total            | 739  | 52.67 | 664    | 47.33 |          |       |
| Age<br>(years)   |      |       |        |       | 0.788    | 0.852 |
| 8                | 116  | 15.70 | 111    | 16.72 |          |       |
| 9                | 246  | 33.29 | 215    | 32.38 |          |       |
| 10               | 237  | 32.07 | 204    | 30.72 |          |       |
| 11               | 140  | 18.94 | 134    | 20.18 |          |       |
| BMI              |      |       |        |       | 11.56    | 0.003 |
| Normal           | 531  | 71.85 | 443    | 66.72 |          |       |
| Overweight       | 110  | 14.88 | 145    | 21.84 |          |       |
| Obese            | 98   | 13.26 | 76     | 11.45 |          |       |
| Area             |      |       |        |       | 6.182    | 0.046 |
| Minhang          | 294  | 39.78 | 226    | 34.04 |          |       |
| Haimen           | 234  | 31.66 | 214    | 32.23 |          |       |
| Yuhuan           | 211  | 28.55 | 224    | 33.73 |          |       |
| UIC( $\mu$ g/L)* |      |       |        |       | 4.198    | 0.241 |
| <100             | 122  | 17.35 | 132    | 20.63 |          |       |
| 100-199          | 282  | 40.11 | 226    | 35.31 |          |       |

|                            |     |       |     |       |             |
|----------------------------|-----|-------|-----|-------|-------------|
| 200-299                    | 171 | 23.14 | 158 | 24.69 |             |
| ≥300                       | 128 | 17.32 | 124 | 19.38 |             |
| Iodized salt consumption** |     |       |     |       | 0.015 0.901 |
| No                         | 250 | 36.39 | 235 | 36.72 |             |
| Yes                        | 437 | 63.61 | 405 | 63.28 |             |

\*60 missing: 36(60.00%) were male and 24(40.00%) were female.

\*\* 76 missing: 52(68.42%) were male and 24(31.58%) were female.

Thyroid nodule(s) were detected in 259 children, accounting for 18.46% of all the participants. Most nodules were accompanied by hypoechogenicity. Of the participants, 5.92% (83/1403) had solitary nodule and 12.54% (176/1403) had multiple thyroid nodules. The frequency of thyroid nodules showed no age or sex related difference (Table 2). The median UIC in children without nodules, with single nodule and multiple nodules were 187.80  $\mu$ g/L, 195.55  $\mu$ g/L, and 160.45  $\mu$ g/L, respectively. UIC was significantly lower in children with multiple nodules than those in the other two groups ( $X^2=7.44$ ,  $P=0.024$ ). The prevalence of multiple thyroid nodules was much higher in children consuming non-iodized salt than those consuming iodized salt.

Table 2. Comparison of the prevalence of thyroid nodules in different subgroups for children from Shanghai, Haimen and Taizhou, China, 2014

| Characteristics              | No.  | Nodule(s)          |                         | Total      | $\chi^2$ , <i>P</i> -value <sup>#</sup> | $\chi^2$ , <i>P</i> -value <sup>##</sup> |
|------------------------------|------|--------------------|-------------------------|------------|-----------------------------------------|------------------------------------------|
|                              |      | No nodule<br>N (%) | Solitary nodule (N (%)) |            |                                         |                                          |
| All                          | 1403 | 1144(81.54)        | 83(5.92)                | 176(12.54) | 259(18.46)                              |                                          |
| Sex                          |      |                    |                         |            | 3.95, 0.047                             | 4.264, 0.119                             |
| Male                         | 739  | 617(83.49)         | 37(5.01)                | 85(11.50)  | 122(16.51)                              |                                          |
| Female                       | 664  | 527(79.37)         | 46(6.93)                | 91(13.70)  | 137(20.63)                              |                                          |
| Age (years)                  |      |                    |                         |            | 9.11, 0.028                             | 11.61, 0.071                             |
| 8                            | 227  | 192(84.58)         | 12(5.29)                | 23(10.13)  | 35(15.42)                               |                                          |
| 9                            | 461  | 359(77.87)         | 34(7.38)                | 68(14.75)  | 102(22.13)                              |                                          |
| 10                           | 441  | 374(84.81)         | 24(5.44)                | 43(9.75)   | 67(15.19)                               |                                          |
| 11                           | 274  | 219(79.93)         | 13(4.74)                | 42(15.33)  | 55(20.07)                               |                                          |
| Iodized salt consumption*    |      |                    |                         |            | 6.85, 0.009                             | 12.46, 0.002                             |
| No                           | 485  | 380(78.35)         | 26(5.36)                | 79(16.29)  | 105(21.65)                              |                                          |
| Yes                          | 842  | 708(84.09)         | 52(6.18)                | 82(9.74)   | 134(15.91)                              |                                          |
| Urinary iodine( $\mu$ g/l)** |      |                    |                         |            | 13.00, 0.005                            | 18.65, 0.005                             |
| $\leq$ 100                   | 254  | 204(80.31)         | 12(4.72)                | 38(14.96)  | 50(19.69)                               |                                          |
| 100-200                      | 508  | 400(78.74)         | 31(6.10)                | 77(15.16)  | 108(21.26)                              |                                          |
| 200-300                      | 329  | 268(81.46)         | 37(6.37)                | 51(8.78)   | 61(18.54)                               |                                          |
| $>$ 300                      | 252  | 225(89.29)         | 12(4.76)                | 15(5.95)   | 27(10.71)                               |                                          |
| Area                         |      |                    |                         |            | 142.11, $<$ 0.001                       | 155.80, $<$ 0.001                        |
| Shanghai                     | 520  | 344(66.15)         | 49(9.42)                | 127(24.42) | 176(33.85)                              |                                          |
| Haimen                       | 448  | 426(95.09)         | 20(4.46)                | 2(0.45)    | 22(4.91)                                |                                          |
| Taizhou                      | 435  | 374(85.95)         | 14(3.22)                | 47(10.80)  | 61(14.02)                               |                                          |

\* 76 missing: 52(68.42%) were male and 24(31.58%) were female.

1  
2  
3  
4  
5  
6  
7  
8  
9  
10  
11  
12  
13  
14  
15  
16  
17  
18  
19  
20  
21  
22  
23  
24  
25  
26  
27  
28  
29  
30  
31  
32  
33  
34  
35  
36  
37  
38  
39  
40  
41  
42  
43  
44  
45  
46  
47  
48  
49

\*\* 60 missing: 36(60.00%) were male and 24(40.00%) were female.

# Comparison between participants with/without thyroid nodule(s)

## Comparison among participants without nodule/ with solitary nodule/ with multiple nodules

For peer review only

1  
2  
3  
4 Based on BMI, 255(18.17%) were overweight and 174(12.40%) were obese. Girls  
5  
6 were more likely to be overweight than boys and the prevalence of overweight/obese  
7  
8 decreased with age in both sexes (P-trend: 0.033 for boys and 0.010 for girls). The  
9  
10 prevalences of solitary and multiple nodules in overweight subjects were 3.53%  
11  
12 (9/255) and 15.29% (39/255), while the corresponding prevalence were 20.48%  
13  
14 (17/174) and 14.77% (26/174) in obese ones, respectively.  
15  
16

17  
18 Multivariable analysis revealed significant associations between obesity and the risk  
19  
20 of thyroid nodule(s) (Table 3). As compared with normal weight children, obese  
21  
22 children experienced a significantly higher risks of thyroid nodule(s) ((OR: 1.71 (95%  
23  
24 CI: 1.13, 2.59)). We observed a similar association of obesity with the risk of either  
25  
26 solitary nodule or multiple nodules (Table 4). When stratified by sex, only obese girls  
27  
28 experienced an increased risk for multiple nodules (OR: 2.10 (95% CI: 1.03, 4.31))  
29  
30 but the interaction of obesity with sex was not significant (p=0.494). Associations of  
31  
32 multiple nodules with overweight (OR: 1.87, 95% CI: 1.07, 3.29) and obesity (OR:  
33  
34 2.00, 95%CI: 1.05, 3.78) were observed in children aged 8 or 9 years, but not in older  
35  
36 ones. Overweight was not significantly associated with solitary thyroid nodule in  
37  
38 general, which might be due to small number of children with this thyroid condition.  
39  
40 Overweight children had an increased risk for multiple thyroid nodules (OR: 1.76, 95%  
41  
42 CI: 1.03, 3.02) only in iodized salt consumers.  
43  
44  
45  
46  
47  
48  
49  
50  
51  
52  
53  
54  
55  
56  
57  
58  
59  
60

1  
2  
3  
4  
5  
6  
7  
8  
9  
10  
11  
12  
13  
14  
15  
16  
17  
18  
19  
20  
21  
22  
23  
24  
25  
26  
27  
28  
29  
30  
31  
32  
33  
34  
35  
36  
37  
38  
39  
40  
41  
42  
43  
44  
45  
46  
47  
48  
49

Table 3 Multinomial logistic regression analysis of obesity and thyroid nodule(s) for children from Shanghai, Haimen and Taizhou, China, 2014

|                                        |         | Thyroid Nodule(s) |        |      |            |                  |                         |                  |
|----------------------------------------|---------|-------------------|--------|------|------------|------------------|-------------------------|------------------|
|                                        |         | No nodule         | Normal |      | Overweight |                  | Obesity                 |                  |
|                                        |         |                   | N      | N    | OR         | N                | OR (95%CI) <sup>a</sup> | N                |
| All subjects <sup>*</sup>              |         | 1144              | 168    |      | 48         |                  | 43                      |                  |
|                                        | Model 1 |                   |        | 1.00 |            | 1.11(0.78, 1.59) |                         | 1.58(1.07, 2.31) |
|                                        | Model 2 |                   |        | 1.00 |            | 1.00(0.69, 1.45) |                         | 1.82(1.22, 2.70) |
|                                        | Model 3 |                   |        | 1.00 |            | 1.04(0.71, 1.51) |                         | 1.71(1.13, 2.59) |
| Sex <sup>**</sup>                      | Male    | 576               | 80     | 1.00 | 14         | 0.83(0.45, 1.54) | 17                      | 1.39(0.77, 2.52) |
|                                        | Female  | 512               | 79     | 1.00 | 29         | 1.21(0.75, 1.96) | 20                      | 2.10(1.17, 3.79) |
| Age (years) <sup>#</sup>               | 8-9     | 519               | 76     | 1.00 | 27         | 1.37(0.83, 2.25) | 25                      | 1.87(1.10, 3.19) |
|                                        | 10-11   | 569               | 83     | 1.00 | 16         | 0.77(0.43, 1.38) | 12                      | 1.39(0.70, 2.75) |
| Iodized salt consumption <sup>##</sup> | Yes     | 708               | 81     | 1.00 | 28         | 1.20(0.75, 1.93) | 25                      | 1.62(0.98, 2.68) |
|                                        | No      | 380               | 78     | 1.00 | 15         | 0.81(0.43, 1.50) | 12                      | 1.94(0.92, 4.09) |

<sup>\*</sup> Model 1: univariate analysis  
 Model 2: adjustment for sex, age, iodized salt consumption  
 Model 3: adjustment for sex, age, urinary iodine concentration  
<sup>\*\*</sup> Adjustment for age and iodized salt consumption  
<sup>#</sup> Adjustment for sex and iodized salt consumption  
<sup>##</sup> Adjustment for sex, and age

Table 4. Multinomial logistic regression analysis of obesity and solitary and multiple thyroid nodules for children from Shanghai, Haimen and Taizhou, China, 2014

1  
2  
3  
4  
5  
6  
7  
8  
9  
10  
11  
12  
13  
14  
15  
16  
17  
18  
19  
20  
21  
22  
23  
24  
25  
26  
27  
28  
29  
30  
31  
32  
33  
34  
35  
36  
37  
38  
39  
40  
41  
42  
43  
44  
45  
46  
47  
48  
49

|                            |         | Normal    |    |                 |      | Overweight       |      |                 |                         | Obesity          |                         |                 |                         |                  |                         |
|----------------------------|---------|-----------|----|-----------------|------|------------------|------|-----------------|-------------------------|------------------|-------------------------|-----------------|-------------------------|------------------|-------------------------|
|                            |         | No nodule |    | Solitary nodule |      | Multiple nodules |      | Solitary nodule |                         | Multiple nodules |                         | Solitary nodule |                         | Multiple nodules |                         |
|                            |         | N         | OR | N               | OR   | N                | OR   | N               | OR (95%CI) <sup>a</sup> | N                | OR (95%CI) <sup>a</sup> | N               | OR (95%CI) <sup>a</sup> | N                | OR (95%CI) <sup>a</sup> |
| All subjects*              |         | 1144      |    | 57              |      | 111              |      | 9               |                         | 39               |                         | 17              |                         | 26               |                         |
|                            | Model 1 |           |    |                 | 1.00 |                  | 1.00 |                 | 0.62(0.30, 1.26)        |                  | 1.37(0.92, 2.03)        |                 | 1.84(1.04, 3.25)        |                  | 1.44(0.91, 2.30)        |
|                            | Model 2 |           |    |                 | 1.00 |                  | 1.00 |                 | 0.53(0.25, 1.13)        |                  | 1.33(0.88, 2.03)        |                 | 1.82(0.99, 3.36)        |                  | 1.62(0.98, 2.70)        |
|                            | Model 3 |           |    |                 | 1.00 |                  | 1.00 |                 | 0.54(0.25, 1.16)        |                  | 1.24(0.82, 1.88)        |                 | 2.07(1.16, 3.71)        |                  | 1.67(1.03, 2.70)        |
| Sex**                      | Male    | 576       |    | 26              | 1.00 | 54               | 1.00 | 1               | 0.17(0.02, 1.28)        | 13               | 1.18(0.61, 2.26)        | 7               | 1.53(0.63, 3.71)        | 10               | 1.29(0.62, 2.70)        |
|                            | Female  | 512       |    | 29              | 1.00 | 50               | 1.00 | 7               | 0.77(0.33, 1.82)        | 22               | 1.49(0.86, 2.59)        | 8               | 2.09(0.89, 4.89)        | 12               | 2.10(1.03, 4.31)        |
| Age (years)#               | 8-9     | 519       |    | 29              | 1.00 | 47               | 1.00 | 5               | 0.63(0.24, 1.68)        | 22               | 1.87(1.07, 3.29)        | 9               | 1.60(0.71, 3.57)        | 16               | 2.00(1.05, 3.78)        |
|                            | 10-11   | 569       |    | 26              | 1.00 | 57               | 1.00 | 3               | 0.46(0.14, 1.55)        | 13               | 0.95(0.50, 1.82)        | 6               | 2.05(0.80, 5.25)        | 6                | 1.05(0.43, 2.60)        |
| Iodized salt consumption## | Yes     | 708       |    | 35              | 1.00 | 46               | 1.00 | 5               | 0.48(0.18, 1.27)        | 23               | 1.76(1.03, 3.02)        | 12              | 1.76(0.88, 3.54)        | 13               | 1.50(0.78, 2.90)        |
|                            | No      | 380       |    | 20              | 1.00 | 58               | 1.00 | 3               | 0.59(0.17, 2.08)        | 12               | 0.88(0.45, 1.75)        | 3               | 1.84(0.50, 6.79)        | 9                | 1.97(0.86, 4.48)        |

\* Model 1: univariate analysis  
 Model 2: adjustment for sex, age, iodized salt consumption  
 Model 3: adjustment for sex, age, urinary iodine concentration  
 \*\* Adjustment for age and iodized salt consumption  
 # Adjustment for sex and iodized salt consumption  
 ## Adjustment for sex, and age



1  
2  
3  
4 Figures 2 presents multivariate-adjusted ORs and 95% confidence intervals for  
5  
6 solitary and multiple thyroid nodules associated with the quintiles of BSA, WC, BMI,  
7  
8 and WHR, respectively. After adjustment for sex, age, and iodized salt consumption  
9  
10 status, BSA and WC were positively related to the risks of solitary and multiple  
11  
12 nodule(s) (p values for trend for all the nodules together were 0.0001 and <0.0001,  
13  
14 respectively). As compared with children in the lowest quintile, the ORs of solitary  
15  
16 and multiple nodules were 2.45 (95% CI: 1.24, 4.87) and 2.76 (95% CI: 1.54, 4.97)  
17  
18 for those in the highest quintile of BSA and 3.46 (95% CI: 1.54, 7.80) and 2.18 (95%  
19  
20 CI: 1.27, 3.74) for those in the highest quintile of WC, respectively. The interaction  
21  
22 between BSA and sex on thyroid nodules was not statistically significant  
23  
24 (p-interaction: 0.785 for solitary nodule and 0.600 for multiple nodules).  
25  
26  
27  
28  
29

30  
31 The results for BMI and WHR were less consistent. BMI was positively associated  
32  
33 with the risk of multiple nodules (p-trend=0.005), while WHR showed no association  
34  
35 with either solitary or multiple nodules.  
36  
37  
38  
39  
40

## 41 **DISCUSSION**

42  
43 In this large cross-sectional study of children living in iodine sufficient areas in East  
44  
45 China, we observed a high prevalence of thyroid nodules and positive associations of  
46  
47 obesity with both solitary and multiple thyroid nodules. Among several  
48  
49 anthropometric measurements, BSA and WC were related to the risks for both solitary  
50  
51 and multiple thyroid nodules. These findings were generally consistent across sex  
52  
53 and multiple thyroid nodules. These findings were generally consistent across sex  
54  
55 groups and independent of iodized salt consumption status.  
56  
57  
58  
59  
60

1  
2  
3  
4 Thyroid nodule(s) is common in adults and its impact on thyroid cancer risk is still  
5  
6 unclear<sup>16</sup>. The prevalence of incidental thyroid nodules detected by ultrasound  
7  
8 examinations is high in adults (close to 50%) as well as in iodine-deficient countries<sup>3-5</sup>.  
9  
10  
11 However, few studies have investigated the prevalence, and the spectrum of  
12  
13 appearance of ultrasound-detected findings in children. Thyroid nodules were  
14  
15 identified in 1.65% of children aged 3 to 18 years in three Japanese prefectures, and  
16  
17 the prevalence increased with age with a female predominance<sup>32</sup>. The information  
18  
19 released by Fukushima Prefecture indicated that 2014 (1.15%) of 75216 Japanese  
20  
21 children aged 0-18 had thyroid nodules<sup>33</sup>. Avula et al. conducted a retrospective  
22  
23 analysis in 287 Canadian children (mean age=6.2) and detected only 1 child with  
24  
25 multiple thyroid nodules but 52(18%) children with thyroid abnormalities<sup>34</sup>. In  
26  
27 healthy Greek children living in an iodine-replete area, one or more nodules were  
28  
29 observed in 5.1% of them<sup>35</sup>. For 2410 children aged 6-17 years living in Hangzhou,  
30  
31 China, thyroid nodules were detected in 10.66% of them<sup>36</sup>. These results showed  
32  
33 much lower frequencies than those observed in the current study, in which thyroid  
34  
35 nodules existed in 18.46% of 1433 Chinese children with little age- and sex-variations.  
36  
37 Influencing factors include age composition, inter-observer variation, iodine intake,  
38  
39 socio-economic status and individual and/or family history, as well as detection  
40  
41 sensitivity and image quality of ultrasound machine<sup>32</sup>.  
42  
43  
44  
45  
46  
47  
48  
49  
50  
51  
52  
53  
54  
55  
56  
57  
58  
59  
60  
61  
62  
63  
64  
65  
66  
67  
68  
69  
70  
71  
72  
73  
74  
75  
76  
77  
78  
79  
80  
81  
82  
83  
84  
85  
86  
87  
88  
89  
90  
91  
92  
93  
94  
95  
96  
97  
98  
99  
100  
101  
102  
103  
104  
105  
106  
107  
108  
109  
110  
111  
112  
113  
114  
115  
116  
117  
118  
119  
120  
121  
122  
123  
124  
125  
126  
127  
128  
129  
130  
131  
132  
133  
134  
135  
136  
137  
138  
139  
140  
141  
142  
143  
144  
145  
146  
147  
148  
149  
150  
151  
152  
153  
154  
155  
156  
157  
158  
159  
160  
161  
162  
163  
164  
165  
166  
167  
168  
169  
170  
171  
172  
173  
174  
175  
176  
177  
178  
179  
180  
181  
182  
183  
184  
185  
186  
187  
188  
189  
190  
191  
192  
193  
194  
195  
196  
197  
198  
199  
200  
201  
202  
203  
204  
205  
206  
207  
208  
209  
210  
211  
212  
213  
214  
215  
216  
217  
218  
219  
220  
221  
222  
223  
224  
225  
226  
227  
228  
229  
230  
231  
232  
233  
234  
235  
236  
237  
238  
239  
240  
241  
242  
243  
244  
245  
246  
247  
248  
249  
250  
251  
252  
253  
254  
255  
256  
257  
258  
259  
260  
261  
262  
263  
264  
265  
266  
267  
268  
269  
270  
271  
272  
273  
274  
275  
276  
277  
278  
279  
280  
281  
282  
283  
284  
285  
286  
287  
288  
289  
290  
291  
292  
293  
294  
295  
296  
297  
298  
299  
300  
301  
302  
303  
304  
305  
306  
307  
308  
309  
310  
311  
312  
313  
314  
315  
316  
317  
318  
319  
320  
321  
322  
323  
324  
325  
326  
327  
328  
329  
330  
331  
332  
333  
334  
335  
336  
337  
338  
339  
340  
341  
342  
343  
344  
345  
346  
347  
348  
349  
350  
351  
352  
353  
354  
355  
356  
357  
358  
359  
360  
361  
362  
363  
364  
365  
366  
367  
368  
369  
370  
371  
372  
373  
374  
375  
376  
377  
378  
379  
380  
381  
382  
383  
384  
385  
386  
387  
388  
389  
390  
391  
392  
393  
394  
395  
396  
397  
398  
399  
400  
401  
402  
403  
404  
405  
406  
407  
408  
409  
410  
411  
412  
413  
414  
415  
416  
417  
418  
419  
420  
421  
422  
423  
424  
425  
426  
427  
428  
429  
430  
431  
432  
433  
434  
435  
436  
437  
438  
439  
440  
441  
442  
443  
444  
445  
446  
447  
448  
449  
450  
451  
452  
453  
454  
455  
456  
457  
458  
459  
460  
461  
462  
463  
464  
465  
466  
467  
468  
469  
470  
471  
472  
473  
474  
475  
476  
477  
478  
479  
480  
481  
482  
483  
484  
485  
486  
487  
488  
489  
490  
491  
492  
493  
494  
495  
496  
497  
498  
499  
500  
501  
502  
503  
504  
505  
506  
507  
508  
509  
510  
511  
512  
513  
514  
515  
516  
517  
518  
519  
520  
521  
522  
523  
524  
525  
526  
527  
528  
529  
530  
531  
532  
533  
534  
535  
536  
537  
538  
539  
540  
541  
542  
543  
544  
545  
546  
547  
548  
549  
550  
551  
552  
553  
554  
555  
556  
557  
558  
559  
560  
561  
562  
563  
564  
565  
566  
567  
568  
569  
570  
571  
572  
573  
574  
575  
576  
577  
578  
579  
580  
581  
582  
583  
584  
585  
586  
587  
588  
589  
590  
591  
592  
593  
594  
595  
596  
597  
598  
599  
600  
601  
602  
603  
604  
605  
606  
607  
608  
609  
610  
611  
612  
613  
614  
615  
616  
617  
618  
619  
620  
621  
622  
623  
624  
625  
626  
627  
628  
629  
630  
631  
632  
633  
634  
635  
636  
637  
638  
639  
640  
641  
642  
643  
644  
645  
646  
647  
648  
649  
650  
651  
652  
653  
654  
655  
656  
657  
658  
659  
660  
661  
662  
663  
664  
665  
666  
667  
668  
669  
670  
671  
672  
673  
674  
675  
676  
677  
678  
679  
680  
681  
682  
683  
684  
685  
686  
687  
688  
689  
690  
691  
692  
693  
694  
695  
696  
697  
698  
699  
700  
701  
702  
703  
704  
705  
706  
707  
708  
709  
710  
711  
712  
713  
714  
715  
716  
717  
718  
719  
720  
721  
722  
723  
724  
725  
726  
727  
728  
729  
730  
731  
732  
733  
734  
735  
736  
737  
738  
739  
740  
741  
742  
743  
744  
745  
746  
747  
748  
749  
750  
751  
752  
753  
754  
755  
756  
757  
758  
759  
760  
761  
762  
763  
764  
765  
766  
767  
768  
769  
770  
771  
772  
773  
774  
775  
776  
777  
778  
779  
780  
781  
782  
783  
784  
785  
786  
787  
788  
789  
790  
791  
792  
793  
794  
795  
796  
797  
798  
799  
800  
801  
802  
803  
804  
805  
806  
807  
808  
809  
810  
811  
812  
813  
814  
815  
816  
817  
818  
819  
820  
821  
822  
823  
824  
825  
826  
827  
828  
829  
830  
831  
832  
833  
834  
835  
836  
837  
838  
839  
840  
841  
842  
843  
844  
845  
846  
847  
848  
849  
850  
851  
852  
853  
854  
855  
856  
857  
858  
859  
860  
861  
862  
863  
864  
865  
866  
867  
868  
869  
870  
871  
872  
873  
874  
875  
876  
877  
878  
879  
880  
881  
882  
883  
884  
885  
886  
887  
888  
889  
890  
891  
892  
893  
894  
895  
896  
897  
898  
899  
900  
901  
902  
903  
904  
905  
906  
907  
908  
909  
910  
911  
912  
913  
914  
915  
916  
917  
918  
919  
920  
921  
922  
923  
924  
925  
926  
927  
928  
929  
930  
931  
932  
933  
934  
935  
936  
937  
938  
939  
940  
941  
942  
943  
944  
945  
946  
947  
948  
949  
950  
951  
952  
953  
954  
955  
956  
957  
958  
959  
960  
961  
962  
963  
964  
965  
966  
967  
968  
969  
970  
971  
972  
973  
974  
975  
976  
977  
978  
979  
980  
981  
982  
983  
984  
985  
986  
987  
988  
989  
990  
991  
992  
993  
994  
995  
996  
997  
998  
999  
1000

1  
2  
3 adults with inconsistent results<sup>37-38</sup>.

4  
5  
6 Obesity is a risk factor for several chronic conditions, as well as goiter in adults<sup>39</sup>. Its  
7  
8 impact on thyroid nodules has also been investigated by using different  
9  
10 anthropometric parameters in adults. Among various parameters, BMI was most  
11  
12 frequently used as a measure of general adiposity. It has been increasingly recognized  
13  
14 that the adverse effects of obesity relate not only to the amount but also to the  
15  
16 distribution of excess body fat. Therefore, the use of BMI alone to infer health risks in  
17  
18 Asians may underestimate the detrimental health effects of excess adiposity<sup>40</sup>. WHR  
19  
20 and WC were good proxy measures of central adiposity. It has been suggested that  
21  
22 WC is a better marker for total body adiposity than it is for visceral fat<sup>41</sup>. Another  
23  
24 study has shown that both WC and BMI appear to perform equally well for estimating  
25  
26 children and adolescents's total adiposity<sup>42</sup>. BSA is a better indicator of the circulating  
27  
28 blood volume, oxygen consumption, and basal energy expenditure than BMI<sup>37</sup> and  
29  
30 has been shown to be the best independent predictor of the thyroid volume in both  
31  
32 sexes.  
33  
34  
35  
36  
37  
38  
39

40  
41 Several studies have found significant associations between measures of obesity and  
42  
43 the risk of thyroid nodules. For example, a study conducted in Hangzhou, China  
44  
45 observed a prevalence of TN being 34.97% (33.97 for men and 36.92% for women)  
46  
47 and great WC as a risk factor for new TN in this iodine-adequate area<sup>2</sup>. Similar trends  
48  
49 were observed for females and males, but the association was not statistically  
50  
51 significant in men<sup>2</sup>, which was similar to our findings in children. Another study of  
52  
53 postmenopausal women also revealed that WC and BMI were associated with thyroid  
54  
55  
56  
57  
58  
59  
60

1  
2  
3  
4 nodules<sup>43</sup>. Large BMI was associated with nodule growth among older patients with  
5  
6 multiple nodules and larger dominant nodules<sup>17</sup>. Study conducted by Shin et al linked  
7  
8 thyroid nodular disease to WC for males and glycated hemoglobin for females<sup>44</sup>,  
9  
10 suggesting potential sex disparity. The presence of insulin resistance (IR) was  
11  
12 associated with larger thyroid gland volume and an increased prevalence of thyroid  
13  
14 nodules<sup>45-46</sup>, which might be explained by obesity-related subclinical inflammation  
15  
16 and an associated increase in levels of insulin-like growth factor-1(IGF-1)<sup>45</sup>. However,  
17  
18 another study yielded conflicting results, which suggested that adult patients with  
19  
20 normal weight or overweight based on BMI tended to have an increased risk of  
21  
22 thyroid nodules, as compared with underweight or obese people<sup>38</sup>. Evidence in  
23  
24 children had been relatively limited.  
25  
26  
27  
28  
29

30  
31 The prevalence of obesity and overweight in our study population was slightly higher  
32  
33 than that in students from four Chinese megacities (25.6%)<sup>47</sup> but lower than urban  
34  
35 students of similar age groups in the National Surveys on Chinese Students'  
36  
37 Constitution and Health (37.0% for overweight and 20.3% for obesity)<sup>48</sup>. Our findings  
38  
39 of increased risk for thyroid nodules in obese children are generally consistent with  
40  
41 those in obese adults of other studies. The association of BSA with thyroid volume in  
42  
43 children has been well established<sup>35</sup>, while its relation to thyroid nodules has been  
44  
45 seldom explored. Kim et al.<sup>38</sup> examined 7763 healthy Korean adults and observed a  
46  
47 significantly smaller BSA in those with thyroid nodules compared to the others,  
48  
49 which was opposite to our findings. Considering the great difference in BSA between  
50  
51 adults and children, it need to be cautious to generalize the results to children<sup>16</sup>. Xu  
52  
53  
54  
55  
56  
57  
58  
59  
60

1  
2  
3  
4 et.al<sup>36</sup> conducted a cross-sectional study in Hangzhou, China, and reported an OR of  
5  
6 2.97 (95% CI: 1.85 to 4.77) for thyroid nodules for children with average BSA or  
7  
8 above as compared with those with less than average BSA. However, they did not  
9  
10 collect the information on waist and hip circumferences and number of thyroid  
11  
12 nodules. Therefore, it was not possible to determine different associations between  
13  
14 WC, WHR and different kinds of nodules in that study. The potential interactive  
15  
16 effects of iodized salt consumption, and sex on the association between overweight  
17  
18 and multiple nodules also needs further investigations with a larger sample size.  
19  
20  
21 The strengths of our study include large sample size, directly measured thyroid  
22  
23 ultrasonography and anthropometric measurements following a standardized protocol,  
24  
25 and the abilities to distinguish solitary and multiple nodules and to adjust for  
26  
27 household iodized salt consumption status. Our study has several limitations. Firstly,  
28  
29 we did not have any information on thyroid function. Therefore, we were unable to  
30  
31 further search potential mechanisms that might explain the observed associations.  
32  
33 Secondly, there were no information on the amount of salt, and milk consumption. In  
34  
35 the current study, the number of children with solitary or multiple nodules was small  
36  
37 in some categories. In addition, the cross-sectional design prevents us from making  
38  
39 causal inferences.  
40  
41  
42  
43  
44  
45  
46  
47

## 48 49 **CONCLUSION**

50  
51 In this cross-sectional study of a relatively lean children population, we found that  
52  
53 elevated levels of general or abdominal adiposity, measured by BMI, BSA and WC,  
54  
55 were associated with a significant increase in the risk of thyroid nodule(s), especially  
56  
57  
58  
59  
60

1  
2  
3  
4 multiple nodules in girls and solitary nodule in boys. Our findings, along with those  
5  
6 observed from adult populations, emphasize the importance of preventing excess  
7  
8 adiposity for primary prevention of thyroid nodules.  
9

10  
11  
12  
13 **Contributors** NW, HF, CWF, PXH, MFS, QZ, and QWJ contributed to the study  
14  
15 design; NW, HF, CWF, PXH, MFS, FJ, QZ and QWJ contributed to data acquisition  
16  
17 and collection; NW, QZ, YC contributed to data analysis and interpretation; NW, QZ  
18  
19 and YC drafted the manuscript; all authors contributed to the preparation of the final  
20  
21 document, read and approved the final manuscript.  
22  
23

24  
25  
26 **Funding** This work was supported by the Chinese National Natural Science  
27  
28 Foundation (No. 81602806), Shanghai Municipal Commission of Health and Family  
29  
30 Planning (No. 20144Y0104), and Shanghai Key Discipline Construction Project of  
31  
32 Shanghai Municipal Public Health (No. 15GWZK0801).  
33

34  
35  
36 **Competing interests** None declared.  
37

38  
39 **Ethics approval** The study was approved by the Ethical Review Board of the  
40  
41 School of Public Health of Fudan University (#2012-03-0350S).  
42

43  
44 **Provenance and peer review** Not commissioned; externally peer reviewed.  
45

46  
47 **Data sharing statement** No additional data are available.  
48

49  
50 **Open Access** This is an Open Access article distributed in accordance with the  
51  
52 Creative Commons Attribution Non Commercial (CC BY-NC 4.0) license, which  
53  
54 permits others to distribute, remix, adapt, build upon this work noncommercially, and  
55  
56 license their derivative works on different terms, provided the original work is  
57  
58  
59  
60

1  
2  
3  
4  
5  
6  
7  
8  
9  
10  
11  
12  
13  
14  
15  
16  
17  
18  
19  
20  
21  
22  
23  
24  
25  
26  
27  
28  
29  
30  
31  
32  
33  
34  
35  
36  
37  
38  
39  
40  
41  
42  
43  
44  
45  
46  
47  
48  
49  
50  
51  
52  
53  
54  
55  
56  
57  
58  
59  
60

properly cited and the use is non-commercial. See: <http://creativecommons.org/licenses/by-nc/4.0/>

For peer review only

## REFERENCES

1. Aydin Y, Besir FH, Erkan ME, et al. Spectrum and prevalence of nodular thyroid diseases detected by ultrasonography in the Western Black Sea region of Turkey. *Medical Ultrasonography* 2014;16(2):100-06.
2. Yin J, Wang C, Shao Q, et al. Relationship between the Prevalence of Thyroid Nodules and Metabolic Syndrome in the Iodine-Adequate Area of Hangzhou, China: A Cross-Sectional and Cohort Study. *Int J Endocrinol* 2014;2014:675796.
3. Carle A, Krejbjerg A, Laurberg P. Epidemiology of nodular goitre. Influence of iodine intake. *Best Pract Res Clin Endoc Metab* 2014;28(4):465-79.
4. Ajmal S, Rapoport S, Battle HR, et al. The Natural History of the Benign Thyroid Nodule: What Is the Appropriate Follow-Up Strategy? *Journal of the American College of Surgeons* 2015;220(6):987-92.
5. Guo HW, Sun M, He W, et al. The prevalence of thyroid nodules and its relationship with metabolic parameters in a Chinese community-based population aged over 40 years. *Endocrine* 2014;45(2):230-35.
6. Luo J, McManus C, Chen H, et al. Are There Predictors of Malignancy in Patients with Multinodular Goiter? *J Surg Res* 2012;174(2):207-10.
7. Akushevich I, Kravchenko J, Ukrainseva S, et al. Time trends of incidence of age-associated diseases in the US elderly population: medicare-based analysis. *Age Ageing* 2013;42(4):494-500.
8. Huan Q, Wang K, Lou FC, et al. Epidemiological characteristics of thyroid nodules and risk factors for malignant nodules: a retrospective study from 6 304 surgical cases. *Chin Med J* 2014;127(12):2286-92.
9. Shin J, Kim MH, Yoon KH, et al. Relationship between metabolic syndrome and thyroid nodules in healthy Koreans. *Korean J Intern Med* 2016;31(1):98-105.
10. Teng WP, Shan ZY, Teng XC, et al. Effect of iodine intake on thyroid diseases in China. *New Engl J Med* 2006;354(26):2783-93.
11. Guignard R, Truong T, Rougier Y, et al. Alcohol drinking, tobacco smoking, and anthropometric characteristics as risk factors for thyroid cancer: A countrywide case-control study in New Caledonia. *Am J Epidemiol* 2007;166(10):1140-49.
12. Leitzmann MF, Brenner A, Moore SC, et al. Prospective study of body mass index, physical activity and thyroid cancer. *Int J Cancer* 2010;126(12):2947-56.
13. Samanic C, Chow WH, Gridley G, et al. Relation of body mass index to cancer risk in 362,552 Swedish men. *Cancer Causes Control* 2006;17(7):901-9.
14. Rapp K, Schroeder J, Klenk J, et al. Obesity and incidence of cancer: a large cohort study of over 145,000 adults in Austria. *Br J Cancer* 2005;93(9):1062-7.



15. Han JM, Kim TY, Jeon MJ, et al. Obesity is a risk factor for thyroid cancer in a large, ultrasonographically screened population. *Eur J Endocrinol* 2013;168(6):879-86.
16. Niedziela M. Thyroid nodules. *Best Pract Res Clin Endoc Metab* 2014;28(2):245-77.
17. Durante C, Costante G, Lucisano G, et al. The Natural History of Benign Thyroid Nodules. *JAMA-J Am Med Assoc* 2015;313(9):926-35.
18. LaFranchi SH. Inaugural Management Guidelines for Children with Thyroid Nodules and Differentiated Thyroid Cancer: Children Are Not Small Adults. *Thyroid* 2015;25(7):713-5.
19. Wang N, Zhou Y, Fu C, et al. Influence of Bisphenol A on Thyroid Volume and Structure Independent of Iodine in School Children. *PLoS One* 2015;10(10):e0141248.
20. Peixin H, Feng J, Xin F, et al. A cross-sectional study of urinary iodine and salt iodine content among schoolchildren and their families in Haimen City, Jiangsu Province. *Chinese Journal of Endemiology* 2014;6(33):654-56.
21. Liu Pu, Fang Hong, Wang Na, et al. Investigation on urinary and salt iodine levels of school-aged children in Minhang District of Shanghai. *Fudan University Journal of Medical Sciences* 2014;41(2):179-82.
22. Su Meifang, Wang Congyun, Li Songtao, et al. A cross-sectional study on urinary iodine and iodine content of salt among school children aged 8-10 years old in Yuhuan County, Zhejiang Province in 2012. *Journal of Hygiene Research* 2013;42(6):893-96.
23. Li H, Zong XN, Ji CY, et al. Body mass index cut-offs for overweight and obesity in Chinese children and adolescents aged 2 - 18 years. *Chin J Epidemiol* 2010;31(6):616-20.
24. Mosteller RD. Simplified Calculation of Body-Surface Area. *New Engl J Med* 1987;317(17):1098-98.
25. Fuse Y, Saito N, Tsuchiya T, et al. Smaller thyroid gland volume with high urinary iodine excretion in Japanese schoolchildren: normative reference values in an iodine-sufficient area and comparison with the WHO/ICCIDD reference. *Thyroid* 2007;17(2):145-55.
26. Cooper DS, Doherty GM, Haugen BR, et al. Revised American Thyroid Association management guidelines for patients with thyroid nodules and differentiated thyroid cancer. *Thyroid* 2009;19(11):1167-214.
27. National Committee of standards for endemic and parasites, Ministry of Health of Peoples republic of China. WS/T107-2006 Method for measuring iodine in urine by As<sup>3+</sup>-Ce<sup>4+</sup> catalytic spectrophotometry. Beijing: China Standard Press, 2006.
28. Tong YK HC, Li BQ, Li MH, Zhang NJ, Min SH, Fu SY General test method in

- 1  
2  
3 salt industry: determination of iodide ion (GB/T 13025.7-1999). Beijing,China:  
4 China Criteria Publishing House, 1999:1-5.  
5  
6 29. Ministry of Health of Peoples republic of China. GB160062-2008 Iodine  
7 Deficiency Disease elimination standard. Beijing, China: China Standard Press  
8 2008.  
9  
10 30. Zimmermann MB, Andersson M. Assessment of iodine nutrition in populations:  
11 past, present, and future. *Nutrition Reviews* 2012;70(10):553-70.  
12  
13 31. Jooste PL, Strydom E. Methods for determination of iodine in urine and salt. *Best*  
14 *Pract Res Clin Endocrinol Metab* 2010;24(1):77-88.  
15  
16 32. Hayashida N, Imaizumi M, Shimura H, et al. Thyroid Ultrasound Findings in  
17 Children from Three Japanese Prefectures: Aomori, Yamanashi and Nagasaki.  
18 *PLoS One* 2013;8(12) doi: e8322010.1371  
19  
20 33. Yasumura S, Hosoya M, Yamashita S, et al. Study protocol for the Fukushima  
21 Health Management Survey. *J Epidemiol* 2012;22(5):375-83.  
22  
23 34. Avula S, Daneman A, Navarro OM, et al. Incidental thyroid abnormalities  
24 identified on neck US for non-thyroid disorders. *Pediatr Radiol*  
25 2010;40(11):1774-80.  
26  
27 35. Kaloumenou I, Alevizaki M, Ladopoulos C, et al. Thyroid volume and  
28 echostructure in schoolchildren living in an iodine-replete area: relation to age,  
29 pubertal stage, and body mass index. *Thyroid* 2007;17(9):875-81.  
30  
31 36. Xu W, Chen Z, Li N, et al. Relationship of anthropometric measurements to  
32 thyroid nodules in a Chinese population. *BMJ Open* 2015;5(12):e008452.  
33  
34 37. Clero E, Leux C, Brindel P, et al. Pooled analysis of two case-control studies in  
35 New Caledonia and French Polynesia of body mass index and differentiated  
36 thyroid cancer: the importance of body surface area. *Thyroid*  
37 2010;20(11):1285-93.  
38  
39 38. Kim JY, Jung EJ, Park ST, et al. Body size and thyroid nodules in healthy Korean  
40 population. *J Korean Surg Soc* 2012;82(1):13-7.  
41  
42 39. Kocak M, Erem C, Deger O, et al. Current prevalence of goiter determined by  
43 ultrasonography and associated risk factors in a formerly iodine-deficient area of  
44 Turkey. *Endocrine* 2014;47(1):290-98.  
45  
46 40. WHO expert consultation. Appropriate body-mass index in Asian populations and  
47 its implications for policy and intervention strategies. *Lancet*  
48 2004;363(9412):902-02.  
49  
50 41. Sardinha LB, Santos DA, Silva AM, et al. A Comparison between BMI, Waist  
51 Circumference, and Waist-To-Height Ratio for Identifying Cardio-Metabolic Risk  
52 in Children and Adolescents. *PLoS One* 2016;11(2):e0149351.  
53  
54 42. Katzmarzyk PT, Bouchard C. Where is the beef? Waist circumference is more  
55 highly correlated with BMI and total body fat than with abdominal visceral fat in  
56  
57  
58  
59  
60

- 1  
2  
3 children. *Int J Obes (Lond)* 2014;38(6):753-4.
- 4 43. Zheng L, Yan WH, Kong Y, et al. An epidemiological study of risk factors of  
5 thyroid nodule and goiter in Chinese women. *International Journal of Clinical*  
6 *and Experimental Medicine* 2015;8(7):11379-87.
- 7  
8 44. Shin J, Kim MH, Yoon KH, et al. Relationship between metabolic syndrome and  
9 thyroid nodules in healthy Koreans. *Korean Journal of Internal Medicine*  
10 2016;31(1):98-U211.
- 11  
12 45. Balkan F, Onal ED, Usluogullari A, et al. "Is there any association between insulin  
13 resistance and thyroid cancer? : a case control study". *Endocrine*  
14 2014;45(1):55-60.
- 15  
16 46. Ayturk S, GURSOY A, Kut A, et al. Metabolic syndrome and its components are  
17 associated with increased thyroid volume and nodule prevalence in a  
18 mild-to-moderate iodine-deficient area. *Eur J Endocrinol* 2009;161(4):599-605.
- 19  
20 47. Jia P, Li M, Xue H, et al. School environment and policies, child eating behavior  
21 and overweight/obesity in urban China: the childhood obesity study in China  
22 megacities. *Int J Obes (Lond)* 2017;41(5):813-19.
- 23  
24 48. Zhou Y, Wang S, Zhang Q, et al. Prevalence of overweight and obesity among  
25 children and adolescents increased rapidly in Chinese rural regions while level off  
26 in urban areas. *Int J Cardiol* 2016;223:61-62.
- 27  
28  
29  
30  
31  
32  
33  
34  
35  
36  
37  
38  
39  
40  
41  
42  
43  
44  
45  
46  
47  
48  
49  
50  
51  
52  
53  
54  
55  
56  
57  
58  
59  
60

1  
2  
3  
4  
5  
6  
7  
8  
9  
10  
11  
12  
13  
14  
15  
16  
17  
18  
19  
20  
21  
22  
23  
24  
25  
26  
27  
28  
29  
30  
31  
32  
33  
34  
35  
36  
37  
38  
39  
40  
41  
42  
43  
44  
45  
46  
47  
48  
49  
50  
51  
52  
53  
54  
55  
56  
57  
58  
59  
60

Figure 1. Flow chart for the study design

Figure 2. Associations of Different Physical Measurements (BSA, WC, BMI, and WHR) with Thyroid Nodule(s) for children from Shanghai, Haimen and Taizhou, China, 2014

For peer review only

1  
2  
3  
4  
5  
6  
7  
8  
9  
10  
11  
12  
13  
14  
15  
16  
17  
18  
19  
20  
21  
22  
23  
24  
25  
26  
27  
28  
29  
30  
31  
32  
33  
34  
35  
36  
37  
38  
39  
40  
41  
42  
43  
44  
45  
46  
47  
48  
49  
50  
51  
52  
53  
54  
55  
56  
57  
58  
59  
60

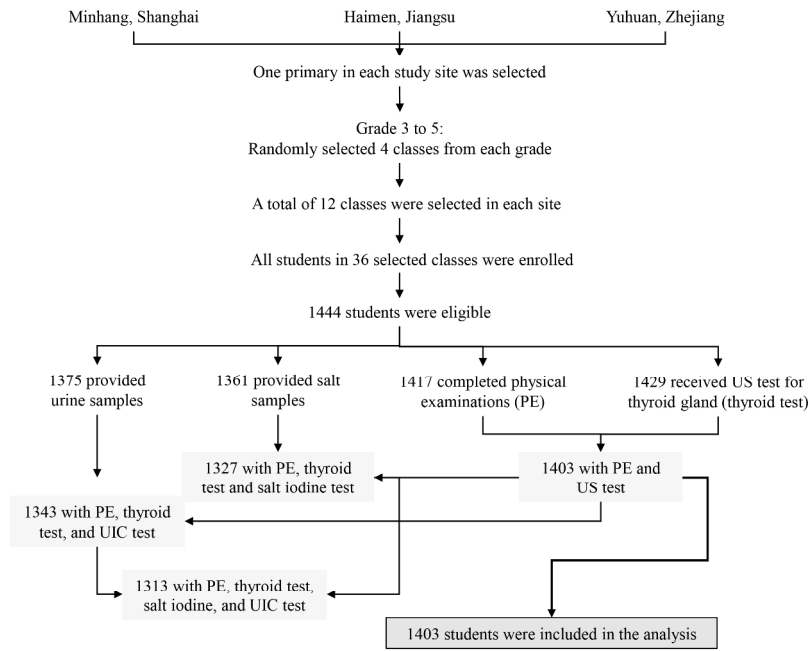

flow chart

254x190mm (300 x 300 DPI)

ew only

1  
2  
3  
4  
5  
6  
7  
8  
9  
10  
11  
12  
13  
14  
15  
16  
17  
18  
19  
20  
21  
22  
23  
24  
25  
26  
27  
28  
29  
30  
31  
32  
33  
34  
35  
36  
37  
38  
39  
40  
41  
42  
43  
44  
45  
46  
47  
48  
49  
50  
51  
52  
53  
54  
55  
56  
57  
58  
59  
60

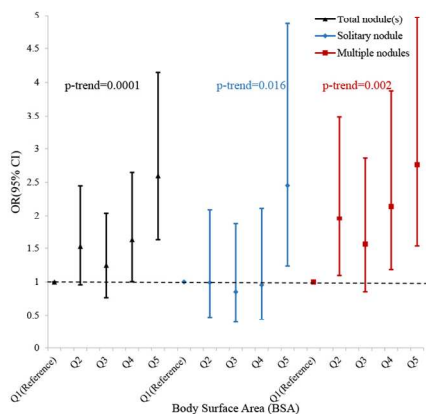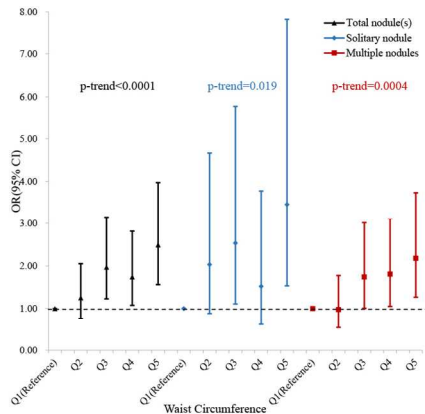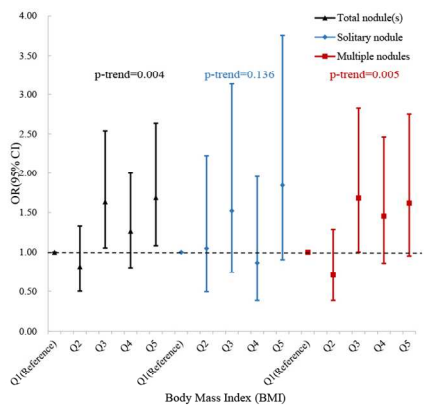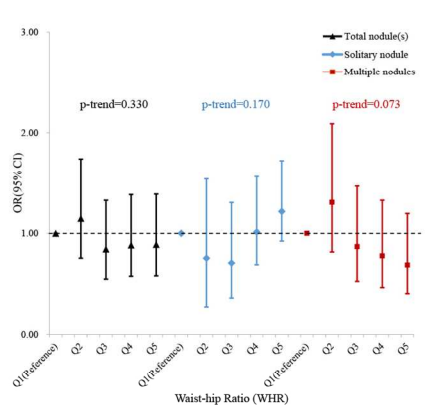

\*: Adjustment for age, sex, and iodized salt consumption status

140x140mm (300 x 300 DPI)

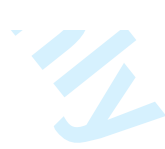

STROBE 2007 (v4) Statement—Checklist of items that should be included in reports of cross-sectional studies

| Section/Topic             | Item # | Recommendation                                                                                                                                                                       | Reported on page # |
|---------------------------|--------|--------------------------------------------------------------------------------------------------------------------------------------------------------------------------------------|--------------------|
| Title and abstract        | 1      | (a) Indicate the study’s design with a commonly used term in the title or the abstract                                                                                               | 1                  |
|                           |        | (b) Provide in the abstract an informative and balanced summary of what was done and what was found                                                                                  | 2                  |
| <b>Introduction</b>       |        |                                                                                                                                                                                      |                    |
| Background/rationale      | 2      | Explain the scientific background and rationale for the investigation being reported                                                                                                 | 4                  |
| Objectives                | 3      | State specific objectives, including any prespecified hypotheses                                                                                                                     | 4                  |
| <b>Methods</b>            |        |                                                                                                                                                                                      |                    |
| Study design              | 4      | Present key elements of study design early in the paper                                                                                                                              | 5                  |
| Setting                   | 5      | Describe the setting, locations, and relevant dates, including periods of recruitment, exposure, follow-up, and data collection                                                      | 5,6                |
| Participants              | 6      | (a) Give the eligibility criteria, and the sources and methods of selection of participants                                                                                          | 5                  |
| Variables                 | 7      | Clearly define all outcomes, exposures, predictors, potential confounders, and effect modifiers. Give diagnostic criteria, if applicable                                             | 5,6                |
| Data sources/ measurement | 8*     | For each variable of interest, give sources of data and details of methods of assessment (measurement). Describe comparability of assessment methods if there is more than one group | 6                  |
| Bias                      | 9      | Describe any efforts to address potential sources of bias                                                                                                                            | 6                  |
| Study size                | 10     | Explain how the study size was arrived at                                                                                                                                            | 5                  |
| Quantitative variables    | 11     | Explain how quantitative variables were handled in the analyses. If applicable, describe which groupings were chosen and why                                                         | 7                  |
| Statistical methods       | 12     | (a) Describe all statistical methods, including those used to control for confounding                                                                                                | 7                  |
|                           |        | (b) Describe any methods used to examine subgroups and interactions                                                                                                                  | 7                  |
|                           |        | (c) Explain how missing data were addressed                                                                                                                                          | 7                  |
|                           |        | (d) If applicable, describe analytical methods taking account of sampling strategy                                                                                                   |                    |
|                           |        | (e) Describe any sensitivity analyses                                                                                                                                                | 7                  |
| <b>Results</b>            |        |                                                                                                                                                                                      | 8                  |

|                          |     |                                                                                                                                                                                                              |    |
|--------------------------|-----|--------------------------------------------------------------------------------------------------------------------------------------------------------------------------------------------------------------|----|
| Participants             | 13* | (a) Report numbers of individuals at each stage of study—eg numbers potentially eligible, examined for eligibility, confirmed eligible, included in the study, completing follow-up, and analysed            | 5  |
|                          |     | (b) Give reasons for non-participation at each stage                                                                                                                                                         | 5  |
|                          |     | (c) Consider use of a flow diagram                                                                                                                                                                           |    |
| Descriptive data         | 14* | (a) Give characteristics of study participants (eg demographic, clinical, social) and information on exposures and potential confounders                                                                     | 10 |
|                          |     | (b) Indicate number of participants with missing data for each variable of interest                                                                                                                          | 10 |
| Outcome data             | 15* | Report numbers of outcome events or summary measures                                                                                                                                                         | 10 |
| Main results             | 16  | (a) Give unadjusted estimates and, if applicable, confounder-adjusted estimates and their precision (eg, 95% confidence interval). Make clear which confounders were adjusted for and why they were included | 12 |
|                          |     | (b) Report category boundaries when continuous variables were categorized                                                                                                                                    | 6  |
|                          |     | (c) If relevant, consider translating estimates of relative risk into absolute risk for a meaningful time period                                                                                             |    |
| Other analyses           | 17  | Report other analyses done—eg analyses of subgroups and interactions, and sensitivity analyses                                                                                                               | 14 |
| <b>Discussion</b>        |     |                                                                                                                                                                                                              |    |
| Key results              | 18  | Summarise key results with reference to study objectives                                                                                                                                                     | 14 |
| Limitations              | 19  | Discuss limitations of the study, taking into account sources of potential bias or imprecision. Discuss both direction and magnitude of any potential bias                                                   | 18 |
| Interpretation           | 20  | Give a cautious overall interpretation of results considering objectives, limitations, multiplicity of analyses, results from similar studies, and other relevant evidence                                   | 17 |
| Generalisability         | 21  | Discuss the generalisability (external validity) of the study results                                                                                                                                        | 18 |
| <b>Other information</b> |     |                                                                                                                                                                                                              |    |
| Funding                  | 22  | Give the source of funding and the role of the funders for the present study and, if applicable, for the original study on which the present article is based                                                | 19 |

\*Give information separately for cases and controls in case-control studies and, if applicable, for exposed and unexposed groups in cohort and cross-sectional studies.

**Note:** An Explanation and Elaboration article discusses each checklist item and gives methodological background and published examples of transparent reporting. The STROBE checklist is best used in conjunction with this article (freely available on the Web sites of PLoS Medicine at <http://www.plosmedicine.org/>, Annals of Internal Medicine at <http://www.annals.org/>, and Epidemiology at <http://www.epidem.com/>). Information on the STROBE Initiative is available at [www.strobe-statement.org](http://www.strobe-statement.org).



# BMJ Open

## Associations of adiposity measurements with thyroid nodules in Chinese children living in iodine-sufficiency areas: an observational study

|                                 |                                                                                                                                                                                                                                                                                                                                                                           |
|---------------------------------|---------------------------------------------------------------------------------------------------------------------------------------------------------------------------------------------------------------------------------------------------------------------------------------------------------------------------------------------------------------------------|
| Journal:                        | <i>BMJ Open</i>                                                                                                                                                                                                                                                                                                                                                           |
| Manuscript ID                   | bmjopen-2017-016706.R3                                                                                                                                                                                                                                                                                                                                                    |
| Article Type:                   | Research                                                                                                                                                                                                                                                                                                                                                                  |
| Date Submitted by the Author:   | 31-Aug-2017                                                                                                                                                                                                                                                                                                                                                               |
| Complete List of Authors:       | Wang, Na; Fudan University, Key Laboratory of Public Health Safety of Ministry of Education, School of Public Health, Fudan University, Shanghai 200032, China<br>Fang, Hong<br>Fu, Chaowei<br>Huang, Peixin<br>Su, Meifang<br>Jiang, Feng<br>Zhao, Qi<br>Chen, Yue; Faculty of Medicine, University of Ottawa, School of Epidemiology and Public Health<br>Jiang, Qingwu |
| <b>Primary Subject Heading</b>: | Epidemiology                                                                                                                                                                                                                                                                                                                                                              |
| Secondary Subject Heading:      | Paediatrics, Nutrition and metabolism                                                                                                                                                                                                                                                                                                                                     |
| Keywords:                       | adiposity, thyroid nodule(s), children, iodine                                                                                                                                                                                                                                                                                                                            |
|                                 |                                                                                                                                                                                                                                                                                                                                                                           |

SCHOLARONE™  
Manuscripts

1  
2  
3  
4 **Associations of adiposity measurements with thyroid nodules in**  
5  
6 **Chinese children living in iodine-sufficiency areas: an observational**  
7  
8 **study**  
9

10  
11  
12 **Na Wang<sup>1</sup>, Hong Fang<sup>2</sup>, Chaowei Fu<sup>1</sup>, Peixin Huang<sup>3</sup>, Meifang Su<sup>4</sup>, Feng Jiang<sup>1</sup>,**  
13 **Qi Zhao<sup>1\*</sup>, Yue Chen<sup>5</sup>, Qingwu Jiang<sup>1</sup>**  
14

15  
16 1 Department of Epidemiology, School of Public Health, Key Laboratory of Public  
17 Health Safety of Ministry of Education, Fudan University, Shanghai, China  
18

19  
20 2 Department of Chronic Disease Control and Prevention, Shanghai Minhang Center  
21 for Disease Control and Prevention, Shanghai, China  
22

23  
24 3 Department of Chronic Disease Control and Prevention, Haimen City Center for  
25 Disease Control and Prevention, Haimen, China  
26

27  
28 4 Department of Chronic Disease Control and Prevention, Yuhuan County Center of  
29 Disease Control and Prevention, Taizhou, China  
30

31  
32 5 School of Epidemiology and Public Health, Faculty of Medicine, University of  
33 Ottawa, Ottawa, Canada  
34

35 \* Author to whom correspondence should be address; E-mail: [zhaoqi@shmu.edu.cn](mailto:zhaoqi@shmu.edu.cn)  
36  
37 Tel: +86-21-54237355 Address: Room 421, Building 8, No.130 Dongan Road, Xuhui  
38 District, Shanghai 200032, China  
39

40 **Word Count:** 2940 **Figures:** 2 **Tables:**4  
41

42  
43 **Keywords:** adiposity, thyroid nodule(s), children, iodine  
44  
45  
46  
47  
48  
49  
50  
51  
52  
53  
54  
55  
56  
57  
58  
59  
60

## Abstract

**Objectives:** Obesity has been found to be associated with an elevated risk of thyroid nodule(s), mainly in adults; however, evidence for this association in children was limited. The objective of this study was to investigate the association of adiposity and thyroid nodule(s) in children living in iodine-sufficiency areas.

**Setting and participants:** We conducted a cross-sectional study of 1,403 Chinese children living in the East Coast of China in 2014.

**Outcome measures:** Anthropometric measures, including height, weight, and waist and hip circumferences were taken and body mass index (BMI), body surface area (BSA), and waist-hip-ratio (WHR) were then calculated. Thyroid ultrasonography was performed to assess thyroid volume and nodules.

**Results:** Based on BMI, 255 (18.17%) children were overweight and 174 (12.40%) were obese. Thyroid nodule(s) was detected in 18.46% of all participants and showed little age- and sex-variations. As compared with normal weight children, obese children experienced significantly higher risks for solitary (OR: 2.07 (95% CI: 1.16, 3.71)) and multiple (OR: 1.67 (95%CI: 1.03, 2.70)) thyroid nodules. Similar associations with thyroid nodule(s) were observed with adiposity measured by waist circumference (WC) and BSA, but not WHR. There were no notable differences in the associations between children consuming iodized and non-iodized salt.

**Conclusions:** These findings provide further evidence that childhood obesity is associated with the risk for thyroid nodule(s).

**Strengths and limitations of this study:**

- Large sample size, directly measured thyroid ultrasonography and various anthropometric measurements following a standardized protocol.
- Detailed information distinguishing solitary and multiple nodules and household iodized salt consumption status at the individual level.
- Lack of information on thyroid function.

## INTRODUCTION

Thyroid nodule (TN) is a common thyroid disorder globally and the incidence has been increasing in recent decades<sup>1-2</sup>. Thyroid ultrasound investigations have documented very high prevalences (approaching 50%) of thyroid nodules worldwide<sup>3-5</sup>. Potential risk factors for thyroid nodules include age, sex, iodine intake<sup>3 6-8</sup>, demographic parameters, clinical history and waist circumference (WC)<sup>2 9</sup>. Both mildly deficient iodine intake and excessive iodine intake are risk factors for thyroid nodule(s) in normal subjects<sup>10</sup>.

Obesity is a known risk factor for a number of chronic conditions, and may also increase the risk of thyroid cancer<sup>11-15</sup>. The recent increase in thyroid nodules and thyroid cancer may partly be due to the epidemic of obesity<sup>9 16-17</sup>. Elevated thyroid stimulating hormone (TSH) levels and declined free thyroxine (FT4) levels have been observed in obese patients<sup>16</sup>. However, previous studies of the associations between obesity and thyroid were mainly conducted in adults and the results were not entirely consistent. Whether these observations from adults can be applied to children is not clear, particularly because the incidence of thyroid nodules is lower but the risk for malignancy is greater in children as compared to adults<sup>18</sup>.

In the current study, we conducted a large-scale epidemiological study to determine the associations of a number of anthropometric measurements including body mass index (BMI), body surface area (BSA), WC and waist-hip ratio (WHR) with solitary or multiple thyroid nodules in school age children.

## METHODS

### Study population

Randomized cluster sampling was used to selected subjects. Similar study methodologies have been reported for an earlier study<sup>19</sup>. Briefly, three coastal cities in east China (Minhang District in Shanghai, Haimen City in Jiangsu Province and Taizhou City in Zhejiang Province) were selected by purposive sampling. Previous studies have revealed an iodine sufficient status<sup>20-22</sup> along with distinguished iodized salt consumption proportions among three sites. One primary school (students were mainly local residents) was selected from each city to ensure a good representativeness. Four classes in each grade from grade 3 to grade 5 in these schools were randomly selected in 2014 and all students in 12 selected classes in each school were enrolled into this study (Figure 1). Among 1444 eligible children, an ultra-sound test for thyroid gland volume was performed on 1429 students and 1403 of them completed routine physical examinations. 1375 students provided first morning urine samples. Based on data from 1403 students who completed physical examinations and thyroid test, we determined the prevalence of thyroid nodule(s) and the influences of overweight and obesity. Written consent from parents or guardians of all participants were received and the study was approved by the Ethical Review Board of the School of Public Health of Fudan University.

## Study variables

The outcome variables in this study were having thyroid nodule(s) (no, yes) and number of thyroid nodules (no nodule, solitary nodule, multiple nodules). Adiposity measurements were explanatory variables, including body mass index, body surface area, waist circumferences and waist-hip-ratio. Sex, age, urinary iodine concentrations, and iodized salt consumption status were covariates in the multivariate regression models.

## Anthropometric measurements

Anthropometric measurements, including standing height (cm), weight (kg), and circumferences of the waist, hip and chest (cm) were taken by trained health professionals according to a standard protocol. The standing height was measured to the nearest 0.1cm without shoes. Weight was measured to the nearest 0.1kg using a digital weight scale. BMI was calculated as weight in kilograms divided by the square of height in meters and all participants were categorized into three groups of under/normal weight, overweight and obesity status according to the BMI growth reference values for Chinese children<sup>23</sup>. The cutoffs for overweight and obesity in boys were 17.8 and 20.1 for age 8, 18.5 and 21.1 for age 9, 19.5 and 22.2 for age 10, and 20.1 and 23.2 for age 11. The corresponding cutoffs for girls were 17.3 and 19.5, 17.9 and 20.4, 18.7 and 21.5, 19.6 and 22.7, respectively. Body surface area was calculated by using the following formula:  $BSA = (Weight^{0.425}) * (Height^{0.725}) * 0.007184$ <sup>24</sup>. Waist-hip-ratio was calculated as waist circumference divided by hip circumference. BSA, WC, and WHR were categorized into quintiles to assess their

1  
2  
3  
4 relations with thyroid nodules.

### 6 **Thyroid ultrasonography**

7  
8 All participants received thyroid ultrasonography performed by experienced  
9 examiners at school using a real-time sector scanner with a 7.5-MHz/40-mm probe  
10 linear transducer. The ultrasonographic examination was carried out on the children  
11 lying on a desk with the neck extended. Standardized thyroid ultrasound technique  
12 was adopted according to the method described by Fuse et al<sup>25</sup>. Discrete lesion(s)  
13 within the thyroid gland that was palpably and/or ultrasonographically distinct from  
14 the surrounding thyroid parenchyma were defined as thyroid nodule(s)<sup>26</sup>. In case of  
15 abnormality in the sonographic examination of the thyroid, parents of the children  
16 would receive a written note describing the abnormal results of the examination and  
17 be advised to take their children to visit a physician. All participants were categorized  
18 as having no nodule, having nodule(s) (solitary nodule, and multiple nodules)  
19 according to their thyroid nodule detection status.  
20  
21  
22  
23  
24  
25  
26  
27  
28  
29  
30  
31  
32  
33  
34  
35  
36  
37  
38

### 39 **Urine and salt samples collection and iodine concentration analyses**

40 First morning urine sample was collected for each participant. Students were also  
41 asked to bring a salt sample of more than 20g from home for iodine measurement.  
42  
43

44 Urinary iodine concentration (UIC) was determined following the method proposed  
45 by the Ministry of Health of the People's Republic of China (WS / T107. 2006, and  
46 GB/T13025.7—1999)<sup>27</sup>. Salt iodine content was also measured using a national  
47 standard method with a proper quality control<sup>28</sup> (GB/T 13025.7-1999). 10% urine  
48 samples were assayed in duplicate and no statistical differences were observed as  
49  
50  
51  
52  
53  
54  
55  
56  
57  
58  
59  
60



1  
2  
3  
4 compared with the primary results.

5  
6 Iodine nutrition status was determined at a population level according to  
7  
8 WHO/UNICEF/ICCIDD: insufficient (UIC <100  $\mu$  g/L), sufficient (100-199  $\mu$  g/L),  
9  
10 more than adequate (200-299  $\mu$  g/L), and excessive ( $\geq$  300  $\mu$  g/L). Iodized salt  
11  
12 consumption status was grouped into two categories: non-iodized salt (<5 mg/kg) and  
13  
14 iodized salt ( $\geq$  5 mg/kg)<sup>29</sup>.  
15  
16

### 17 18 19 **Statistical analysis**

20  
21 ,Chi-square test was used to examine thyroid nodules in relation to sex, age, BMI,  
22  
23 iodized salt consumption status, urinary iodine level and study area. Multinomial  
24  
25 logistic regression analysis was used to examine the associations of various  
26  
27 anthropometric measurements with the frequency of thyroid nodules (no nodule,  
28  
29 solitary nodule, and multiple nodules). Due to a considerable day-to-day variation in  
30  
31 iodine excretion, one-spot urinary iodine level was not a proper indicator of iodine  
32  
33 status for individuals<sup>30-31</sup>. Therefore, in current analysis, iodized salt consumption  
34  
35 instead of iodine concentration in urine, was included in the multivariate models. We  
36  
37 also assessed the correlation between urinary iodine concentration (UIC) and iodized  
38  
39 salt consumption and observed a significantly higher level of UIC in children who  
40  
41 consumed iodized salt at home, suggesting that iodized salt consumption status could  
42  
43 be a good proxy for iodine nutrition at a population level. Multivariable logistic  
44  
45 regression models were then used to adjust for age, sex, and iodized salt consumption.  
46  
47 Potential effect modifications by sex, age and iodized salt consumption on the  
48  
49 associations of interest were also examined by including associated interaction terms  
50  
51  
52  
53  
54  
55  
56  
57  
58  
59  
60

1  
2  
3 into the multivariate analysis. We also re-analyzed the data by using mixed-effects  
4  
5  
6 with survey schools as random effect and observed no statistical significance of  
7  
8  
9 random effect in the GLMM (p=0.320).

10  
11 All analyses were performed by using SAS, version 9.3 software (SAS Institute, Inc.,  
12  
13 Cary, NC, USA), and all statistical significance was based on two-side probability.  
14  
15

## 16 17 18 19 **RESULTS**

20  
21 Table 1 shows the demographic characteristics as well as iodine nutrition status for  
22  
23 the 1403 participants included in the analysis. The mean age was 9.54 ( $\pm 0.98$ ) years,  
24  
25 the median BMI was 17.05 (IQR: 15.55, 19.35) kg/m<sup>2</sup>, and the median UIC was  
26  
27  
28  
29 184.90 $\mu$ g/l.  
30  
31  
32  
33  
34  
35  
36  
37  
38  
39  
40  
41  
42  
43  
44  
45  
46  
47  
48  
49  
50  
51  
52  
53  
54  
55  
56  
57  
58  
59  
60

Table 1. General characteristics for children from Shanghai, Haimen and Taizhou, China, 2014

|                  | Male |       | Female |       | $\chi^2$ | P     |
|------------------|------|-------|--------|-------|----------|-------|
|                  | No.  | %     | No.    | %     |          |       |
| Total            | 739  | 52.67 | 664    | 47.33 |          |       |
| Age<br>(years)   |      |       |        |       | 0.788    | 0.852 |
| 8                | 116  | 15.70 | 111    | 16.72 |          |       |
| 9                | 246  | 33.29 | 215    | 32.38 |          |       |
| 10               | 237  | 32.07 | 204    | 30.72 |          |       |
| 11               | 140  | 18.94 | 134    | 20.18 |          |       |
| BMI              |      |       |        |       | 11.56    | 0.003 |
| Normal           | 531  | 71.85 | 443    | 66.72 |          |       |
| Overweight       | 110  | 14.88 | 145    | 21.84 |          |       |
| Obese            | 98   | 13.26 | 76     | 11.45 |          |       |
| Area             |      |       |        |       | 6.182    | 0.046 |
| Minhang          | 294  | 39.78 | 226    | 34.04 |          |       |
| Haimen           | 234  | 31.66 | 214    | 32.23 |          |       |
| Yuhuan           | 211  | 28.55 | 224    | 33.73 |          |       |
| UIC( $\mu$ g/L)* |      |       |        |       | 4.198    | 0.241 |
| <100             | 122  | 17.35 | 132    | 20.63 |          |       |
| 100-199          | 282  | 40.11 | 226    | 35.31 |          |       |

|  |                            |     |       |     |       |       |       |
|--|----------------------------|-----|-------|-----|-------|-------|-------|
|  | 200-299                    | 171 | 23.14 | 158 | 24.69 |       |       |
|  | ≥300                       | 128 | 17.32 | 124 | 19.38 |       |       |
|  | Iodized salt consumption** |     |       |     |       | 0.015 | 0.901 |
|  | No                         | 250 | 36.39 | 235 | 36.72 |       |       |
|  | Yes                        | 437 | 63.61 | 405 | 63.28 |       |       |

\*60 missing: 36(60.00%) were male and 24(40.00%) were female.

\*\* 76 missing: 52(68.42%) were male and 24(31.58%) were female.

Thyroid nodule(s) were detected in 259 children, accounting for 18.46% of all the participants. Most nodules were accompanied by hypoechogenicity. Of the participants, 5.92% (83/1403) had solitary nodule and 12.54% (176/1403) had multiple thyroid nodules. The frequency of thyroid nodules showed no age or sex related difference (Table 2). The median UIC in children without nodules, with single nodule and multiple nodules were 187.80  $\mu$ g/L, 195.55  $\mu$ g/L, and 160.45  $\mu$ g/L, respectively ( $X^2=7.44$ ,  $P=0.024$ ). The prevalence of multiple thyroid nodules was much higher in children consuming non-iodized salt than those consuming iodized salt.

Table 2. Comparison of the prevalence of thyroid nodules in different subgroups for children from Shanghai, Haimen and Taizhou, China, 2014

| Characteristics                     | No.  | Nodule(s)          |                         | Total      | $\chi^2$ , <i>P</i> -value <sup>#</sup> | $\chi^2$ , <i>P</i> -value <sup>##</sup> |
|-------------------------------------|------|--------------------|-------------------------|------------|-----------------------------------------|------------------------------------------|
|                                     |      | No nodule<br>N (%) | Solitary nodule (N (%)) |            |                                         |                                          |
| All                                 | 1403 | 1144(81.54)        | 83(5.92)                | 176(12.54) | 259(18.46)                              |                                          |
| Sex                                 |      |                    |                         |            |                                         | 3.95, 0.047                              |
| Male                                | 739  | 617(83.49)         | 37(5.01)                | 85(11.50)  | 122(16.51)                              |                                          |
| Female                              | 664  | 527(79.37)         | 46(6.93)                | 91(13.70)  | 137(20.63)                              |                                          |
| Age (years)                         |      |                    |                         |            |                                         | 9.11, 0.028                              |
| 8                                   | 227  | 192(84.58)         | 12(5.29)                | 23(10.13)  | 35(15.42)                               |                                          |
| 9                                   | 461  | 359(77.87)         | 34(7.38)                | 68(14.75)  | 102(22.13)                              |                                          |
| 10                                  | 441  | 374(84.81)         | 24(5.44)                | 43(9.75)   | 67(15.19)                               |                                          |
| 11                                  | 274  | 219(79.93)         | 13(4.74)                | 42(15.33)  | 55(20.07)                               |                                          |
| Iodized salt consumption*           |      |                    |                         |            |                                         | 6.85, 0.009                              |
| No                                  | 485  | 380(78.35)         | 26(5.36)                | 79(16.29)  | 105(21.65)                              |                                          |
| Yes                                 | 842  | 708(84.09)         | 52(6.18)                | 82(9.74)   | 134(15.91)                              |                                          |
| Urinary iodine( $\mu\text{g/l}$ )** |      |                    |                         |            |                                         | 13.00, 0.005                             |
| $\leq 100$                          | 254  | 204(80.31)         | 12(4.72)                | 38(14.96)  | 50(19.69)                               |                                          |
| 100-200                             | 508  | 400(78.74)         | 31(6.10)                | 77(15.16)  | 108(21.26)                              |                                          |
| 200-300                             | 329  | 268(81.46)         | 25(7.60)                | 36(10.94)  | 61(18.54)                               |                                          |
| $> 300$                             | 252  | 225(89.29)         | 12(4.76)                | 15(5.95)   | 27(10.71)                               |                                          |
| Area                                |      |                    |                         |            |                                         | 142.11, <0.001                           |
| Shanghai                            | 520  | 344(66.15)         | 49(9.42)                | 127(24.42) | 176(33.85)                              |                                          |
| Haimen                              | 448  | 426(95.09)         | 20(4.46)                | 2(0.45)    | 22(4.91)                                |                                          |
| Taizhou                             | 435  | 374(85.95)         | 14(3.22)                | 47(10.80)  | 61(14.02)                               |                                          |

\* 76 missing: 52(68.42%) were male and 24(31.58%) were female.

1  
2  
3  
4  
5  
6  
7  
8  
9  
10  
11  
12  
13  
14  
15  
16  
17  
18  
19  
20  
21  
22  
23  
24  
25  
26  
27  
28  
29  
30  
31  
32  
33  
34  
35  
36  
37  
38  
39  
40  
41  
42  
43  
44  
45  
46  
47  
48  
49

\*\* 60 missing: 36(60.00%) were male and 24(40.00%) were female.

# Comparison between participants with/without thyroid nodule(s)

## Comparison among participants without nodule/ with solitary nodule/ with multiple nodules

For peer review only

1  
2  
3  
4 Based on BMI, 255(18.17%) were overweight and 174(12.40%) were obese. Girls  
5  
6 were more likely to be overweight than boys and the prevalence of overweight/obese  
7  
8 decreased with age in both sexes (P-trend: 0.033 for boys and 0.010 for girls). The  
9  
10 prevalences of solitary and multiple nodules in overweight subjects were 3.53%  
11  
12 (9/255) and 15.29% (39/255), while the corresponding prevalence were 20.48%  
13  
14 (17/174) and 14.77% (26/174) in obese ones, respectively.  
15  
16

17  
18 Multivariable analysis revealed significant associations between obesity and the risk  
19  
20 of thyroid nodule(s) (Table 3). As compared with normal weight children, obese  
21  
22 children experienced a significantly higher risks of thyroid nodule(s) (OR: 1.82 (95%  
23  
24 CI: 1.22, 2.70)). We observed a similar association of obesity with the risk of either  
25  
26 solitary nodule or multiple nodules (Table 4). When stratified by sex, only obese girls  
27  
28 experienced an increased risk for multiple nodules (OR: 2.10 (95% CI: 1.03, 4.31))  
29  
30 but the interaction of obesity with sex was not significant (p=0.494). Associations of  
31  
32 multiple nodules with overweight (OR: 1.87, 95% CI: 1.07, 3.29) and obesity (OR:  
33  
34 2.00, 95%CI: 1.05, 3.78) were observed in children aged 8 or 9 years, but not in older  
35  
36 ones. Overweight was not significantly associated with solitary thyroid nodule in  
37  
38 general, which might be due to small number of children with this thyroid condition.  
39  
40 Overweight children had an increased risk for multiple thyroid nodules (OR: 1.76, 95%  
41  
42 CI: 1.03, 3.02) only in iodized salt consumers.  
43  
44  
45  
46  
47  
48  
49  
50  
51  
52  
53  
54  
55  
56  
57  
58  
59  
60

1  
2  
3  
4  
5  
6  
7  
8  
9  
10  
11  
12  
13  
14  
15  
16  
17  
18  
19  
20  
21  
22  
23  
24  
25  
26  
27  
28  
29  
30  
31  
32  
33  
34  
35  
36  
37  
38  
39  
40  
41  
42  
43  
44  
45  
46  
47  
48  
49

Table 3 Multinomial logistic regression analysis of obesity and thyroid nodule(s) for children from Shanghai, Haimen and Taizhou, China, 2014

|                                        |         | No nodule | Thyroid Nodule(s) |            |         |                         |    |                         |
|----------------------------------------|---------|-----------|-------------------|------------|---------|-------------------------|----|-------------------------|
|                                        |         |           | Normal            | Overweight | Obesity |                         |    |                         |
|                                        |         | N         | N                 | OR         | N       | OR (95%CI) <sup>a</sup> | N  | OR (95%CI) <sup>a</sup> |
| All subjects*                          |         | 1144      | 168               |            | 48      |                         | 43 |                         |
|                                        | Model 1 |           |                   | 1.00       |         | 1.11(0.78, 1.59)        |    | 1.58(1.07, 2.31)        |
|                                        | Model 2 |           |                   | 1.00       |         | 1.00(0.69, 1.45)        |    | 1.82(1.22, 2.70)        |
|                                        | Model 3 |           |                   | 1.00       |         | 1.04(0.71, 1.51)        |    | 1.71(1.13, 2.59)        |
| Sex**                                  | Male    | 576       | 80                | 1.00       | 14      | 0.83(0.45, 1.54)        | 17 | 1.39(0.77, 2.52)        |
|                                        | Female  | 512       | 79                | 1.00       | 29      | 1.21(0.75, 1.96)        | 20 | 2.10(1.17, 3.79)        |
| Age (years) <sup>#</sup>               | 8-9     | 519       | 76                | 1.00       | 27      | 1.37(0.83, 2.25)        | 25 | 1.87(1.10, 3.19)        |
|                                        | 10-11   | 569       | 83                | 1.00       | 16      | 0.77(0.43, 1.38)        | 12 | 1.39(0.70, 2.75)        |
| Iodized salt consumption <sup>##</sup> | Yes     | 708       | 81                | 1.00       | 28      | 1.20(0.75, 1.93)        | 25 | 1.62(0.98, 2.68)        |
|                                        | No      | 380       | 78                | 1.00       | 15      | 0.81(0.43, 1.50)        | 12 | 1.94(0.92, 4.09)        |

\* Model 1: univariate analysis (N=1403)  
 Model 2: adjustment for sex, age, iodized salt consumption (N=1327)  
 Model 3: adjustment for sex, age, urinary iodine concentration (N=1343)  
 \*\* Adjustment for age and iodized salt consumption (N=1327)  
 # Adjustment for sex and iodized salt consumption (N=1327)  
 ## Adjustment for sex, and age (N=1327)



Table 4. Multinomial logistic regression analysis of obesity and solitary and multiple thyroid nodules for children from Shanghai, Haimen and Taizhou, China, 2014

|                             |         | Normal    |    |                 |      | Overweight       |      |                  |                         | Obesity          |                         |                  |                         |                  |                         |
|-----------------------------|---------|-----------|----|-----------------|------|------------------|------|------------------|-------------------------|------------------|-------------------------|------------------|-------------------------|------------------|-------------------------|
|                             |         | No nodule |    | Solitary nodule |      | Multiple nodules |      | Solitary nodule  |                         | Multiple nodules |                         | Solitary nodule  |                         | Multiple nodules |                         |
|                             |         | N         | OR | N               | OR   | N                | OR   | N                | OR (95%CI) <sup>a</sup> |
| All subjects*               |         | 1144      |    | 57              |      | 111              |      | 9                |                         | 39               |                         | 17               |                         | 26               |                         |
|                             | Model 1 |           |    | 1.00            |      | 1.00             |      | 0.62(0.30, 1.26) |                         | 1.37(0.92, 2.03) |                         | 1.84(1.04, 3.25) |                         | 1.44(0.91, 2.30) |                         |
|                             | Model 2 |           |    | 1.00            |      | 1.00             |      | 0.53(0.25, 1.13) |                         | 1.33(0.88, 2.03) |                         | 1.82(0.99, 3.36) |                         | 1.62(0.98, 2.70) |                         |
|                             | Model 3 |           |    | 1.00            |      | 1.00             |      | 0.54(0.25, 1.16) |                         | 1.24(0.82, 1.88) |                         | 2.07(1.16, 3.71) |                         | 1.67(1.03, 2.70) |                         |
| Sex**                       | Male    | 576       |    | 26              | 1.00 | 54               | 1.00 | 1                | 0.17(0.02, 1.28)        | 13               | 1.18(0.61, 2.26)        | 7                | 1.53(0.63, 3.71)        | 10               | 1.29(0.62, 2.70)        |
|                             | Female  | 512       |    | 29              | 1.00 | 50               | 1.00 | 7                | 0.77(0.33, 1.82)        | 22               | 1.49(0.86, 2.59)        | 8                | 2.09(0.89, 4.89)        | 12               | 2.10(1.03, 4.31)        |
| Age (years)#                | 8-9     | 519       |    | 29              | 1.00 | 47               | 1.00 | 5                | 0.63(0.24, 1.68)        | 22               | 1.87(1.07, 3.29)        | 9                | 1.60(0.71, 3.57)        | 16               | 2.00(1.05, 3.78)        |
|                             | 10-11   | 569       |    | 26              | 1.00 | 57               | 1.00 | 3                | 0.46(0.14, 1.55)        | 13               | 0.95(0.50, 1.82)        | 6                | 2.05(0.80, 5.25)        | 6                | 1.05(0.43, 2.60)        |
| Iodized salt consumption### | Yes     | 708       |    | 35              | 1.00 | 46               | 1.00 | 5                | 0.48(0.18, 1.27)        | 23               | 1.76(1.03, 3.02)        | 12               | 1.76(0.88, 3.54)        | 13               | 1.50(0.78, 2.90)        |
|                             | No      | 380       |    | 20              | 1.00 | 58               | 1.00 | 3                | 0.59(0.17, 2.08)        | 12               | 0.88(0.45, 1.75)        | 3                | 1.84(0.50, 6.79)        | 9                | 1.97(0.86, 4.48)        |

\* Model 1: univariate analysis (N=1403)

Model 2: adjustment for sex, age, iodized salt consumption (N=1327)

Model 3: adjustment for sex, age, urinary iodine concentration (N=1343)

\*\* Adjustment for age and iodized salt consumption (N=1327)

# Adjustment for sex and iodized salt consumption (N=1327)

## Adjustment for sex, and age (N=1327)

1  
2  
3  
4 Figures 2 presents multivariate-adjusted ORs and 95% confidence intervals for  
5  
6 solitary and multiple thyroid nodules associated with the quintiles of BSA, WC, BMI,  
7  
8 and WHR, respectively. After adjustment for sex, age, and iodized salt consumption  
9  
10 status, BSA and WC were positively related to the risks of solitary and multiple  
11  
12 nodule(s) (p values for trend for all the nodules together were 0.0001 and <0.0001,  
13  
14 respectively). As compared with children in the lowest quintile, the ORs of solitary  
15  
16 and multiple nodules were 2.45 (95% CI: 1.24, 4.87) and 2.76 (95% CI: 1.54, 4.97)  
17  
18 for those in the highest quintile of BSA and 3.46 (95% CI: 1.54, 7.80) and 2.18 (95%  
19  
20 CI: 1.27, 3.74) for those in the highest quintile of WC, respectively. The interaction  
21  
22 between BSA and sex on thyroid nodules was not statistically significant  
23  
24 (p-interaction: 0.785 for solitary nodule and 0.600 for multiple nodules).  
25  
26  
27  
28  
29

30  
31 The results for BMI and WHR were less consistent. BMI was positively associated  
32  
33 with the risk of multiple nodules (p-trend=0.005), while WHR showed no association  
34  
35 with either solitary or multiple nodules.  
36  
37  
38  
39  
40

## 41 **DISCUSSION**

42  
43 In this large cross-sectional study of children living in iodine sufficient areas in East  
44  
45 China, we observed a high prevalence of thyroid nodules and positive associations of  
46  
47 obesity with both solitary and multiple thyroid nodules. Among several  
48  
49 anthropometric measurements, BSA and WC were related to the risks for both solitary  
50  
51 and multiple thyroid nodules. These findings were generally consistent across sex  
52  
53 and multiple thyroid nodules. These findings were generally consistent across sex  
54  
55 groups and independent of iodized salt consumption status.  
56  
57  
58  
59  
60

1  
2  
3  
4 Thyroid nodule(s) is common in adults and its impact on thyroid cancer risk is still  
5  
6 unclear<sup>16</sup>. The prevalence of incidental thyroid nodules detected by ultrasound  
7  
8 examinations is high in adults (close to 50%) as well as in iodine-deficient countries<sup>3-5</sup>.  
9  
10  
11 However, few studies have investigated the prevalence, and the spectrum of  
12  
13 appearance of ultrasound-detected findings in children. Thyroid nodules were  
14  
15 identified in 1.65% of children aged 3 to 18 years in three Japanese prefectures, and  
16  
17 the prevalence increased with age with a female predominance<sup>32</sup>. The information  
18  
19 released by Fukushima Prefecture indicated that 2014 (1.15%) of 75216 Japanese  
20  
21 children aged 0-18 had thyroid nodules<sup>33</sup>. Avula et al. conducted a retrospective  
22  
23 analysis in 287 Canadian children (mean age=6.2) and detected only 1 child with  
24  
25 multiple thyroid nodules but 52(18%) children with thyroid abnormalities<sup>34</sup>. In  
26  
27 healthy Greek children living in an iodine-replete area, one or more nodules were  
28  
29 observed in 5.1% of them<sup>35</sup>. For 2410 children aged 6-17 years living in Hangzhou,  
30  
31 China, thyroid nodules were detected in 10.66% of them<sup>36</sup>. These results showed  
32  
33 much lower frequencies than those observed in the current study, in which thyroid  
34  
35 nodules existed in 18.46% of 1433 Chinese children with little age- and sex-variations.  
36  
37 Influencing factors include age composition, inter-observer variation, iodine intake,  
38  
39 socio-economic status and individual and/or family history, as well as detection  
40  
41 sensitivity and image quality of ultrasound machine<sup>32</sup>.  
42  
43  
44  
45  
46  
47  
48  
49  
50  
51  
52  
53  
54  
55  
56  
57  
58  
59  
60  
61  
62  
63  
64  
65  
66  
67  
68  
69  
70  
71  
72  
73  
74  
75  
76  
77  
78  
79  
80  
81  
82  
83  
84  
85  
86  
87  
88  
89  
90  
91  
92  
93  
94  
95  
96  
97  
98  
99  
100  
101  
102  
103  
104  
105  
106  
107  
108  
109  
110  
111  
112  
113  
114  
115  
116  
117  
118  
119  
120  
121  
122  
123  
124  
125  
126  
127  
128  
129  
130  
131  
132  
133  
134  
135  
136  
137  
138  
139  
140  
141  
142  
143  
144  
145  
146  
147  
148  
149  
150  
151  
152  
153  
154  
155  
156  
157  
158  
159  
160  
161  
162  
163  
164  
165  
166  
167  
168  
169  
170  
171  
172  
173  
174  
175  
176  
177  
178  
179  
180  
181  
182  
183  
184  
185  
186  
187  
188  
189  
190  
191  
192  
193  
194  
195  
196  
197  
198  
199  
200  
201  
202  
203  
204  
205  
206  
207  
208  
209  
210  
211  
212  
213  
214  
215  
216  
217  
218  
219  
220  
221  
222  
223  
224  
225  
226  
227  
228  
229  
230  
231  
232  
233  
234  
235  
236  
237  
238  
239  
240  
241  
242  
243  
244  
245  
246  
247  
248  
249  
250  
251  
252  
253  
254  
255  
256  
257  
258  
259  
260  
261  
262  
263  
264  
265  
266  
267  
268  
269  
270  
271  
272  
273  
274  
275  
276  
277  
278  
279  
280  
281  
282  
283  
284  
285  
286  
287  
288  
289  
290  
291  
292  
293  
294  
295  
296  
297  
298  
299  
300  
301  
302  
303  
304  
305  
306  
307  
308  
309  
310  
311  
312  
313  
314  
315  
316  
317  
318  
319  
320  
321  
322  
323  
324  
325  
326  
327  
328  
329  
330  
331  
332  
333  
334  
335  
336  
337  
338  
339  
340  
341  
342  
343  
344  
345  
346  
347  
348  
349  
350  
351  
352  
353  
354  
355  
356  
357  
358  
359  
360  
361  
362  
363  
364  
365  
366  
367  
368  
369  
370  
371  
372  
373  
374  
375  
376  
377  
378  
379  
380  
381  
382  
383  
384  
385  
386  
387  
388  
389  
390  
391  
392  
393  
394  
395  
396  
397  
398  
399  
400  
401  
402  
403  
404  
405  
406  
407  
408  
409  
410  
411  
412  
413  
414  
415  
416  
417  
418  
419  
420  
421  
422  
423  
424  
425  
426  
427  
428  
429  
430  
431  
432  
433  
434  
435  
436  
437  
438  
439  
440  
441  
442  
443  
444  
445  
446  
447  
448  
449  
450  
451  
452  
453  
454  
455  
456  
457  
458  
459  
460  
461  
462  
463  
464  
465  
466  
467  
468  
469  
470  
471  
472  
473  
474  
475  
476  
477  
478  
479  
480  
481  
482  
483  
484  
485  
486  
487  
488  
489  
490  
491  
492  
493  
494  
495  
496  
497  
498  
499  
500  
501  
502  
503  
504  
505  
506  
507  
508  
509  
510  
511  
512  
513  
514  
515  
516  
517  
518  
519  
520  
521  
522  
523  
524  
525  
526  
527  
528  
529  
530  
531  
532  
533  
534  
535  
536  
537  
538  
539  
540  
541  
542  
543  
544  
545  
546  
547  
548  
549  
550  
551  
552  
553  
554  
555  
556  
557  
558  
559  
560  
561  
562  
563  
564  
565  
566  
567  
568  
569  
570  
571  
572  
573  
574  
575  
576  
577  
578  
579  
580  
581  
582  
583  
584  
585  
586  
587  
588  
589  
590  
591  
592  
593  
594  
595  
596  
597  
598  
599  
600  
601  
602  
603  
604  
605  
606  
607  
608  
609  
610  
611  
612  
613  
614  
615  
616  
617  
618  
619  
620  
621  
622  
623  
624  
625  
626  
627  
628  
629  
630  
631  
632  
633  
634  
635  
636  
637  
638  
639  
640  
641  
642  
643  
644  
645  
646  
647  
648  
649  
650  
651  
652  
653  
654  
655  
656  
657  
658  
659  
660  
661  
662  
663  
664  
665  
666  
667  
668  
669  
670  
671  
672  
673  
674  
675  
676  
677  
678  
679  
680  
681  
682  
683  
684  
685  
686  
687  
688  
689  
690  
691  
692  
693  
694  
695  
696  
697  
698  
699  
700  
701  
702  
703  
704  
705  
706  
707  
708  
709  
710  
711  
712  
713  
714  
715  
716  
717  
718  
719  
720  
721  
722  
723  
724  
725  
726  
727  
728  
729  
730  
731  
732  
733  
734  
735  
736  
737  
738  
739  
740  
741  
742  
743  
744  
745  
746  
747  
748  
749  
750  
751  
752  
753  
754  
755  
756  
757  
758  
759  
760  
761  
762  
763  
764  
765  
766  
767  
768  
769  
770  
771  
772  
773  
774  
775  
776  
777  
778  
779  
780  
781  
782  
783  
784  
785  
786  
787  
788  
789  
790  
791  
792  
793  
794  
795  
796  
797  
798  
799  
800  
801  
802  
803  
804  
805  
806  
807  
808  
809  
810  
811  
812  
813  
814  
815  
816  
817  
818  
819  
820  
821  
822  
823  
824  
825  
826  
827  
828  
829  
830  
831  
832  
833  
834  
835  
836  
837  
838  
839  
840  
841  
842  
843  
844  
845  
846  
847  
848  
849  
850  
851  
852  
853  
854  
855  
856  
857  
858  
859  
860  
861  
862  
863  
864  
865  
866  
867  
868  
869  
870  
871  
872  
873  
874  
875  
876  
877  
878  
879  
880  
881  
882  
883  
884  
885  
886  
887  
888  
889  
890  
891  
892  
893  
894  
895  
896  
897  
898  
899  
900  
901  
902  
903  
904  
905  
906  
907  
908  
909  
910  
911  
912  
913  
914  
915  
916  
917  
918  
919  
920  
921  
922  
923  
924  
925  
926  
927  
928  
929  
930  
931  
932  
933  
934  
935  
936  
937  
938  
939  
940  
941  
942  
943  
944  
945  
946  
947  
948  
949  
950  
951  
952  
953  
954  
955  
956  
957  
958  
959  
960  
961  
962  
963  
964  
965  
966  
967  
968  
969  
970  
971  
972  
973  
974  
975  
976  
977  
978  
979  
980  
981  
982  
983  
984  
985  
986  
987  
988  
989  
990  
991  
992  
993  
994  
995  
996  
997  
998  
999  
1000

1  
2  
3 adults with inconsistent results<sup>37-38</sup>.

4  
5  
6 Obesity is a risk factor for several chronic conditions, as well as goiter in adults<sup>39</sup>. Its  
7  
8 impact on thyroid nodules has also been investigated by using different  
9  
10 anthropometric parameters in adults. Among various parameters, BMI was most  
11  
12 frequently used as a measure of general adiposity. It has been increasingly recognized  
13  
14 that the adverse effects of obesity relate not only to the amount but also to the  
15  
16 distribution of excess body fat. Therefore, the use of BMI alone to infer health risks in  
17  
18 Asians may underestimate the detrimental health effects of excess adiposity<sup>40</sup>. WHR  
19  
20 and WC were good proxy measures of central adiposity. It has been suggested that  
21  
22 WC is a better marker for total body adiposity than it is for visceral fat<sup>41</sup>. Another  
23  
24 study has shown that both WC and BMI appear to perform equally well for estimating  
25  
26 children and adolescents's total adiposity<sup>42</sup>. BSA is a better indicator of the circulating  
27  
28 blood volume, oxygen consumption, and basal energy expenditure than BMI<sup>37</sup> and  
29  
30 has been shown to be the best independent predictor of the thyroid volume in both  
31  
32 sexes.  
33  
34  
35  
36  
37  
38  
39

40  
41 Several studies have found significant associations between measures of obesity and  
42  
43 the risk of thyroid nodules. For example, a study conducted in Hangzhou, China  
44  
45 observed a prevalence of TN being 34.97% (33.97 for men and 36.92% for women)  
46  
47 and great WC as a risk factor for new TN in this iodine-adequate area<sup>2</sup>. Similar trends  
48  
49 were observed for females and males, but the association was not statistically  
50  
51 significant in men<sup>2</sup>, which was similar to our findings in children. Another study of  
52  
53 postmenopausal women also revealed that WC and BMI were associated with thyroid  
54  
55  
56  
57  
58  
59  
60

1  
2  
3  
4 nodules<sup>43</sup>. Large BMI was associated with nodule growth among older patients with  
5  
6 multiple nodules and larger dominant nodules<sup>17</sup>. Study conducted by Shin et al linked  
7  
8 thyroid nodular disease to WC for males and glycated hemoglobin for females<sup>44</sup>,  
9  
10 suggesting potential sex disparity. The presence of insulin resistance (IR) was  
11  
12 associated with larger thyroid gland volume and an increased prevalence of thyroid  
13  
14 nodules<sup>45-46</sup>, which might be explained by obesity-related subclinical inflammation  
15  
16 and an associated increase in levels of insulin-like growth factor-1(IGF-1)<sup>45</sup>. However,  
17  
18 another study yielded conflicting results, which suggested that adult patients with  
19  
20 normal weight or overweight based on BMI tended to have an increased risk of  
21  
22 thyroid nodules, as compared with underweight or obese people<sup>38</sup>. Evidence in  
23  
24 children had been relatively limited.  
25  
26  
27  
28  
29

30  
31 The prevalence of obesity and overweight in our study population was slightly higher  
32  
33 than that in students from four Chinese megacities (25.6%)<sup>47</sup> but lower than urban  
34  
35 students of similar age groups in the National Surveys on Chinese Students'  
36  
37 Constitution and Health (37.0% for overweight and 20.3% for obesity)<sup>48</sup>. Our findings  
38  
39 of increased risk for thyroid nodules in obese children are generally consistent with  
40  
41 those in obese adults of other studies. The association of BSA with thyroid volume in  
42  
43 children has been well established<sup>35</sup>, while its relation to thyroid nodules has been  
44  
45 seldom explored. Kim et al.<sup>38</sup> examined 7763 healthy Korean adults and observed a  
46  
47 significantly smaller BSA in those with thyroid nodules compared to the others,  
48  
49 which was opposite to our findings. Considering the great difference in BSA between  
50  
51 adults and children, it need to be cautious to generalize the results to children<sup>16</sup>. Xu  
52  
53  
54  
55  
56  
57  
58  
59  
60

1  
2  
3 et.al<sup>36</sup> conducted a cross-sectional study in Hangzhou, China, and reported an OR of  
4  
5  
6 2.97 (95% CI: 1.85 to 4.77) for thyroid nodules for children with average BSA or  
7  
8 above as compared with those with less than average BSA. However, they did not  
9  
10 collect the information on waist and hip circumferences and number of thyroid  
11  
12 nodules. Therefore, it was not possible to determine different associations between  
13  
14 WC, WHR and different kinds of nodules in that study. The potential interactive  
15  
16 effects of iodized salt consumption, and sex on the association between overweight  
17  
18 and multiple nodules also needs further investigations with a larger sample size.  
19  
20  
21 The strengths of our study include large sample size, directly measured thyroid  
22  
23 ultrasonography and anthropometric measurements following a standardized protocol,  
24  
25 and the abilities to distinguish solitary and multiple nodules and to adjust for  
26  
27 household iodized salt consumption status. Our study has several limitations. Firstly,  
28  
29 we did not have any information on thyroid function. Therefore, we were unable to  
30  
31 further search potential mechanisms that might explain the observed associations.  
32  
33 Secondly, there were no information on the amount of salt, and milk consumption. In  
34  
35 the current study, the number of children with solitary or multiple nodules was small  
36  
37 in some categories. In addition, the cross-sectional design prevents us from making  
38  
39 causal inferences.  
40  
41  
42  
43  
44  
45  
46  
47

## 48 49 **CONCLUSION**

50  
51 In this cross-sectional study of a relatively lean children population, we found that  
52  
53 elevated levels of general or abdominal adiposity, measured by BMI, BSA and WC,  
54  
55 were associated with a significant increase in the risk of thyroid nodule(s), especially  
56  
57  
58  
59  
60

1  
2  
3  
4 multiple nodules in girls and solitary nodule in boys. Our findings, along with those  
5  
6 observed from adult populations, emphasize the importance of preventing excess  
7  
8 adiposity for primary prevention of thyroid nodules.  
9

10  
11  
12  
13 **Contributors** NW, HF, CWF, PXH, MFS, QZ, and QWJ contributed to the study  
14  
15 design; NW, HF, CWF, PXH, MFS, FJ, QZ and QWJ contributed to data acquisition  
16  
17 and collection; NW, QZ, YC contributed to data analysis and interpretation; NW, QZ  
18  
19 and YC drafted the manuscript; all authors contributed to the preparation of the final  
20  
21 document, read and approved the final manuscript.  
22  
23

24  
25  
26 **Funding** This work was supported by the Chinese National Natural Science  
27  
28 Foundation (No. 81602806), Shanghai Municipal Commission of Health and Family  
29  
30 Planning (No. 20144Y0104), and Shanghai Key Discipline Construction Project of  
31  
32 Shanghai Municipal Public Health (No. 15GWZK0801).  
33  
34

35  
36 **Competing interests** None declared.  
37

38  
39 **Ethics approval** The study was approved by the Ethical Review Board of the  
40  
41 School of Public Health of Fudan University (#2012-03-0350S).  
42  
43

44 **Provenance and peer review** Not commissioned; externally peer reviewed.  
45

46 **Data sharing statement** No additional data are available.  
47

48  
49 **Open Access** This is an Open Access article distributed in accordance with the  
50  
51 Creative Commons Attribution Non Commercial (CC BY-NC 4.0) license, which  
52  
53 permits others to distribute, remix, adapt, build upon this work noncommercially, and  
54  
55 license their derivative works on different terms, provided the original work is  
56  
57  
58  
59  
60

1  
2  
3  
4  
5  
6  
7  
8  
9  
10  
11  
12  
13  
14  
15  
16  
17  
18  
19  
20  
21  
22  
23  
24  
25  
26  
27  
28  
29  
30  
31  
32  
33  
34  
35  
36  
37  
38  
39  
40  
41  
42  
43  
44  
45  
46  
47  
48  
49  
50  
51  
52  
53  
54  
55  
56  
57  
58  
59  
60

properly cited and the use is non-commercial. See: <http://creativecommons.org/licenses/by-nc/4.0/>

For peer review only



## REFERENCES

1. Aydin Y, Besir FH, Erkan ME, et al. Spectrum and prevalence of nodular thyroid diseases detected by ultrasonography in the Western Black Sea region of Turkey. *Medical Ultrasonography* 2014;16(2):100-06.
2. Yin J, Wang C, Shao Q, et al. Relationship between the Prevalence of Thyroid Nodules and Metabolic Syndrome in the Iodine-Adequate Area of Hangzhou, China: A Cross-Sectional and Cohort Study. *Int J Endocrinol* 2014;2014:675796.
3. Carle A, Krejbjerg A, Laurberg P. Epidemiology of nodular goitre. Influence of iodine intake. *Best Pract Res Clin Endoc Metab* 2014;28(4):465-79.
4. Ajmal S, Rapoport S, Battle HR, et al. The Natural History of the Benign Thyroid Nodule: What Is the Appropriate Follow-Up Strategy? *Journal of the American College of Surgeons* 2015;220(6):987-92.
5. Guo HW, Sun M, He W, et al. The prevalence of thyroid nodules and its relationship with metabolic parameters in a Chinese community-based population aged over 40 years. *Endocrine* 2014;45(2):230-35.
6. Luo J, McManus C, Chen H, et al. Are There Predictors of Malignancy in Patients with Multinodular Goiter? *J Surg Res* 2012;174(2):207-10.
7. Akushevich I, Kravchenko J, Ukrainseva S, et al. Time trends of incidence of age-associated diseases in the US elderly population: medicare-based analysis. *Age Ageing* 2013;42(4):494-500.
8. Huan Q, Wang K, Lou FC, et al. Epidemiological characteristics of thyroid nodules and risk factors for malignant nodules: a retrospective study from 6 304 surgical cases. *Chin Med J* 2014;127(12):2286-92.
9. Shin J, Kim MH, Yoon KH, et al. Relationship between metabolic syndrome and thyroid nodules in healthy Koreans. *Korean J Intern Med* 2016;31(1):98-105.
10. Teng WP, Shan ZY, Teng XC, et al. Effect of iodine intake on thyroid diseases in China. *New Engl J Med* 2006;354(26):2783-93.
11. Guignard R, Truong T, Rougier Y, et al. Alcohol drinking, tobacco smoking, and anthropometric characteristics as risk factors for thyroid cancer: A countrywide case-control study in New Caledonia. *Am J Epidemiol* 2007;166(10):1140-49.
12. Leitzmann MF, Brenner A, Moore SC, et al. Prospective study of body mass index, physical activity and thyroid cancer. *Int J Cancer* 2010;126(12):2947-56.
13. Samanic C, Chow WH, Gridley G, et al. Relation of body mass index to cancer risk in 362,552 Swedish men. *Cancer Causes Control* 2006;17(7):901-9.
14. Rapp K, Schroeder J, Klenk J, et al. Obesity and incidence of cancer: a large cohort study of over 145,000 adults in Austria. *Br J Cancer* 2005;93(9):1062-7.

15. Han JM, Kim TY, Jeon MJ, et al. Obesity is a risk factor for thyroid cancer in a large, ultrasonographically screened population. *Eur J Endocrinol* 2013;168(6):879-86.
16. Niedziela M. Thyroid nodules. *Best Pract Res Clin Endoc Metab* 2014;28(2):245-77.
17. Durante C, Costante G, Lucisano G, et al. The Natural History of Benign Thyroid Nodules. *JAMA-J Am Med Assoc* 2015;313(9):926-35.
18. LaFranchi SH. Inaugural Management Guidelines for Children with Thyroid Nodules and Differentiated Thyroid Cancer: Children Are Not Small Adults. *Thyroid* 2015;25(7):713-5.
19. Wang N, Zhou Y, Fu C, et al. Influence of Bisphenol A on Thyroid Volume and Structure Independent of Iodine in School Children. *PLoS One* 2015;10(10):e0141248.
20. Peixin H, Feng J, Xin F, et al. A cross-sectional study of urinary iodine and salt iodine content among schoolchildren and their families in Haimen City, Jiangsu Province. *Chinese Journal of Endemiology* 2014;6(33):654-56.
21. Liu Pu, Fang Hong, Wang Na, et al. Investigation on urinary and salt iodine levels of school-aged children in Minhang District of Shanghai. *Fudan University Journal of Medical Sciences* 2014;41(2):179-82.
22. Su Meifang, Wang Congyun, Li Songtao, et al. A cross-sectional study on urinary iodine and iodine content of salt among school children aged 8-10 years old in Yuhuan County, Zhejiang Province in 2012. *Journal of Hygiene Research* 2013;42(6):893-96.
23. Li H, Zong XN, Ji CY, et al. Body mass index cut-offs for overweight and obesity in Chinese children and adolescents aged 2 - 18 years. *Chin J Epidemiol* 2010;31(6):616-20.
24. Mosteller RD. Simplified Calculation of Body-Surface Area. *New Engl J Med* 1987;317(17):1098-98.
25. Fuse Y, Saito N, Tsuchiya T, et al. Smaller thyroid gland volume with high urinary iodine excretion in Japanese schoolchildren: normative reference values in an iodine-sufficient area and comparison with the WHO/ICCIDD reference. *Thyroid* 2007;17(2):145-55.
26. Cooper DS, Doherty GM, Haugen BR, et al. Revised American Thyroid Association management guidelines for patients with thyroid nodules and differentiated thyroid cancer. *Thyroid* 2009;19(11):1167-214.
27. National Committee of standards for endemic and parasites, Ministry of Health of Peoples republic of China. WS/T107-2006 Method for measuring iodine in urine by As<sup>3+</sup>-Ce<sup>4+</sup> catalytic spectrophotometry. Beijing: China Standard Press, 2006.
28. Tong YK HC, Li BQ, Li MH, Zhang NJ, Min SH, Fu SY General test method in

- 1  
2  
3 salt industry: determination of iodide ion (GB/T 13025.7-1999). Beijing,China:  
4 China Criteria Publishing House, 1999:1-5.  
5  
6 29. Ministry of Health of Peoples republic of China. GB160062-2008 Iodine  
7 Deficiency Disease elimination standard. Beijing, China: China Standard Press  
8 2008.  
9  
10 30. Zimmermann MB, Andersson M. Assessment of iodine nutrition in populations:  
11 past, present, and future. *Nutrition Reviews* 2012;70(10):553-70.  
12  
13 31. Jooste PL, Strydom E. Methods for determination of iodine in urine and salt. *Best*  
14 *Pract Res Clin Endocrinol Metab* 2010;24(1):77-88.  
15  
16 32. Hayashida N, Imaizumi M, Shimura H, et al. Thyroid Ultrasound Findings in  
17 Children from Three Japanese Prefectures: Aomori, Yamanashi and Nagasaki.  
18 *PLoS One* 2013;8(12) doi: e8322010.1371  
19  
20 33. Yasumura S, Hosoya M, Yamashita S, et al. Study protocol for the Fukushima  
21 Health Management Survey. *J Epidemiol* 2012;22(5):375-83.  
22  
23 34. Avula S, Daneman A, Navarro OM, et al. Incidental thyroid abnormalities  
24 identified on neck US for non-thyroid disorders. *Pediatr Radiol*  
25 2010;40(11):1774-80.  
26  
27 35. Kaloumenou I, Alevizaki M, Ladopoulos C, et al. Thyroid volume and  
28 echostructure in schoolchildren living in an iodine-replete area: relation to age,  
29 pubertal stage, and body mass index. *Thyroid* 2007;17(9):875-81.  
30  
31 36. Xu W, Chen Z, Li N, et al. Relationship of anthropometric measurements to  
32 thyroid nodules in a Chinese population. *BMJ Open* 2015;5(12):e008452.  
33  
34 37. Clero E, Leux C, Brindel P, et al. Pooled analysis of two case-control studies in  
35 New Caledonia and French Polynesia of body mass index and differentiated  
36 thyroid cancer: the importance of body surface area. *Thyroid*  
37 2010;20(11):1285-93.  
38  
39 38. Kim JY, Jung EJ, Park ST, et al. Body size and thyroid nodules in healthy Korean  
40 population. *J Korean Surg Soc* 2012;82(1):13-7.  
41  
42 39. Kocak M, Erem C, Deger O, et al. Current prevalence of goiter determined by  
43 ultrasonography and associated risk factors in a formerly iodine-deficient area of  
44 Turkey. *Endocrine* 2014;47(1):290-98.  
45  
46 40. WHO expert consultation. Appropriate body-mass index in Asian populations and  
47 its implications for policy and intervention strategies. *Lancet*  
48 2004;363(9412):902-02.  
49  
50 41. Sardinha LB, Santos DA, Silva AM, et al. A Comparison between BMI, Waist  
51 Circumference, and Waist-To-Height Ratio for Identifying Cardio-Metabolic Risk  
52 in Children and Adolescents. *PLoS One* 2016;11(2):e0149351.  
53  
54 42. Katzmarzyk PT, Bouchard C. Where is the beef? Waist circumference is more  
55 highly correlated with BMI and total body fat than with abdominal visceral fat in  
56  
57  
58  
59  
60

- 1  
2  
3 children. *Int J Obes (Lond)* 2014;38(6):753-4.
- 4 43. Zheng L, Yan WH, Kong Y, et al. An epidemiological study of risk factors of  
5 thyroid nodule and goiter in Chinese women. *International Journal of Clinical*  
6 *and Experimental Medicine* 2015;8(7):11379-87.
- 7  
8 44. Shin J, Kim MH, Yoon KH, et al. Relationship between metabolic syndrome and  
9 thyroid nodules in healthy Koreans. *Korean Journal of Internal Medicine*  
10 2016;31(1):98-U211.
- 11  
12 45. Balkan F, Onal ED, Usluogullari A, et al. "Is there any association between insulin  
13 resistance and thyroid cancer? : a case control study". *Endocrine*  
14 2014;45(1):55-60.
- 15  
16 46. Ayturk S, GURSOY A, Kut A, et al. Metabolic syndrome and its components are  
17 associated with increased thyroid volume and nodule prevalence in a  
18 mild-to-moderate iodine-deficient area. *Eur J Endocrinol* 2009;161(4):599-605.
- 19  
20 47. Jia P, Li M, Xue H, et al. School environment and policies, child eating behavior  
21 and overweight/obesity in urban China: the childhood obesity study in China  
22 megacities. *Int J Obes (Lond)* 2017;41(5):813-19.
- 23  
24 48. Zhou Y, Wang S, Zhang Q, et al. Prevalence of overweight and obesity among  
25 children and adolescents increased rapidly in Chinese rural regions while level off  
26 in urban areas. *Int J Cardiol* 2016;223:61-62.
- 27  
28  
29  
30  
31  
32  
33  
34  
35  
36  
37  
38  
39  
40  
41  
42  
43  
44  
45  
46  
47  
48  
49  
50  
51  
52  
53  
54  
55  
56  
57  
58  
59  
60

1  
2  
3  
4  
5  
6  
7  
8  
9  
10  
11  
12  
13  
14  
15  
16  
17  
18  
19  
20  
21  
22  
23  
24  
25  
26  
27  
28  
29  
30  
31  
32  
33  
34  
35  
36  
37  
38  
39  
40  
41  
42  
43  
44  
45  
46  
47  
48  
49  
50  
51  
52  
53  
54  
55  
56  
57  
58  
59  
60

Figure 1. Flow chart for the study design

Figure 2. Associations of Different Physical Measurements (BSA, WC, BMI, and WHR) with Thyroid Nodule(s) for children from Shanghai, Haimen and Taizhou, China, 2014

For peer review only

1  
2  
3  
4  
5  
6  
7  
8  
9  
10  
11  
12  
13  
14  
15  
16  
17  
18  
19  
20  
21  
22  
23  
24  
25  
26  
27  
28  
29  
30  
31  
32  
33  
34  
35  
36  
37  
38  
39  
40  
41  
42  
43  
44  
45  
46  
47  
48  
49  
50  
51  
52  
53  
54  
55  
56  
57  
58  
59  
60

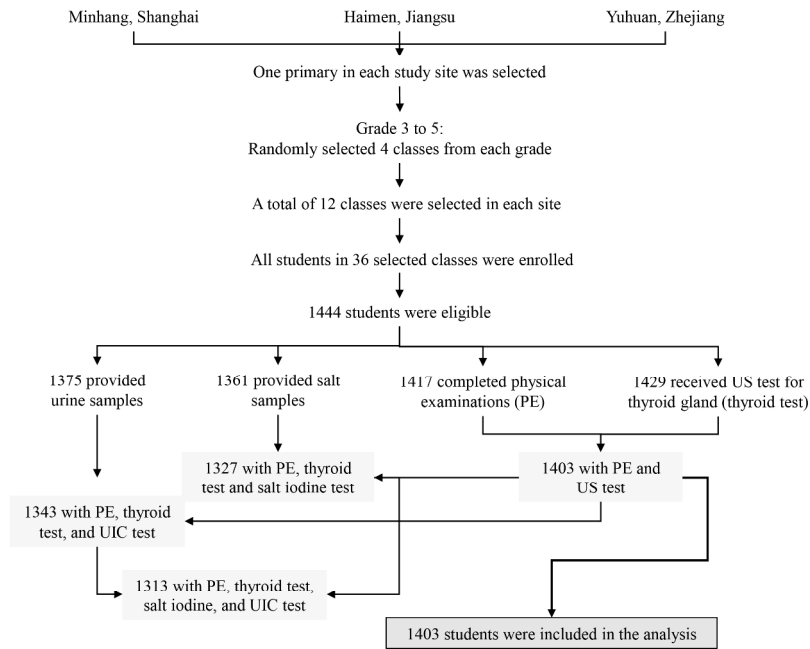

flow chart

254x190mm (300 x 300 DPI)

ew only

1  
2  
3  
4  
5  
6  
7  
8  
9  
10  
11  
12  
13  
14  
15  
16  
17  
18  
19  
20  
21  
22  
23  
24  
25  
26  
27  
28  
29  
30  
31  
32  
33  
34  
35  
36  
37  
38  
39  
40  
41  
42  
43  
44  
45  
46  
47  
48  
49  
50  
51  
52  
53  
54  
55  
56  
57  
58  
59  
60

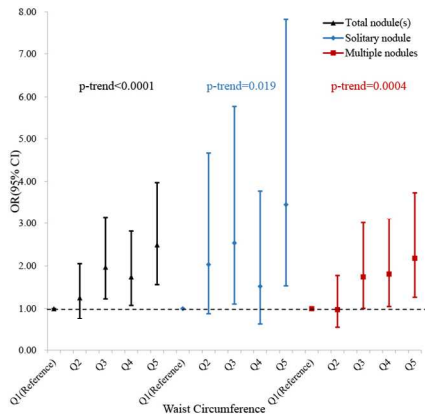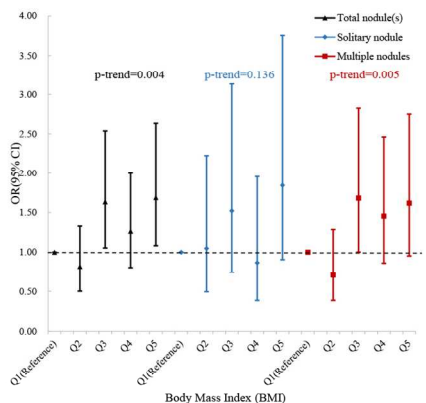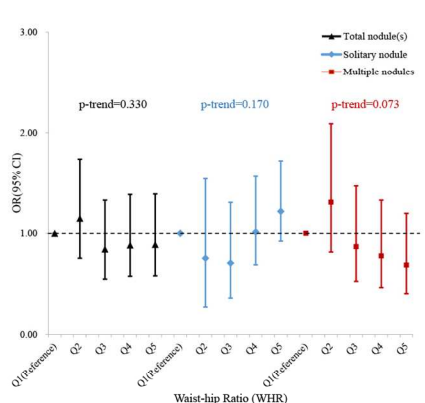

\*: Adjustment for age, sex, and iodized salt consumption status

140x140mm (300 x 300 DPI)



STROBE 2007 (v4) Statement—Checklist of items that should be included in reports of *cross-sectional studies*

| Section/Topic             | Item # | Recommendation                                                                                                                                                                       | Reported on page # |
|---------------------------|--------|--------------------------------------------------------------------------------------------------------------------------------------------------------------------------------------|--------------------|
| Title and abstract        | 1      | (a) Indicate the study’s design with a commonly used term in the title or the abstract                                                                                               | 1                  |
|                           |        | (b) Provide in the abstract an informative and balanced summary of what was done and what was found                                                                                  | 2                  |
| <b>Introduction</b>       |        |                                                                                                                                                                                      |                    |
| Background/rationale      | 2      | Explain the scientific background and rationale for the investigation being reported                                                                                                 | 4                  |
| Objectives                | 3      | State specific objectives, including any prespecified hypotheses                                                                                                                     | 4                  |
| <b>Methods</b>            |        |                                                                                                                                                                                      |                    |
| Study design              | 4      | Present key elements of study design early in the paper                                                                                                                              | 5                  |
| Setting                   | 5      | Describe the setting, locations, and relevant dates, including periods of recruitment, exposure, follow-up, and data collection                                                      | 5,6                |
| Participants              | 6      | (a) Give the eligibility criteria, and the sources and methods of selection of participants                                                                                          | 5                  |
| Variables                 | 7      | Clearly define all outcomes, exposures, predictors, potential confounders, and effect modifiers. Give diagnostic criteria, if applicable                                             | 5,6                |
| Data sources/ measurement | 8*     | For each variable of interest, give sources of data and details of methods of assessment (measurement). Describe comparability of assessment methods if there is more than one group | 6                  |
| Bias                      | 9      | Describe any efforts to address potential sources of bias                                                                                                                            | 6                  |
| Study size                | 10     | Explain how the study size was arrived at                                                                                                                                            | 5                  |
| Quantitative variables    | 11     | Explain how quantitative variables were handled in the analyses. If applicable, describe which groupings were chosen and why                                                         | 7                  |
| Statistical methods       | 12     | (a) Describe all statistical methods, including those used to control for confounding                                                                                                | 7                  |
|                           |        | (b) Describe any methods used to examine subgroups and interactions                                                                                                                  | 7                  |
|                           |        | (c) Explain how missing data were addressed                                                                                                                                          | 7                  |
|                           |        | (d) If applicable, describe analytical methods taking account of sampling strategy                                                                                                   |                    |
|                           |        | (e) Describe any sensitivity analyses                                                                                                                                                | 7                  |
| <b>Results</b>            |        |                                                                                                                                                                                      | 8                  |



|                          |     |                                                                                                                                                                                                              |    |
|--------------------------|-----|--------------------------------------------------------------------------------------------------------------------------------------------------------------------------------------------------------------|----|
| Participants             | 13* | (a) Report numbers of individuals at each stage of study—eg numbers potentially eligible, examined for eligibility, confirmed eligible, included in the study, completing follow-up, and analysed            | 5  |
|                          |     | (b) Give reasons for non-participation at each stage                                                                                                                                                         | 5  |
|                          |     | (c) Consider use of a flow diagram                                                                                                                                                                           |    |
| Descriptive data         | 14* | (a) Give characteristics of study participants (eg demographic, clinical, social) and information on exposures and potential confounders                                                                     | 10 |
|                          |     | (b) Indicate number of participants with missing data for each variable of interest                                                                                                                          | 10 |
| Outcome data             | 15* | Report numbers of outcome events or summary measures                                                                                                                                                         | 10 |
| Main results             | 16  | (a) Give unadjusted estimates and, if applicable, confounder-adjusted estimates and their precision (eg, 95% confidence interval). Make clear which confounders were adjusted for and why they were included | 12 |
|                          |     | (b) Report category boundaries when continuous variables were categorized                                                                                                                                    | 6  |
|                          |     | (c) If relevant, consider translating estimates of relative risk into absolute risk for a meaningful time period                                                                                             |    |
| Other analyses           | 17  | Report other analyses done—eg analyses of subgroups and interactions, and sensitivity analyses                                                                                                               | 14 |
| <b>Discussion</b>        |     |                                                                                                                                                                                                              |    |
| Key results              | 18  | Summarise key results with reference to study objectives                                                                                                                                                     | 14 |
| Limitations              | 19  | Discuss limitations of the study, taking into account sources of potential bias or imprecision. Discuss both direction and magnitude of any potential bias                                                   | 18 |
| Interpretation           | 20  | Give a cautious overall interpretation of results considering objectives, limitations, multiplicity of analyses, results from similar studies, and other relevant evidence                                   | 17 |
| Generalisability         | 21  | Discuss the generalisability (external validity) of the study results                                                                                                                                        | 18 |
| <b>Other information</b> |     |                                                                                                                                                                                                              |    |
| Funding                  | 22  | Give the source of funding and the role of the funders for the present study and, if applicable, for the original study on which the present article is based                                                | 19 |

\*Give information separately for cases and controls in case-control studies and, if applicable, for exposed and unexposed groups in cohort and cross-sectional studies.

**Note:** An Explanation and Elaboration article discusses each checklist item and gives methodological background and published examples of transparent reporting. The STROBE checklist is best used in conjunction with this article (freely available on the Web sites of PLoS Medicine at <http://www.plosmedicine.org/>, Annals of Internal Medicine at <http://www.annals.org/>, and Epidemiology at <http://www.epidem.com/>). Information on the STROBE Initiative is available at [www.strobe-statement.org](http://www.strobe-statement.org).
